# Supplementary material for: Evaluating the Significance of Paleophylogeographic Species Distribution Models in Reconstructing Quaternary Range-Shifts of Nearctic Chelonians
Source: PLoS One. 2013 Oct 9;8(10):e72855. doi: 10.1371/journal.pone.0072855 (PMC3794015; doi:10.1371/journal.pone.0072855)
Supplement: Material S1 — Zip file containing Appendices S1 through S7. Appendix S1: Genbank accession numbers of sequences of four mitochondrial genes (COI, control region, cytb, ND4) and three nuclear genes (R35, RAG-1, TB29) used for phylogenetic analyses; Appendix S2: Plots showing the bioclimatic conditions within each species' currently available climate space, its potential niche as well as its realized niche both in terms of species' modern and fossil occurrences; Appendix S3: Fossils of Nearctic chelonians compiled from Holman [61] and supplemented with data obtained through the Paleo Biology Database (available through www.paleodb.org). Negative MESS scores indicate conditions within the species' current realized/potential niche and positive MESS scores indicate bioclimatic conditions outside of the current realized/potential niche; Appendix S4: Videos showing the results of the Maxent and PPGM analyses, i.e. distribution changes through time in comparison to current distributions according to Maxent, non-analogous climate and information on subspecies and phylogenetic lineages; Appendix S5: Comprehensive summary of data on thermal biology of 48 Nearctic chelonian species; Appendix S6: Dated molecular phylogeny for all 59 extant species of Nearctic turtles inferred by Bayesian analyses; Appendix S7: Summary statistics of each 100 Maxent models per species. (ZIP) [file pone.0072855.s001.zip › renamed_91f67/Appendix S1 Rödder et al. - PLos ONE.xls]

## Sheet: Genbank numbers
Appendix S1. Genbank accession numbers of sequences of four mitochondrial genes (COI, control region, cytb, ND4) and three nuclear genes (R35, RAG-1, TB29) used for phylogenetic analyses.
Species	COI	Control region	Cytb	ND4	R35	RAG-1	TB29
Actinemys marmorata	HQ329640	AY904920	EU787044	AY905102	AY905217	EU787256	EU787282
Apalone ferox	-	-	AY259555	AY259605	AY259580	-	-
Apalone mutica	-	-	AY259556	AY259606	AY259581	-	-
Apalone spinifera	-	-	AY259557	AY259607	AY259582	-	-
Chelydra serpentina	DQ256378	AF029986	AF385679	DQ256378	FJ230856	FJ230857	EU907535
Chrysemys dorsalis	-	-	FJ770589	HE590369	FJ770672	FJ770717	FJ770807
Chrysemys picta	-	-	FJ770586	-	FJ770669	FJ770714	FJ770804
Clemmys guttata	HQ329641	-	FJ770590	AF258858	FJ770673	FJ770718	FJ770808
Deirochelys reticularia	-	-	FJ770592	AF258865	FJ770675	FJ770720	FJ770810
Emydoidea blandingii	HQ329642	AY904893	EU787042	AY905075	AY905211	EU787253	EU787279
Glyptemys insculpta	HQ329644	DQ499651	FJ770594	AF258864	FJ770679	FJ770724	FJ770814
Glyptemys muhlenbergii	HQ329645	DQ499652	FJ770596	AF258863	FJ770681	FJ770726	FJ770816
Graptemys barbouri	HQ329646	L28785	GQ896190	EU909370	HE590498	HE590528	-
Graptemys caglei	HQ329647	L28786	GQ896191	EU909369	FJ770683	FJ770728	FJ770818
Graptemys ernsti	HQ329648	GQ856220	L28774	GQ856231	-	-	-
Graptemys flavimaculata	HQ329649	GQ395770	GQ896192	EU909371	-	-	-
Graptemys geographica	-	L28799	FJ770598	EU909372	FJ770686	FJ770731	FJ770821
Graptemys gibbonsi	HQ329650	GQ856225	HE590301	GQ856235	HE590499	HE590529	-
Graptemys nigrinoda	HQ329651	L28792	GQ896195	DQ646420	DQ649456	HE590530	-
Graptemys oculifera	HQ329652	L28793	GQ896196	EU909374	-	-	-
Graptemys ouachitensis	-	L28794	FJ770599	DQ646421	FJ770687	FJ770732	FJ770822
Graptemys pearlensis	-	GQ856224	GQ896194	GQ856234	-	-	-
Graptemys pseudogeographica	-	L28790	FJ770600	EU909376	FJ770688	FJ770733	FJ770823
Graptemys pulchra	-	L28795	GQ896199	EU909377	-	-	-
Graptemys versa	HQ329653	L28797	GQ896200	DQ646422	-	-	-
Kinosternon alamosae	HQ329708	-	-	-	-	-	-
Kinosternon arizonense	HQ329710	AF316121	-	-	-	-	-
Kinosternon baurii	-	AF316123	-	-	AY339642	-	-
Kinosternon durangoense	HQ329714	AF316124	-	-	-	-	-
Kinosternon flavescens	DQ256379	AF316126	-	-	GU085686	GU085674	GU085717
Kinosternon herrerai	-	-	-	-	-	-	-
Kinosternon hirtipes	HQ329716	AF316136	-	-	-	-	-
Kinosternon integrum	HQ329715	-	-	-	-	-	-
Kinosternon sonoriense	-	-	-	-	-	-	-
Kinosternon subrubrum	-	AF316137	-	-	-	-	-
Macrochelys temminckii	EF071948	-	AF385680	EF071948	FJ230863	FJ230864	GU085720
Malaclemys terrapin	HQ329654	L28791	FJ770602	DQ646423	FJ770690	FJ770735	FJ770825
Pseudemys alabamensis	HQ329655	GQ395750	GQ395714	-	-	-	-
Pseudemys concinna	-	GQ395754	FJ770603	DQ646424	FJ770691	FJ770736	FJ770826
Pseudemys floridana	-	GQ395761	FJ770604	HE590378	FJ770692	FJ770737	FJ770827
Pseudemys gorzugi	HQ329656	GQ395735	GQ395699	-	GQ896246	-	-
Pseudemys nelsoni	-	GQ395737	EU909384	EU909379	FJ770694	FJ770739	FJ770829
Pseudemys peninsularis	-	GQ395739	FJ770606	EU909378	FJ770695	FJ770740	FJ770830
Pseudemys rubriventris	HQ329657	GQ395744	EU909385	EU909380	GQ896248	-	-
Pseudemys texana	-	GQ395748	EU909386	GQ895901	-	-	-
Rhinoclemmys pulcherrima	-	-	EU930785	-	-	EU930808	-
Sternotherus carinatus	-	-	-	-	-	-	EU907534
Sternotherus depressus	HQ329724	-	-	-	-	-	-
Sternotherus minor	-	U19540	-	-	-	-	-
Sternotherus odoratus	-	AF316138	GQ896189	HQ709263	GU085691	AY687911	GU085723
Terrapene carolina	HQ329658	HQ638982	FJ770608	GQ895902	FJ770696	FJ770741	FJ770832
Terrapene coahuila	HQ329659	HQ639017	FJ770611	AF258860	FJ770699	FJ770744	FJ770835
Terrapene nelsoni	-	-	AF258873	AF258861	HQ266664	HQ266660	HQ266661
Terrapene ornata	HQ329660	-	FJ770613	AF258862	FJ770704	FJ770749	FJ770840
Trachemys gaigeae	HQ329663	-	GQ896204	DQ338480	HE590515	HE590545	-
Trachemys nebulosa	-	-	EU909388	EU909381	GQ896250	-	-
Trachemys ornata	HQ329665	-	HE590354	HE590425	HE590517	HE590547	-
Trachemys scripta	-	-	FJ770618	DQ338478	FJ770706	FJ770751	FJ770842
Trachemys taylori	HQ329667	-	FJ770622	DQ338493	FJ770710	FJ770755	FJ770846
Trachemys venusta	HQ329664	-	EU909387	EU909382	GQ896251	HE590551	-
Trachemys yaquia	HQ329670	-	-	DQ338512	-	-	-
