# Supplementary material for: Evaluating the Significance of Paleophylogeographic Species Distribution Models in Reconstructing Quaternary Range-Shifts of Nearctic Chelonians
Source: PLoS One. 2013 Oct 9;8(10):e72855. doi: 10.1371/journal.pone.0072855 (PMC3794015; doi:10.1371/journal.pone.0072855)
Supplement: Material S1 — Zip file containing Appendices S1 through S7. Appendix S1: Genbank accession numbers of sequences of four mitochondrial genes (COI, control region, cytb, ND4) and three nuclear genes (R35, RAG-1, TB29) used for phylogenetic analyses; Appendix S2: Plots showing the bioclimatic conditions within each species' currently available climate space, its potential niche as well as its realized niche both in terms of species' modern and fossil occurrences; Appendix S3: Fossils of Nearctic chelonians compiled from Holman [61] and supplemented with data obtained through the Paleo Biology Database (available through www.paleodb.org). Negative MESS scores indicate conditions within the species' current realized/potential niche and positive MESS scores indicate bioclimatic conditions outside of the current realized/potential niche; Appendix S4: Videos showing the results of the Maxent and PPGM analyses, i.e. distribution changes through time in comparison to current distributions according to Maxent, non-analogous climate and information on subspecies and phylogenetic lineages; Appendix S5: Comprehensive summary of data on thermal biology of 48 Nearctic chelonian species; Appendix S6: Dated molecular phylogeny for all 59 extant species of Nearctic turtles inferred by Bayesian analyses; Appendix S7: Summary statistics of each 100 Maxent models per species. (ZIP) [file pone.0072855.s001.zip › renamed_91f67/Appendix S3 Rödder et al. - PLos ONE.xls]

## Sheet: fossils_min_MESS_pd
Appendix S3. Fossils of Nearctic Chelonians compiled from Holman (1995) and supplemented with data obtained through the Palaeo Biology Database (available through www.paleodb.org). Negative MESS scores indicate conditions within the species’ current realized / potential niche and positive MESS scores (shaded in red) indicate bioclimatic conditions outside of the current realized / potential niche.
Species	ID	lon	lat	Site	County	State	Time slice	time [ky BP]		realized niche			potential niche
										MESS	Variable		MESS	Variable
Actinemys marmorata	sp1	-119.623	35.3056	McKittrick Asphalt	Kern	California	3	9.4		-5.61	BIO12		-2.78	BIO18
Actinemys marmorata	sp1	-119.523	34.3984	Carpenteria	Santa Barbara	California	6	24.7		-4.75	BIO13		-0.97	BIO4
Actinemys marmorata	sp1	-118.356	34.0628	Rancho La Brea	Los Angeles	California	3	9.4		-0.57	BIO6		-0.95	BIO4
Actinemys marmorata	sp1	-117.617	33.6168	Costeau Pit	Orange	California	8	37.5		-26.44	BIO18		-22.62	BIO3
Apalone ferox	sp2	-82.4468	29.3875	Williston 3A	Levy	Florida	20	90.4		104.1	BIO10		-14.13	BIO2
Apalone ferox	sp2	-82.1973	29.3666	Reddick 1	Marion	Florida	20	90.4		90.97	BIO10		-16.3	BIO12
Apalone spinifera	sp4	-98.1573	38.7111	Kanapolis	Ellsworth	Kansas	20	90.4		78.62	BIO10		2.39	BIO9
Apalone spinifera	sp4	-97.2066	27.8666	Ingleside	San Patricio	Texas	6	24.7		25.27	BIO13		-0.21	BIO2
Apalone spinifera	sp4	-96.3618	30.6178	Pitt Bridge	Brazos/Burleson	Texas	20	90.4		7.45	BIO12		-0.19	BIO17
Apalone spinifera	sp4	-89.4016	39.8195	Clear Creek	Sangamon	Illinois	6	24.7		151.95	BIO10		22.04	BIO9
Apalone spinifera	sp4	-87.7922	34.7294	Bell Cave	Colbert	Alabama	4	14.1		7.54	BIO8		-4.53	BIO8
Apalone spinifera	sp4	-87.1703	38.7163	Prairie Creek D	Daviess	Indiana	4	14.1		-0.2	BIO10		-38.51	BIO5
Chelydra serpentina	sp5	-114.569	36.6653	Glendale	Clark	Nevada	3	9.4		24.04	BIO5		1.55	BIO18
Chelydra serpentina	sp5	-101.893	33.62	Lubbock Lake (Plainview period)	Lubbock	Texas	3	9.4		-0.04	BIO2		-26.02	BIO2
Chelydra serpentina	sp5	-101.893	33.62	Lubbock Lake (Clovis period)	Lubbock	Texas	3	9.4		-0.04	BIO2		-26.02	BIO2
Chelydra serpentina	sp5	-100.552	37.0466	XI Ranch Localities	Meade	Kansas	20	90.4		14.98	BIO10		-6.41	BIO10
Chelydra serpentina	sp5	-100.498	37.1334	Jinglebob	Meade	Kansas	6	24.7		41.56	BIO10		-1.1	BIO1
Chelydra serpentina	sp5	-100.348	36.9847	Nye Sink	Beaver	Oklahoma	20	90.4		15.8	BIO10		-6.03	BIO10
Chelydra serpentina	sp5	-99.5205	34.3535	Howard Ranch (=Groesbeck Creek)	Hardeman	Texas	5	19.3		-3.08	BIO2		-9.32	BIO13
Chelydra serpentina	sp5	-98.5677	38.9072	Razabeck	Lincoln	Kansas	42	160.6		75.18	BIO10		7.27	BIO9
Chelydra serpentina	sp5	-98.1573	38.7111	Kanapolis	Ellsworth	Kansas	20	90.4		56.49	BIO10		2.39	BIO9
Chelydra serpentina	sp5	-97.9814	40.282	Angus	Nuckolls	Nebraska	42	160.6		113.7	BIO10		19.81	BIO9
Chelydra serpentina	sp5	-92.281	38.8516	Brynjulfson Cave 1	Boone	Missouri	3	9.4		-26.16	BIO19		-52.52	BIO13
Chelydra serpentina	sp5	-87.1703	38.7163	Prairie Creek D	Daviess	Indiana	4	14.1		-22.65	BIO9		-47.34	BIO13
Chelydra serpentina	sp5	-85.8248	39.8673	Christensen Bog	Hancock	Indiana	4	14.1		-0.37	BIO10		-24.62	BIO5
Chelydra serpentina	sp5	-83.3674	40.8668	Sheridan Pit	Wyandot	Ohio	3	9.4		-24.57	BIO12		-32.12	BIO2
Chelydra serpentina	sp5	-82.3662	29.3668	Devil's Den Chamber 3	Levy	Florida	3	9.4		-5.26	BIO18		-3.76	BIO18
Chelydra serpentina	sp5	-81.7692	36.9575	Saltville Valley	Smyth	Virginia	3	9.4		-17.59	BIO15		-9.56	BIO15
Chelydra serpentina	sp5	-81.7692	36.9575	Saltville Valley	Smyth	Virginia	4	14.1		-2.28	BIO10		-10.48	BIO15
Chelydra serpentina	sp5	-81.7692	36.9575	-	Smyth	Virginia	4	14.1		-2.28	BIO10		-10.48	BIO15
Chelydra serpentina	sp5	-80.3975	27.6383	Vero Beach Strata 2 and 3	Indian River	Florida	3	9.4		-2.04	BIO4		-5.86	BIO18
Chelydra serpentina	sp5	-80.3975	27.6383	Vero Beach Strata 2 and 3	Indian River	Florida	4	14.1		-2.04	BIO4		-6.38	BIO4
Chelydra serpentina	sp5	-80.2925	32.5592	Edisto Beach	Colleton	South Carolina	3	9.4		-8.99	BIO13		-7.37	BIO18
Chelydra serpentina	sp5	-79.0831	38.3578	Natural Chimneys	Augusta	Virginia	6	24.7		96.97	BIO10		0.84	BIO9
Chrysemys picta	sp7	-100.552	37.0466	XI Ranch Localities	Meade	Kansas	20	90.4		28.93	BIO2		-4.48	BIO2
Chrysemys picta	sp7	-100.498	37.1334	Jinglebob	Meade	Kansas	6	24.7		33.02	BIO10		-2.7	BIO2
Chrysemys picta	sp7	-100.285	37.0901	Jones	Meade	Kansas	6	24.7		33.02	BIO10		-2.7	BIO2
Chrysemys picta	sp7	-98.5677	38.9072	Razabeck	Lincoln	Kansas	42	160.6		70	BIO10		-0.75	BIO1
Chrysemys picta	sp7	-97.9814	40.282	Angus	Nuckolls	Nebraska	42	160.6		112.37	BIO10		5.21	BIO9
Chrysemys picta	sp7	-87.7922	34.7294	Bell Cave	Colbert	Alabama	6	24.7		36.83	BIO10		-1.24	BIO14
Chrysemys picta	sp7	-87.1703	38.7163	Prairie Creek D	Daviess	Indiana	4	14.1		-19.83	BIO13		-35.12	BIO17
Chrysemys picta	sp7	-85.8248	39.8673	Christensen Bog	Hancock	Indiana	4	14.1		-2.59	BIO10		-44.86	BIO15
Chrysemys picta	sp7	-84.9441	34.237	Kingston Saltpeter Cave	Bartow	Georgia	3	9.4		-3.85	BIO13		-9.25	BIO9
Chrysemys picta	sp7	-84.8333	34.15	Ladds Quarry	Bartow	Georgia	3	9.4		-1.8	BIO4		-8.5	BIO9
Chrysemys picta	sp7	-83.3674	40.8668	Sheridan Pit	Wyandot	Ohio	3	9.4		-50.26	BIO2		-49.83	BIO2
Chrysemys picta ?	sp7	-82.2166	36.4503	Guy Wilson Cave	Sullivan	Tennessee	5	19.3		4.19	BIO10		-4.91	BIO14
Chrysemys picta ?	sp7	-81.7692	36.9575	Saltville Valley	Smyth	Virginia	4	14.1		-1.09	BIO2		-8.37	BIO15
Chrysemys picta ?	sp7	-81.7692	36.9575	Saltville Valley	Smyth	Virginia	6	24.7		63.49	BIO10		-2.27	BIO14
Clemmys guttata	sp8	-80.4298	33.2746	Ardis	Dorchester	South Carolina	6	24.7		-2.96	BIO12		-15.31	BIO18
Deirochelys reticularia	sp9	-82.5748	27.4989	Bradenton	Manatee	Florida	20	90.4		16.15	BIO10		-15.1	BIO5
Deirochelys reticularia	sp9	-82.3662	29.3668	Devil's Den Chamber 3	Levy	Florida	3	9.4		-30.59	BIO18		-11.56	BIO18
Deirochelys reticularia	sp9	-82.184	29.3672	Reddick 2	Marion	Florida	20	90.4		33.93	BIO10		-12.36	BIO5
Deirochelys reticularia	sp9	-80.3975	27.6383	Vero Beach Strata 2 and 3	Indian River	Florida	6	24.7		10.8	BIO10		-18.53	BIO5
Emydoidea blandingii	sp10	-100.552	37.0466	XI Ranch Localities	Meade	Kansas	20	90.4		61.58	BIO2		-0.71	BIO18
Emydoidea blandingii	sp10	-100.498	37.1334	Jinglebob	Meade	Kansas	6	24.7		80.1	BIO10		-0.15	BIO18
Emydoidea blandingii	sp10	-100.348	36.9847	Nye Sink	Beaver	Oklahoma	20	90.4		59.06	BIO2		-0.42	BIO18
Emydoidea blandingii	sp10	-92.281	38.8516	Brynjulfson Cave 1	Boone	Missouri	3	9.4		-0.15	BIO5		-14.23	BIO10
Emydoidea blandingii	sp10	-87.1703	38.7163	Prairie Creek D	Daviess	Indiana	4	14.1		-1.98	BIO16		-15.8	BIO13
Emydoidea blandingii	sp10	-83.3674	40.8668	Sheridan Pit	Wyandot	Ohio	3	9.4		-20.7	BIO4		-39.12	BIO2
Emydoidea blandingii	sp10	-79.3871	38.6963	New Trout Cave	Pendleton	West Virginia	7	30.3		217.97	BIO10		12.1	BIO10
Kinosternon subrubrum	sp35	-84.8333	34.15	Ladds Quarry	Bartow	Georgia	3	9.4		-2.5	BIO8		-8.07	BIO8
Kinosternon subrubrum	sp35	-82.3662	29.3668	Devil's Den Chamber 3	Levy	Florida	3	9.4		-10.41	BIO18		-6.52	BIO18
Kinosternon subrubrum	sp35	-80.3975	27.6383	Vero Beach Strata 2 and 3	Indian River	Florida	6	24.7		7.94	BIO17		-14.39	BIO7
Malaclemys terrapin	sp37	-80.2925	32.5592	Edisto Beach	Colleton	South Carolina	3	9.4		-55.28	BIO13		-29.73	BIO2
Pseudemys cf. concinna	sp39	-98.1573	38.7111	Kanapolis	Ellsworth	Kansas	20	90.4		141.12	BIO10		5.44	BIO11
Pseudemys cf. concinna	sp39	-84.8333	34.15	-	-	Georgia	96	300.2		1.37	BIO8		-1.97	BIO8
Pseudemys cf. floridana	sp39	-80.3975	27.6383	Vero Beach Strata 2 and 3	Indian River	Florida	3	9.4		14.28	BIO4		-7.79	BIO8
Pseudemys concinna	sp39	-87.7922	34.7294	Bell Cave	Colbert	Alabama	4	14.1		0.68	BIO8		-2.07	BIO8
Pseudemys concinna	sp39	-84.8333	34.15	Ladds Quarry	Bartow	Georgia	3	9.4		-2.71	BIO5		-5.42	BIO8
Pseudemys floridana	sp40	-82.4468	29.3875	Williston 3A	Levy	Florida	19	87.4		16.39	BIO19		-21.21	BIO12
Pseudemys floridana	sp40	-82.2332	27.0749	Little Salt Spring	Sarasota	Florida	4	14.1		58.68	BIO4		-19.76	BIO18
Pseudemys floridana	sp40	-80.2925	32.5592	Edisto Beach	Colleton	South Carolina	4	14.1		-0.06	BIO5		-12.07	BIO3
Pseudemys nelsoni	sp42	-84.8333	34.15	Ladds Quarry	Bartow	Georgia	3	9.4		814.3	BIO8		-1.84	BIO8
Pseudemys nelsoni	sp42	-82.2332	27.0749	Little Salt Spring	Sarasota	Florida	4	14.1		-4.14	BIO8		-24.02	BIO18
Pseudemys nelsoni	sp42	-80.2925	32.5592	Edisto Beach	Colleton	South Carolina	4	14.1		44.29	BIO10		-14.55	BIO3
Sternotherus minor	sp49	-80.3975	27.6383	Vero Beach Strata 2 and 3	Indian River	Florida	6	24.7		-1.6	BIO12		-1.33	BIO12
Sternotherus odoratus	sp50	-98.1573	38.7111	Kanapolis	Ellsworth	Kansas	20	90.4		73.05	BIO10		2.39	BIO9
Sternotherus odoratus	sp50	-96.9999	33.2503	Clear Creek	Denton	Texas	7	30.3		53.44	BIO5		-0.71	BIO5
Sternotherus odoratus	sp50	-87.1703	38.7163	Prairie Creek D	Daviess	Indiana	4	14.1		-2.47	BIO10		-41.23	BIO5
Sternotherus odoratus	sp50	-80.3975	27.6383	Vero Beach Strata 2 and 3	Indian River	Florida	6	24.7		-0.1	BIO14		-7.33	BIO4
Terrapene carolina	sp51	-103.325	34.2774	Brown Sand Wedge	-	New Mexico	4	14.1		12.58	BIO2		-21.98	BIO2
Terrapene carolina	sp51	-101.893	33.62	Lubbock Lake (Clovis period)	Lubbock	Texas	3	9.4		6.17	BIO2		-30.08	BIO13
Terrapene carolina	sp51	-101.621	33.416	Slaton	Lubbock	Texas	31	122.5		2.95	BIO2		-37.41	BIO2
Terrapene carolina	sp51	-100.498	37.1334	Jinglebob	Meade	Kansas	6	24.7		53.09	BIO10		-0.69	BIO6
Terrapene carolina	sp51	-100.392	37.2623	Cragin Quarry	Meade	Kansas	20	90.4		38.06	BIO10		-1.74	BIO1
Terrapene carolina	sp51	-100.3	37.2	-	Meade	Kansas	96	300.2		13.19	BIO2		-21.2	BIO2
Terrapene carolina	sp51	-99.4654	34.3375	Howard Ranch (=Groesbeck Creek)	Hardeman	Texas	5	19.3		1.6	BIO6		-31.13	BIO13
Terrapene carolina	sp51	-98.4121	29.7095	Friesenhahn Cave	Bexar	Texas	3	9.4		-6.95	BIO12		-21.42	BIO10
Terrapene carolina	sp51	-98.25	34.8667	Domebo	Caddo	Oklahoma	3	9.4		-1.36	BIO12		-24.6	BIO5
Terrapene carolina	sp51	-97.2066	27.8666	Ingleside	San Patricio	Texas	6	24.7		2.1	BIO5		-0.55	BIO2
Terrapene carolina	sp51	-96.9999	33.2503	Clear Creek	Denton	Texas	7	30.3		42.5	BIO10		-0.73	BIO5
Terrapene carolina	sp51	-96.9667	33.0667	Lewisville	Denton	Texas	6	24.7		40.72	BIO10		-0.61	BIO5
Terrapene carolina	sp51	-96.7075	32.7147	Moore Pit	Dallas	Texas	6	24.7		48.97	BIO10		-0.48	BIO5
Terrapene carolina	sp51	-96.3618	30.6178	Pitt Bridge	Brazos/Burleson	Texas	20	90.4		-0.09	BIO10		-0.6	BIO17
Terrapene carolina	sp51	-95.2666	29.6826	Sims Bayou	Harris	Texas	6	24.7		18.43	BIO10		-0.36	BIO14
Terrapene carolina	sp51	-93.4925	38.0356	Jones Spring	Hickory	Missouri	8	37.5		106.26	BIO10		9.46	BIO11
Terrapene carolina	sp51	-84.9441	34.237	Kingston Saltpeter Cave	Bartow	Georgia	3	9.4		-5.14	BIO8		-5.73	BIO8
Terrapene carolina	sp51	-84.8333	34.15	Ladds Quarry	Bartow	Georgia	3	9.4		-6.58	BIO8		-6.44	BIO8
Terrapene carolina	sp51	-84.8333	34.15	-	-	Georgia	96	300.2		-1.51	BIO8		-3.98	BIO8
Terrapene carolina	sp51	-82.7682	29.9615	Ichetucknee River	Columbia	Florida	5	19.3		-7.7	BIO2		-12.74	BIO18
Terrapene carolina	sp51	-82.5748	27.4989	Bradenton	Manatee	Florida	15	73.9		-2.95	BIO14		-18.03	BIO18
Terrapene carolina	sp51	-82.5748	27.4989	Bradenton	Manatee	Florida	20	90.4		-2.95	BIO14		-19.04	BIO18
Terrapene carolina	sp51	-82.5667	29.7	Haile 14A	Alachua	Florida	20	90.4		-7.25	BIO2		-13.49	BIO18
Terrapene carolina	sp51	-82.5667	29.7	Haile	Alachua	Florida	20	90.4		-7.25	BIO2		-13.49	BIO18
Terrapene carolina	sp51	-82.4468	29.3875	Williston 3A	Levy	Florida	20	90.4		-7.92	BIO3		-11.99	BIO18
Terrapene carolina	sp51	-82.4008	29.6164	Arredondo	Alachua	Florida	20	90.4		-8.95	BIO3		-19.41	BIO18
Terrapene carolina	sp51	-82.3662	29.3668	Devil's Den Chamber 3	Levy	Florida	3	9.4		-6.69	BIO18		-8.81	BIO18
Terrapene carolina	sp51	-82.2332	27.0749	Little Salt Spring	Sarasota	Florida	4	14.1		-4.38	BIO18		-7.36	BIO18
Terrapene carolina	sp51	-82.1976	29.3666	Reddick 1	Marion	Florida	20	90.4		-8.95	BIO3		-19.41	BIO18
Terrapene carolina	sp51	-82.184	29.3672	Reddick 2	Marion	Florida	20	90.4		-8.95	BIO3		-19.41	BIO18
Terrapene carolina	sp51	-82.1012	29.4315	Orange Lake	Marion	Florida	20	90.4		-8.95	BIO3		-19.41	BIO18
Terrapene carolina	sp51	-82.0835	29.0332	Eichelberger Cave	Marion	Florida	3	9.4		-1.63	BIO18		-5.36	BIO18
Terrapene carolina	sp51	-81.8652	29.1093	Mefford Cave	Marion	Florida	5	19.3		-8.09	BIO3		-19.91	BIO18
Terrapene carolina	sp51	-80.3975	27.6383	Vero Beach Strata 2 and 3	Indian River	Florida	6	24.7		-1.3	BIO12		-28.95	BIO7
Terrapene carolina	sp51	-80.2925	32.5592	Edisto Beach	Colleton	South Carolina	3	9.4		-12.94	BIO13		-14.22	BIO18
Terrapene carolina	sp51	-79.527	38.7043	Strait Canyon Fissure	Highland	Virginia	7	30.3		131.23	BIO10		7.9	BIO11
Terrapene carolina	sp51	-79.0831	38.3578	Natural Chimneys	Augusta	Virginia	6	24.7		105.92	BIO10		0.97	BIO11
Terrapene carolina	sp51	-76.7251	40.0167	Bootlegger Sink	York	Pennsylvania	6	24.7		119.94	BIO10		10.53	BIO11
Terrapene carolina ?	sp51	-82.2166	36.4503	Guy Wilson Cave	Sullivan	Tennessee	5	19.3		28.11	BIO10		-2.71	BIO5
Terrapene cf. ornata	sp51	-92.281	38.8516	Brynjulfson Cave 1	Boone	Missouri	3	9.4		-3.71	BIO7		-39.29	BIO3
Terrapene cf. ornata	sp51	-90.5004	38.3671	Crankshaft Cave	Jefferson	Missouri	6	24.7		125.72	BIO10		14.49	BIO11
Terrapene ornata	sp54	-103.325	34.2774	Brown Sand Wedge	-	New Mexico	4	14.1		-15.85	BIO5		-48.21	BIO2
Terrapene ornata	sp54	-101.893	33.62	Lubbock Lake (Plainview period)	Lubbock	Texas	3	9.4		-37	BIO13		-39.43	BIO8
Terrapene ornata	sp54	-100.552	37.0466	XI Ranch Localities	Meade	Kansas	20	90.4		56.4	BIO10		-6.08	BIO18
Terrapene ornata	sp54	-99.8667	30.25	Schulze Cave	Edwards	Texas	4	14.1		-14.94	BIO7		-29.69	BIO4
Terrapene ornata	sp54	-96.9999	33.2503	Clear Creek	Denton	Texas	7	30.3		76.34	BIO10		-0.05	BIO12
Trachemys scripta	sp58	-101.893	33.62	Lubbock Lake (Plainview period)	Lubbock	Texas	3	9.4		-0.02	BIO13		-34	BIO2
Trachemys scripta	sp58	-101.893	33.62	Lubbock Lake (Folsom period)	Lubbock	Texas	3	9.4		-0.02	BIO13		-34	BIO2
Trachemys scripta	sp58	-101.893	33.62	Lubbock Lake (Clovis period)	Lubbock	Texas	3	9.4		-0.02	BIO13		-34	BIO2
Trachemys scripta	sp58	-100.552	37.0466	XI Ranch Localities	Meade	Kansas	20	90.4		87.35	BIO10		-4.17	BIO1
Trachemys scripta	sp58	-100.497	37.0467	Adams	Meade	Kansas	42	160.6		113.57	BIO10		-1.61	BIO6
Trachemys scripta	sp58	-98.1573	38.7111	Kanapolis	Ellsworth	Kansas	20	90.4		141.53	BIO10		2.65	BIO11
Trachemys scripta	sp58	-97.9814	40.282	Angus	Nuckolls	Nebraska	42	160.6		216.18	BIO10		21.11	BIO11
Trachemys scripta	sp58	-97.2066	27.8666	Ingleside	San Patricio	Texas	6	24.7		63.54	BIO5		-0.25	BIO2
Trachemys scripta	sp58	-96.9999	33.2503	Clear Creek	Denton	Texas	7	30.3		107.53	BIO10		-0.83	BIO5
Trachemys scripta	sp58	-95.2666	29.6826	Sims Bayou	Harris	Texas	6	24.7		85.42	BIO5		-0.1	BIO17
Trachemys scripta	sp58	-93.5225	38.0671	Jones Spring	Hickory	Missouri	8	37.5		194.82	BIO10		9.91	BIO11
Trachemys scripta	sp58	-85.3614	36.3254	Robinson Cave	Overton	Tennessee	6	24.7		149.15	BIO10		-0.35	BIO5
Trachemys scripta	sp58	-82.4661	36.4583	Baker Bluff Cave	Sullivan	Tennessee	3	9.4		10.57	BIO10		-4.48	BIO15
Trachemys scripta	sp58	-82.3662	29.3668	Devil's Den Chamber 3	Levy	Florida	3	9.4		-0.75	BIO3		-6.25	BIO18
Trachemys scripta	sp58	-80.3975	27.6383	Vero Beach Strata 2 and 3	Indian River	Florida	3	9.4		8.62	BIO4		-9.27	BIO18
