# Supplementary material for: Evaluating the Significance of Paleophylogeographic Species Distribution Models in Reconstructing Quaternary Range-Shifts of Nearctic Chelonians
Source: PLoS One. 2013 Oct 9;8(10):e72855. doi: 10.1371/journal.pone.0072855 (PMC3794015; doi:10.1371/journal.pone.0072855)
Supplement: Material S1 — Zip file containing Appendices S1 through S7. Appendix S1: Genbank accession numbers of sequences of four mitochondrial genes (COI, control region, cytb, ND4) and three nuclear genes (R35, RAG-1, TB29) used for phylogenetic analyses; Appendix S2: Plots showing the bioclimatic conditions within each species' currently available climate space, its potential niche as well as its realized niche both in terms of species' modern and fossil occurrences; Appendix S3: Fossils of Nearctic chelonians compiled from Holman [61] and supplemented with data obtained through the Paleo Biology Database (available through www.paleodb.org). Negative MESS scores indicate conditions within the species' current realized/potential niche and positive MESS scores indicate bioclimatic conditions outside of the current realized/potential niche; Appendix S4: Videos showing the results of the Maxent and PPGM analyses, i.e. distribution changes through time in comparison to current distributions according to Maxent, non-analogous climate and information on subspecies and phylogenetic lineages; Appendix S5: Comprehensive summary of data on thermal biology of 48 Nearctic chelonian species; Appendix S6: Dated molecular phylogeny for all 59 extant species of Nearctic turtles inferred by Bayesian analyses; Appendix S7: Summary statistics of each 100 Maxent models per species. (ZIP) [file pone.0072855.s001.zip › renamed_91f67/Appendix S5 Rödder et al. - PLos ONE.xls]

## Sheet: Thermal biology
Appendix S5. Review of thermobiological data available for 59 Nearctic Chelonians.
Species	Comment	Mean T LRA [°C]	Reference (Mean T LRA [°C])	Mean CT max [°C]	Reference (Mean CT max [°C])	Mean CT min [C°]	Reference (Mean CT min [C°])	Mean preferred BT [°C]	Reference (Mean preferred BT [°C])	Mating season	Reference (Mating season)	Nesting	Reference (Nesting)	TSD/GSD	Reference (TSD/GSD)	PIT [C°]	Reference (PIT [C°])	No. of clutches	Reference (No. of clutches)	Hatching season	Reference (Hatching season)	Activity min [C°]	Reference (Activity min [C°])	Activity max [C°]	Referene (Activity max [C°])	Feeding min [C°]	Reference (Feeding min [C°])	IT min [C°]	Reference (IT min [C°])	IT max [C°]	Reference (IT max [C°])	Fossil records
Chelydra serpentina								22.7	Brown et al. 1990	throughout year	Aresco et al. 2006							2-4	Aresco et al. 2006													x
Chelydra serpentina				39.5	Hutchinson et al. 1966	-0.7	Bichard & Packard 1997	28.1	Schuett & Gatten 1980	Mar - Nov	Ernst & Lovich 2009	May - Jun	Ernst & Lovich 2009	TSD 2	Janzen 1992	24.8	Bobyn & Brooks 1994	1	Ernst & Lovich 2009	Aug - Okt	Ernst & Lovich 2009	5	Obbard & Brooks 1981			15	Obbard & Brooks 1981	22	Yntema 1978	30	Yntema 1978	x
Macrochelys temminckii				39.35	Hutchinson et al. 1966					Feb - Apr	Grimpe 1987, Nickerson In Pritchard 1989	Apr - Jun	Ewert 1976, Powders 1978, Ewert & Jackson 1994, Jackson & Jensen 2003, Ewert et al. 2006b	TSD 2	Ewert & Nelson 1991	27.5	Ligon & Lovern 2009	1	Allen & Neill 1950, Ewert & Jackson 1994	Aug - Sep	Holcomb & Carr 2011					18	Allen & Neil 1950
Actinemys (Clemmys) marmorata	hatchlings may overwinter in the nest, emerge in Feb, March			40	Bury 1972					Apr - Sep	Holland 1988, Buskirk 1991, Goodman 1997	Apr - Aug	Holland 1994	TSD 1a	Ewert et al. 1994	30	Ewert et al. 1994	1-2	Goodman 1997	late summer to fall	Holland 1994, Reese & Welsh 1997	occationally active at 3	Holland 1994									x
Chrysemys picta	hatchlings may overwinter in the nest emerge in april, may. Hatchlings are very tolerant to freezing (-11°C); 2 treshhold It			R.I 40.9; Minn. 40.9; Tenn. 41.2; N.S. 41.57; Wisc. 41.6; La. 41.66; Mich. 42.2	Hutchinson et al. 1966	-2	Ernst & Lovich 2009	17 to 23	Ernst 1972	Mar - Jun/ Aug - Oct	Ernst 1971b, Gist et al. 1990	Apr - Jul	Dundee & Rossman 1989, Trauth et al. 2004	TSD 1a / 2	Bull & Vogt 1979	20.0/27.5	Gutzke & Paukstis 1984, Ewert et al. 1994	1-4	Tinkle et al. 1981, Congdon & Tinkle 1982, Iverson & Smith 1993, Rhodin & Mittelhauser 1994	Aug	Ernst 1971a					15	Ernst 1972	21.5*	Gutzke & Paukstis 1984, Schwarzkopf & Brooks 1985, Ewert & Nelson 1991, Ewert et al. 2004	32.0*	Gutzke & Paukstis 1984, Schwarzkopf & Brooks 1985, Ewert & Nelson 1991, Ewert et al. 2004	x
Clemmys guttata	hatchlings sometimes overwinter within the nest			41.98	Hutchinson et al. 1966	0.3	Ernst & Lovich 2009			Mar - Jun	Litzgus 2004	Jun	Litzgus 2004	TSD 1a	Ewert et al. 2004			1-3	Wilson 1989, Ernst & Zug 1994, Litzgus & Mousseau 2003	Aug - Nov	Ernst et al. 1994, Ernst et al. 1997a	3	Ernst & Lovich 2009	32	Ernst & Lovich 2009	14	Ernst & Lovich 2009	22.5*	Ernst & Lovich 2009	30*	Ernst & Lovich 2009	x
Deirochelys reticularia	diapause 15-22°C / "winter" nesting pattern	39.1	Hutchinson et al. 1966	41.3	Hutchinson et al. 1966					May - Jul	Gibbons 1969	Feb - May & Aug - Nov	Gibbons 1969 Gibbons & Greene 1978, 1979, 1990	TSD 1a	Ewert & Nelson 1991			2	Jackson 1988									27-31/15-22 diap. / 24-31 rest	Ewert et al. 2006a			x
Emydoidea blandingii				39.55	Hutchinson et al. 1966	-3.5	Ernst & Lovich 2009	♀ 24.8, ♂ 22.5	Nutting & Graham 1993	Mar-Nov	Conant 1951, Graham & Doyle 1979, Vogt 1981	May - Jul	Bleakney 1963, Congdon et al. 1983, Rowe & Moll 1991, Rowe 1992, Standing et al. 1999, Joyal et al. 2000,	TSD 1a	Gutzke & Packard 1987, Ewert & Nelson 1991			1-2	Pappas et al. 2000, Standing et al. 2000, Refsnider & Schlick 2006	Aug - Oct	Joyal et al. 2000, Ernst & Lovich 2009	10	Rowe & Moll 1991			19	Ernst & Lovich 2009	no development at 22.0	Ernst & Lovich 2009	31*	Ernst & Lovich 2009	x
Glyptemys (Clemmys) insculpta	hatchlings sometimes spend the winter within the nest	39.8	Hutchinson et al. 1966	41.3	Hutchinson et al. 1966					May - Dec	Arvisais et al. 2001, Walde et al. 2003, Ernst & Lovich 2009	May - Jul	Powell 1967, Gräf et al. 2003, Ewert & Lovich 2009	GSD	Ewert & Nelson 1991, Ewert et al. 2004			1-2	Akre 2002	Aug - Oct	Ernst & Lovich 2009	AT: 3, WT: 6	Ernst & Lovich 2009			15	Ernst 1986a
Glyptemys muhlenbergii	hatchlings may overwinter in the nest									Mar - Jun	Ernst et al. 1997a	May - Jul	Ernst et al. 1997a	unknown				1	Ernst et al. 1997a	Aug - Sep	Ernst et al. 1997a	16	Ernst & Lovich 2009	31	Ernst & Lovich 2009
Graptemys barbouri												Apr - Aug	Walhquist & Folkerts 1973, Sanderson 1974, Jackson 2003, Ewert & Lovich 2009,	TSD 1a	Ewert & Nelson 1991			1-4	Cagle 1952, Goode 1997							19	Ernst et al. 1994
Graptemys caglei												late spring to early summer	Haynes & Mc Kown 1974	TSD 1a	Wibbels et al. 1991	30	Ewert et al. 1994	2-3	Vermersch 1992							19	Ernst et al. 1994	26	Ernst & Lovich 2009
Graptemys ernsti										Sep - Nov	Ernst et al. 1997a	Apr - Jul	Ernst & Lovich 2009	TSD 1a	Ernst & Lovich 2009			2-6	Shealy 1976, Ernst & Lovich 2009							19	Ernst et al. 1994	23*	Ernst & Lovich 2009	31*	Ernst & Lovich 2009
Graptemys flavimaculata												May - Aug	Ernst & Lovich 2009	TSD 1a	Ernst & Lovich 2009	29-30	Hertwig 2001	1-3	Horne et al. 2003							19	Ernst et al. 1994
Graptemys geographica	hatchlings not tolerant to freezing, hatchlings may overwinter in the nest					-8	Ernst & Lovich 2009	27.7	Ernst & Lovich 2009	spring and autumn		May - Jul	Ernst & Lovich 2009	TSD 1a	Bull & Vogt 1979, Ewert & Nelson 1991			2	Vogt 1980	Aug - Sep	Gibbons & Nelson 1978	0.5-6.0	Crocker et al. 2000			19	Ernst et al. 1994
Graptemys nigrinoda										late spring - summer	Lahanas 1982	May - Aug	Lahanas 1982	TSD 1a	Hertwig 2001			1-5	Lahanas 1982, Goode 1997	Aug - Oct	Lahanas 1982	10	Waters 1974			19	Ernst et al. 1994
Graptemys oculifera										Apr	Jones 1991	May - Jul	Jones 2006	TSD 1a	Hertwig 2001	29 - 30	Hertwig 2001									19	Ernst et al. 1994
Graptemys ouachitensis	mating season bimodal (Vogt 1980a)	38.9	Hutchinson et al. 1966	41	Ernst & Lovich 2009					Apr and Oct	Vogt 1980	May - Jul	Vogt 1980, Ernst & Lovich 2009	TSD 1a	Bull et al. 1982			1-3	Webb 1961, Vogt 1980, Ewert et al. 2004							19	Ernst et al. 1994	24	Ernst & Lovich 2009	31	Ernst & Lovich 2009
Graptemys pseudogeographica		38.9	Hutchinson et al. 1966	41	Hutchinson et al. 1966					Apr and Oct - Nov	Vogt 1980	May - Jul	Vogt 1980	TSD 1a	Ernst & Lovich 2009	25 - 30 geographic variation	Ernst & Lovich 2009	1-4	Freedberg et al. 2005			4 to 7	Vogt 1980			19	Ernst et al. 1994
Graptemys pulchra												Apr - Aug	Mount 1975	TSD	Bull et al. 1982			6-7	Ernst & Lovich 2009							19	Ernst et al. 1994
Graptemys versa														TSD 1a	Ewert et al. 1994			4	Lindeman 2005							19	Ernst et al. 1994
Malaclemys terrapin	hatchlings tolerant to freezing, adapted to high salinity, may overwinter in the nest, nests are able to endure short term temp up to 46			La. 41.80, Fla. 42.50	Hutchinson et al. 1966	-2.5	Ernst & Lovich 2009			Mar - Apr	Seigel 1980a, Ernst & Lovich 2009	Apr - Sep	Burns & Williams 1972, Burger 1977, Seigel 1980b, Lazell & Auger 1981, Jeyasuria et al. 1994, Feinberg 2003 [2004]	TSD 1a	Sachsse 1984, Ewert & Nelson 1991, Jeyasuria et al. 1994, Roosenberg & Kelly 1996	28.5	Jeyasuria et al. 1994	2-3	Lazell 1979, Feinberg & Burke 2003	Jul - Oct	Burger 1977, Lazell 1979, Mitchel 1994, Butler et al. 2004	5	Dimond 1987			14	Sachsse 1984	20 * observed in nature	Jeyasuria et al. 1994	37* observed in nature	Jeyasuria et al. 1994	x
Pseudemys alabamensis												May - Jun	Meany 1979, Dobie & Bagley 1990	unknown				several	Meany 1979, Dobie & Bagley 1990
Pseudemys concinna	northern hatchlings may overwinter in the nest	39.3	Hutchinson et al. 1966	41.8	Hutchinson et al. 1966					Apr	Thomas & Mount 1973	May - Jul	Aresco 2004, Ernst & Lovich 2009	TSD 1a	Ewert et al. 2004	28.5	Ewert et al. 2004	P.c.c 1-3; P.c.f 1-6	Iverson 2001, Aresco 2004	Aug - Sep	Gibbons & Coker 1977, Buhlmann & Vaughan 1991, Aresco 2004											x
Pseudemys gorzugi	hatchlings may overwinter in nest (Degenhardt 1996)											May - June	Degenhardt 1996					unknown		Aug - Oct	Degenhardt 1996	12; observed active	Degenhardt et al. 1996
Pseudemys nelsoni	sometimes nests in aligator nests, exposure °C for 30 days is lethal (Ewert 1991)			40.42 / 43-44	Hutchinson et al. 1966, Prichard & Greenhood 1968					Oct - Mar /possibly throughout year	Ernst & Lovich 2009	spring & summer / possibly throughout year	Iverson 1977, Jackson 1988	TSD 1a	Ewert ert al. 2004	28.5	Ewert et al. 2004	2-6	Ernst & Lovich 2009	Aug - Oct	Ernst & Lovich 2009											x
Pseudemys peninsularis	hatchlings may overwinter in the nest (Jackson 1994)			40.8	Hutchinson et al. 1966					throuhout the year / peak in fall & winter	Ernst & Lovich 2009	throughout the year / peak fall winter spring	Ernst & Barbour 1972, Iverson 1977, Bancroft et al. 1983, Jackson 1988	TSD 1a	Ewertv & Nelson 1991, Ewert et al. 2004			2-6	Bancroft et al. 1983, Jackson 1988
Pseudemys rubriventris	hatchlings may overwinter in the nest (Swarth 2003 [2004])	38.3	Hutchinson et al. 1966	39.36	Hutchinson et al. 1966			27.6	Nutting & Graham 1993	Apr - Jul	Ernst & Lovich 2009	May - Aug	Ernst & Lovich 2009	unknown						Aug - Oct	Ersnt & Lovich 2009
Pseudemys suwanniensis	hatchlings may overwinter in the nest			43	Pritchard & Greenhood 1968					Jan - Jun	Marchand 1942, 1944, Jackson & Davis 1972, Jackson & Walker 1997	Mar - Aug	Ernst & Lovich 2009	TSD 1a	Jackson & Walker 1997, Ewert et al. 2004	28	Jackson & Walker 1997, Ewert et al. 2004	4	Ernst & Lovich 2009	Aug - Sep	Ernst & Lovich 2009
Pseudemys floridana	in Ernst & Lovich treated as subspecies P.c.f.			40.85	Hutchinson et al. 1966					Apr - May	Dundee & Rossman 1989	Apr - Jul	Aresco 2004	TSD	Ewert & Nelson 1991																	x
Pseudemys texana												May - Jun	Ernst & Lovich 2009	TSD 1a	Ewert et al. 2004	28	Ewert et al. 2004	2-4	Garrett & Barker 1987	Aug - Sep	Garrett & Barker 1987, Vermersch 1992
Terrapene carolina	hatchlings may overwinter in the nest	Ga. 40.1; Va.40.7; Md. 41.4	Hutchinson et al. 1966	La. 42.53; R.I.42.57; Ga.42.60; Va. 42.65; Md. 43.00	Hutchinson et al. 1966	-1.5	Russo 1972	28 to 32	Ernst & Lovich 2009	Apr - Oct / throughout the year	Schwartz & Schwartz 1974, Williams & Parker 1987, Dundee & Rossman 1989, Jackson 1991, Ernst et al. 1997a, Farell et al. 2006	Apr - Oct	Mitchell 1994, Dodd 1997a	TSD amb	Dimond 1983, Ewert & Nelson 1991, Ewert et al. 2004			1-5	Tucker et al. 1978	Sep - Dec	Schwartz 1968	17, 14	Dodd et al. 1994, Kassab 2003, Farell et al. 2006					23 (22 lethal)	Dodge et al.1978, Dimond 1985	34 (35 lethal)	Dodge et al. 1978, Dimond 1985	x
Terrapene ornata	late eggs survive two days of 4.5°C (Legler 1960a), hatchlings 3 days of -2.5 (Constanzo et al. 1995, Dinkelackert et al. 2005 a)			41	Plummer et al. 2003	1.2 experienced in hibernation	Doroff & Keith 1990	30	Legler 1960	Apr - Oct	Blair 1976	May - Jul	Ernst & Lovich 2009	TSD 1a	Vogt & Bull 1982			1-2	Legler 1960			7	Grobman 1990									x
Trachemys gaigeae	hatchlings may overwinter in the nest (Morjan & Stuart 2001)									Apr - May	Ernst & Lovich 2009	May - Jul	Morjan & Stuart 2001	TSD 1a	Ernst & Lovich 2009			1-3	Stuart & Painter 2006	Aug - Sep	Morjan & Stuart 2001
Trachemys scripta	hatchlings may overwinter in the nest	Ga. 39.5; Okla. 40.9	Hutchinson et al. 1966	Ga. 41; okla.41.80	Hutchinson et al. 1966	1.8	Zhang et al. 2003	28	Ernst & Lovich 2009	Mar - Oct	Cagle 1950, Ernst & Barbour 1972, Lovich et al. 1990	Apr - Aug	Cagle 1950, Webb 1961, Ernst & Barbour 1972, Gibbons et al. 1982, Jackson 1988a, Ernst et al. 1997a, Aresco 2004,	TSD 1a	Paukstis & Janzen 1990, Ewert & Nelson 1991, Janzen & Paukstis 1991, Ewert et al. 1994, Crews 1996, Wibbels et al. 1998, Crews 2003, Ewert et al. 2004			1-5	Ernst & Lovich 2009	summer - fall	Cagle 1944, Gibbons & Nelson 1978	10, 2.4	Cagle 1950, Lardie 1980									x
Kinosternon arizonense	estivation of the eggs 332 days (Ewert 1985, 1991)									Jul	Smith & Hensley 1957, Iverson 1989	Jul - Aug	Iverson 1989, Ernst & Lovich 2009	TSD 2	Ewert et al. 2004			2-3		next year, Jul - Aug	Ewert 1985, 1991
Kinosternon barurii	some perform diapause (Ewert 1985,1991)	39.8	Hutchinson et al. 1966	40.6	Hutchinson et al. 1966					summer - fall	Meshaka & Blind 2001	all months / Jun - Nov	Ernst & Lovich 2009	TSD amb	Ewert et al. 2004			1-6	Wilson et al. 1999	Feb - Apr, Sep - Oct	Mushinsky & Wilson 1992
Kinosternon flavescens	hatchlings supercooling capacity -9.3 (Constanzo et al. 2001 b), hatchlings may overwinter in the nest (Christiansen & Gallaway 1984)	39.7	Mahmoud 1969	43.25	Mahmoud 1969	-2.6	Constanzo et al. 1995	25.06	Mahmoud 1969	spring - May	Ernst & Lovich 2009	May - Aug, peak in June	Iverson 1990, Iverson 1999, Tuma 2006	TSD amb	Vogt et al. 1982, Ewert et al. 2004			1-2	Ernst & Lovich 2009	Aug - Oct	Ernst & Lovich 2009	18	Mahmoud 1969	32	Mahmoud 1969	16	Mahmoud 1969
Kinosternon hirtipes	diapause (Ewert 1985, 1991)											May - Sep	Iverson 1981, Iverson et al. 1991, Iverson 1999	TSD 1a	Ewert et al. 2004			2-4	Ernst & Lovich 2009
Kinosternon sonoriense	eggs require chilling and perform diapause									Apr - May	Iverson 1981, Hulse 1982	May - Sep	Hulse 1982, Iverson 1999	TSD 1a	Ewert et al. 2004			1-4	Ernst & Lovich 2009
Kinosternon integrum	embryonic diapause											May - Sep	Iverson 1999					4	Iverson 1999
Kinosternon subrubrum	eggs perform diapause, some estivate	38.8	Mahmoud 1969	40.95	Mahmoud 1969					Mar - May	Ernst & Lovich 2009	May - Jun	Ernst et al. 2001, Orr & Ernst 2002	TSD 1a	Ewert et al. 2004			1-4	Iverson 1979, Fratzer et al. 1991	Aug - Sep	Ewert 1991	16	Ernst & Lovich 2009	36	Ernst & Lovich 2009	13	Ernst & Lovich 2009	21.5*		30*		x
Sternotherus carinatus	hatchlings little resistance to freezing, some hatchlings may overwinter in the eggs (Kelderman 1992)	38.7	Mahmoud 1969	42.2	Mahmoud 1969			33.29	Ernst & Lovich 2009	Mar	Becker 1992	Apr - Jun	Ernst et al. 1997b	TSD 2	Ewert et al. 2004					Aug - Sep	Kelderman 1992	14	Ernst & Lovich 2009	34	Ernst & Lovich 2009	16	Ernst & Lovich 2009
Sternotherus depressus				unknown	Ernst & Lovich 2009	unknown	Ernst & Lovich 2009					Jun - Jul	Ernst & Lovich 2009	TSD	Ewert & Nelson 1991			1-3	Ernst & Lovich 2009			17	Ernst & Lovich 2009
Sternotherus minor		38.3	Hutchinson et al. 1966	40.4	Hutchinson et al. 1966					Mar - Apr & Sep - Nov	Zappalorti & Iverson 2006, Ernst & Lovich 2009	May - Jul, Sep - Jul	Zappalorti & Iverson 2006	TSD 2	Ewert et al. 2004, Zappalorti & Iverson 2006			1-5	Iverson 1978, Etchberger & Erhart 1987													x
Sternotherus odoratus		38.7	Mahmoud 1969	La 41.03; R.I.41.08; 40.25	Hutchinson et al. 1966; Mahmoud 1969					throughout the year, peaks: Apr - May & Sep - Dec	Ernst 1986b, Ernst & Lovich 2009	Feb - Aug	Ernst 1986b, Ernst & Lovich 2009	TSD 2	Vogt et al. 1982, Clark et al. 1986, Ewert et al. 2004			1-6	Iverson & Meshaka 2006			10	Mahmoud 1969	35	Mahmoud 1969	13	Ernst & Lovich 2009					x
Gopherus agassizii		39	Hutchinson 1966	39.5 /43.1	McGinnis & Voigt 1971, Hutchinson 1966	4.3	Ernst & Lovich 2009			Mar - Nov	Tomko 1972, Luckenbach 1982, Medica et al. 1982, Rostal et al. 1994	Apr - Aug, Sep - Oct	Luckenbach 1982, Murray et al. 1996, Averill-Murray 2000b, Averill-Murray et al. 2002	TSD 1a		31.3-31.8		2-3	Luckenbach 1982	Aug - Oct	Ernst & Lovich 2009	15	Woodbury & Hardy 1948					25	Ernst & Lovich 2009	35.3	Ernst & Lovich 2009
Gopherus berlandieri		40.4	Hutchinson et al. 1966	42.85	Hutchinson et al. 1966					Jun - Sep	Weaver 1970	Apr - Nov	Auffenberg & Weaver 1969, Rose & Judd 1982
Gopherus polyphemus				43.9	Hutchinson et al. 1966					May - Jun, fall	Landers et al. 1980, Diemer 1992a, Butler & Hull 1996, Mushinsky et al. 2006	Apr - Jul	Taylor 1982	TSD 1a	Ernst & Lovich 2009	29-29.3	Burke et al. 1996, Demuth 2001	1	Epperson & Heise 2003	Aug - Oct	Butler & Hull 1996
Apalone ferox		36.9, 37.4	Hutchinson et al. 1966	39, 42.3	Brattstrom 1965, Hutchinson et al. 1966					unknown	Ernst & Lovich 2009	Mar - Aug	Ernst & Lovich 2009	unknown ?				2-7	Iverson 1985, Iverson & Moler 1997													x
Apalone mutica										Apr - Sep	Plummer & Shirer 1975, Plummer 1977	May - Jul	Ernst & Lovich 2009	GSD	Ewert & Nelson 1991
Apalone spinifera	not tolerant to freezing			41.05	Hutchinson et al. 1966					Apr - May	Ernst & Lovich 2009	May - Aug	Ernst & Lovich 2009	GSD	Bull & Vogt 1979, Janzen & Paukstis 1991, Doody 1999, Greenbaum & Carr 2001																	x
Palea steindachneri				unknown								Apr - Aug	Yang et al. 1998, 2000, Li et al. 2000,	unknown / most likely GSD	Ji et al. 2000			1-4	Ernst & Lovich 2009	Aug - Sept	McKeown & Webb 1982									32 (33 lethal)	Yang et al. 2000
Pelodiscus sinensis				42.3, hatchlings 40.9	Kuzmin 2002, Sun et al. 2002	hatchlings 7.8	Sun et al. 2002	20-25, hatchlings 28-30.3	Khozatsky 1981, Sun et al. 2002	May - Jul	Mitsukuri 1905, Fukada 1965	May - Aug	Ernst & Lovich 2009	unknown	Ernst & Lovich 2009			2-3	Chen et al. 2006	Aug	Ernst & Lovich 2009	15	Mitsukuri 1905, Kuzmin 2002					23	Choo & Chou 1987	34	Choo & Chou 1987
Rhinoclemmys pulcherrima		39.5	Hutchinson et al. 1966	43.5	Hutchinson et al. 1966							Sep - Dec	Ernst & Barbour 1989, Bonin et al. 2006	TSD	Ewert & Nelson 1991			1-4	Ernst & Barbour 1989, Bonin et al. 2006
Legend
BM	body mass
BT	body temperature
CT	cloacal temperature
CT max	critical thermal maximum
CT min	critical thermal minimum
ET	environmental temperature
IT	incubation temperature
ST	surface temperature
TSD	temperature dependent sex determination
WT	water temperature
ET
PIT	pivotal incubation temperature
LRA	T with loss of righting ability
La	Lousiana
R.I.	Rhode Island
Ga.	Georgia
Va.	Virginia
Md.	Maryland
Fla.	Florida
Minn.	Minnesota
Tenn.	Tessessee
N.S.	Nova Scotia
Wisc.	Wisconsin
Mich.	Michigan
Okla.	Oklahoma
*	IT range may not represent min and max T where development occurs

## Sheet: References
Literature:
Akre, T. S. B. (2002) Growth, maturity, and reproduction of the wood turtle, Clemmys insculpta (LeConte) in Virginia. Ph.D. diss., George Mason Univ., Fairfax, Virginia.
Allen, E. R. & W. T. Neill (1950) The alligator snapping turtle, Macrochelys temminckii, in Florida. Spec. Publ. Ross Allen´s Rept. Inst. 4: 1-15.
Aresco, M. J. (2004) Reproductive ecology of Pseudemys floridana and Trachemys scripta (Testudines: Emysidae) in Northwestern Florida. J. Herpetol. 38(2):249-256.
Arvisais, M., Bourgeois, J.-C., Masse, D., Daigle, C., Jutras, J., Pardais, S., Bider, R., & E. Lévesque (2001) Écologie dúne population de tortue des bois (Clemmys insculpta) en Mauricie. Nat. Can. 125: 23-28.
Auffenberg, W., & W. G. Weaver, Jr. (1969) Gopherus berlandieri in southeastern Texas.- Bull. Florida St. Mus. Biol. Sci. 13: 141-203.
Averill-Murray, R. C. (2000) Reproduction and activity of desert tortoises at Sugarloaf Mountain, Arizona. Sonoran Herpetol. 13: 98-101.
Averill-Murray, R. C., Woodman, A. P. & J. M. Howland (2002) Population ecology of the desert tortoise in Arizona, p. 109-134. In: T.R. Van Devender (ed.). The Sonoran desert tortoise: Natural history, biology and conservation. Univ. Arizona Press, Tucson.
Bancroft, G. T., Godley, J. S., Gross, D. T., Rojas, N. N. Sutphen, D. A. & R. W. McDiarmid (1983) Large scale operations management test of use of the white amur for control of problem aquatic plants: The herpetofauna of lake Conway; Species accounts. Misc. Pap. A- 83-5. Army Eng. Waterw. Exp. Stn., Vicksberg, Mississippi.
Becker, H. (1992) Beobachtungen bei der Haltung und Nachzucht von Sternotherus carinatus (Gray, 1856). Salamandra 28: 9-13.
Bichard, G. F. & G. C. Packard (1997) Cardiac activity in supercooled hatchlings of the painted turtle (Chrysemys picta). J. Herpetol. 31: 166-169.
Blair, W. F. (1976) Some aspects of the biology of the ornate box turtle, Terrapene ornata. Southwest. Natur. 21: 89-103.
Bleakney, S. (1963) Notes on the distribution and life histories of turtles in Nova Scotia. Canadian Field-Natur. 77: 67-76.
Bobyn, M. L. & R. J. Brooks (1994) Interclutch and interpopulation variation in the effects of hatchling turtles (Chelydra serpentina). J. Zool. (London) 233: 233-257.
Bonin, F., Devaux, B. & A. Dupré (2006) Turtles of the world. John Hopkins Univ. Press, Baltimore, Maryland.
Brattstrom, B. H. (1965) Body temperatures of reptiles. Am. Midl. Nat. 73: 376-422.
Brown, G. P., Brooks, J. & J. A. Layfield (1990) Radiotelemetry of body temperatures of free-ranging snapping turtles, Chelydra serpentina, during summer. Ca. J. Zool. 68: 1659-1663.
Buhlmann, K. A. & M. R. Vaughan (1991) Ecology of the turtle Pseudemys concinna in the new River, West Virginia. J. Herpetol. 25: 72-78.
Bull, J. J., & R. C. Vogt. (1979) Temperature-dependent sex determination in turtles. Science 206: 1186-1188.
Bull J. J., Vogt, R.C. & M. G. Bulmer (1982) Heritability of sex ratio in turtles with environmental sex determination. Evolution 36: 333-341.
Burger, J. (1977) Determinants of hatching success in diamondback terrapin, Malaclemys terrapin.- Amer. Midl. Natur. 97: 444-464.
Burke, R. L., Ewert, M. A., McLemore, J. B., & D. R. Jackson (1996) Temperature-dependent sex determination and hatching success in the gopher tortoise (Gopherus polyphemus). Chelonian Conservation and Biology (2): 86-88.
Burns, T. A. & K. L. Williams (1972) Notes on the reproductive habits of Malaclemys terrapin pileata. J. Herpetol. 6: 237-238.
Bury, R. B. (1972) Habits and home range of the pacific pond turtle Clemmys marmorata, in a stream community. Ph.D. diss. Univ. California, Berkeley.
Buskirk, J. R. (1991). An overview of the western pond turtle, Clemmys marmorata, pp. 16-23. In: K. R. Beaman, F. Caporaso, S. McKeown & M. D. Graff (eds.). Proceedings of the First International Symposium on Turtles and Tortoises: Conservation and Captive Husbandry. Chapman Univ., Orange, California.
Butler, J. A. & T. W. Hull (1996) Reproduction of the tortoise, Gopherus polyphemus, in northeastern Florida. J. Herpetol. 30: 14-18.
Butler, J. A., Broadhurst, C., Green, M. & Z. Mullin (2004) Nesting, nest predation and hatchling emergence of the Carolina diamondback terrapin, Malaclemys terrapin centrata, in northeastern Florida. Am. Midl. Nat. 152(1):145-155.
Cagle, F. R. (1944) Activity and winter changes of hatchling Pseudemys. Copeia 1944: 105-109.
Cagle, F. R. (1950) The life history of the slider turtle, Pseudemys scripta troostii (Holbrook). Ecol. Monogr. 20: 31-54.
Cagle, F. R. (1952) A Louisiana terrapin population (Malaclemys). Copeia 1952: 74-76.
Chen, Q.-S., Zhang, L., Chen, X.-W. & X.-K. Han (2006) Ultrastructure of spermatozoon in soft-shelled turtle Trionyx sinensis. Acta Zool. Sinica 52: 415-423.
Choo, B. L. & L. M. Chou (1987) Effect of temperature on the incubation period and hatchability of Trionyx sinensis Weigmann eggs. J. Herpetol. 21: 230-232.
Christiansen, J. L. & B. J. Gallaway (1984) Racoon removal, nesting success, and hatchling emergence in Iowa turtles with special reference to Kinosternon flavescens (Kinosternidae). Southwest. Nat. 29: 343-348.
Clark, P. J., Ewert, M. A. & C. E. Nelson (1986) Physiological aspects of temperature dependent sex. Proc. Indiana Acad. Sci. 95: 519.
Conant, R. (1951) The reptiles of Ohio. Univ. Notre Dame Press, Notre Dame, Indiana. 284 pp.
Congdon, J. D. & D. W. Tinkle (1982) Reproductive energetics of the painted turtle (Chrysemys picta). Herpetologica 38: 228-237.
Congdon, J. D., Tinkle, D. W., Breitenbach, G. L. & R. C. van Loben Sels (1983) Nesting ecology and hatching success in the turtle, Emydoidea blandingi. Herpetologica 39: 417-429.
Constanzo, J. P., Iverson, J. B., Wright, M. F. & R. E. Lee Jr. (1995) Cold hardiness and overwintering strategies of hatchlings in an assemblage of northern turtles. Ecology 76: 1772-1785.
Constanzo, J. P., Litzgus, J. D., Iverson, J. B., & R. E. Lee Jr. (2001) Cold- hardiness and evaporative water loss in hatchling turtles. Physiol. Biochem. Zool. 74: 510-519.
Crews, D. (1996) temperature-dependent sex determination: The interplay of steroid hormones and temperature. Zool. Sci. (Japan) 13: 1-13.
Crews, D. (2003) Sex determination: Where environment and genetics meet. Evol. Develop. 5: 50-55.
Crocker et al. (2000) Physiology of common map turtles (Graptemys geographica) hibernating in the Lamoille River, Vermont. J. Exp. Zool. 286: 143-148.
Degenhardt, W. G., Painter, C. W. & A. H. Price (1996) Amphibians & reptiles of New Mexico. Univ. New Mexico Press, Albuquerque. 431 pp.
Diemer, J. E. (1992) Home range and movements of the tortoise Gopherus polyphemus in northern Florida. J. Herpetol. 26: 158-165.
Dimond, M. T. (1983) Sex of turtle hatchlings as related to incubation temperature. Proc. 6th Reptile Symp. Captive Prop. Husb. Zool. Conserv. (Thurmont, Maryland, 1982), pp. 88-101.
Dimond, M. T. (1985) Some effects of temperature on turtle egg incubation, p. 35-39. In: C. G. Suresh & C. B. L. Srivastava (eds.). Recent advances in developmental biology of animals. Indian Soc. Develop. Biol., Poona.
Dimond, M. T. (1987) The effects of incubation temperature on hatching time, sex, and growth of hatchlings of the diamondback terrapin, Malaclemys terrapin (Schoepff). Pranikee 8: 1-5.
Dinkelackert, S. A., Costanzo, J. P. & R. E. Lee Jr. (2005) Anoxia tolerance and freeze tolerance in hatchling turtles.- J. Comp. Physiol. B 175: 209-217.
Dobie, J. L. & F. M. Bagley (1988) Recovery plan for the red-bellied turtle (Pseudemys alabamensis). U.S. Fish Wildl. Serv. Tech. Rev. Draft, 20 pp.
Dodd, C. K., Jr. (1997). Clutch size and frequency in Florida box turtles (Terrapene carolina bauri): implications for conservation. Chelonian Conserv. Biol. 2: 370-377.
Dodd, C. K., Jr., Franz, R. & L. L. Smith (1994) Activity patterns and habitat use of box turtles (Terrapene carolina bauri) on a Florida island, with recommendations for management. Chelonian Conserv. Biol. 1: 97-106.
Dodge, C. H. Dimond, M. T. & C. C. Wunder (1978) Effect of temperature on the incubation time of eggs of the eastern box turtle (Terrapene carolina carolina Linné), p. 8-11. In: G. E. Henderson (ed.). Proceedings of the Florida and Interregional Conference on Sea Turtles. Florida Mar. Res. Bull. 33.
Doody, J. S. (1999) A test of the comparative influences of constant and fluctuating incubation temperatures on phenotypes of hatchling turtles. Linnaeus Fund research Report. Chelon. Conserv. Biol. 3: 529-531.
Doroff, A. M., & L. B. Keith (1990) Demography and ecology of an ornate box turtle (Terrapene ornata) population in south-central Wisconsin. Copeia 1990: 387-399.
Dundee, H. A. & D. A. Rossman (1989) The amphibians and reptiles of Louisiana. Louisiana St. Univ. Press, Baton Rouge. 300 pp.
Epperson, D. M. & C. D. Heise (2003) Nesting and hatchling ecology of gopher tortoises (Gopherus polyphemus) in southern Mississippi. J. Herpetol. 37: 315-324.
Ernst, C. H. (1971a) Observations on the egg and hatchling of the American turtle, Chrysemys picta. British J. Herpetol. 4: 224-227.
Ernst, C. H. (1971b) Observations of the painted turtle, Chrysemys picta. J. Herpetol. 5: 216-220.
Ernst, C. H. (1972) Temperature-activity releationship in the painted turtle, Chrysemys picta. Copeia 1972: 217-222.
Ernst, C. H. (1986a) Environmental temperatures and activities in the wood turtle, Clemmys insculpta. J. Herpetol. 20: 222-229.
Ernst, C. H. (1986b) Ecology of the turtle, Sternotherus odoratus, in southeastern Pennsylvania. J. Herpetol. 20: 341-352.
Ernst, C. H., Altenburg, R. G. M. & R. W. Barbour (1997a) Turtles of the World. ETI Information Systems Ltd, Netherlands. Available online at: http://wbd.etibioinformatics.nl/bis/turtles.php, access: 21/05/2012.
Ernst, C. H., & R. W. Barbour (1972) Turtles of the United States. Univ. Press Kentucky, Lexington. 347 pp.
Ernst, C. H. & R. W. Barbour (1989) Turtles of the World. Smithsonian Inst. Press, Washington, D. C. 313 pp.
Ernst, C. H., Belfit, S. C., Sekscienski, S. W. & A. F. Laemmerzahl (1997b) The amphibians and reptiles of Ft. Belvoir and Northern Virginia. Bull. Maryland Herpetol. Soc. 33: 1-62.
Ernst, C. H., Creque, T. R. & K. A. Hansknecht (2001) Kinosternon subrubrum (eastern mud turtle): Early nesting. Herpetol. Rev. 32: 104.
Ernst, C. H. & J. E. Lovich (2009) Turtles of the United States and Canada. The John Hopkins University Press, Baltimore. 827pp.
Ernst, C. H., J. E. Lovich, & R. W. Barbour (1994) Turtles of the United States and Canada. Smithsonian Inst. Press, Washington and London, 578 pp.
Ernst, C. H., & G. R. Zug (1994) Observations on the reproductive biology of the spotted turtle, Clemmys guttata, in southeastern Pennsylvania. J. Herpetol. 28:99-102.
Etchberger, C. R. & L. M. Ehrhart (1987) The reproductive biology of the female loggerhead musk turtle, Sternotherus minor minor, from the southern part of its range in central Florida. Herpetologica 43: 66-73.
Ewert, M. A. (1976) Nests, nesting and aerial basking of Macroclemys under natural conditions, and comparisons with Chelydra (Testudines: Chelydridae). Herpetologica 32: 150-156.
Ewert, M. A. (1985) Embryology of turtles, p 75-267. In: C. Gans, F. Billett & P.F.A. Maderson (eds.). Biology of the Reptilia, Vol. 14: Development A. John Wiley and Sons, New York.
Ewert, M. A. (1991) Cold torpor, diapause, delayed hatching and aestivation in reptiles and birds, p. 173-191. In: D. C. Deeming & M. W. Ferguson (eds.). Egg incubation: Its effects on embryonic development in birds and reptiles. Cambridge Univ. Press, New York.
Ewert, M. A., Etchberger, C. R. & C. E. Nelson (2004) Turtle sex-determination modes and TSD patterns, and some TSD pattern correlates, p. 21-32. In: N. Valenzuela and V. A. Lance (eds.). Temperature-dependent sex determination in vertebrates. Smithsonian Ins. Press, Washington, D. C.
Ewert, M. A. & D. R. Jackson (1994) Nesting ecology of the alligator snapping turtle (Macrochelys temminckii) along the Apalachicola River, Florida. Florida Game Fresh Water Fish Comm., Nongame Wildl. Progr. Tech. Rep. NC89-020 Tallahassee.
Ewert, M. A., Jackson, D. R. & K. A. Buhlmann (2006a) Deirochelys reticularia - Chicken turtle. Chelon. Res. Monogr. 3: 249-259.
Ewert, M. A., Jackson, D. R. & P. E. Moler (2006b) Macrochelys temminickii - Aligator snapping turtle. Chelonian res. Monogr. 3: 58-71.
Ewert, M. A., Jackson, D. R. & C. E. Nelson (1994) Patterns of temperature- dependent sex determination in turtles. J. Exp. Zool. 270: 3-15.
Ewert, M. A., & C. E. Nelson (1991) Sex determination in turtles: diverse patterns and some possible adaptive values. Copeia 1991: 50-69.
Farell, T. M., Dodd, C. K. Jr. & P. G. May (2006) Terrapene carolina - Eastern box turtle. Chelon. Res. Monogr. 3: 235-248.
Feinberg, J. A. & R. L. Burke (2003) Nesting ecology and predation of diamondback terrapins, Malaclemys terrapin, at Gateway National Recreation Area, New York. J. Herpetol. 37: 517-526.
Feinberg, J. A. (2003) [2004] Nest predation and ecology of terrapins, Malaclemys terrapin terrapin, at the Jamaica Bay Wildlife Refuge, p 5-12. In: C. W. Swarth, W. M. Roosenburg and E. Kiviat (eds.). Conservation and ecology of turtles of the Mid-Atlantic Region: A symposium. Bibliomania, Salt Lake City, Utah.
Frazer, N. B., J. W. Gibbons, & J. L. Greene (1991) Life history of the common mud turtle Kinosternon subrubrum in South Carolina, USA. Ecology 72: 2218-2231.
Freedberg, S., Ewert, M. A., Ridenhour, B. J., Neiman, M. & C. E. Nelson (2005) Nesting fidelity and molecular evidence for natal homing in the freshwater turtle, Graptemys kohnii. Proc. Royal Soc. London B 272: 1345-1350.
Fukada, H. (1965) Breeding habits of some Japanese reptiles (critical review). Bull. Kyoto Gak. Univ. Ser. B 27: 65-82.
Gibbons, J. W. (1969) Ecology and population dynamics of the chicken turtle, Deirochelys reticularia. Copeia 1969: 669-676.
Gibbons, J. W. & J. W. Coker (1977) Ecological and life history aspects of the cooter, Chrysemys floridana (LeConte). Herpetologica 33: 29-33.
Gibbons, J. W. & J. L. Greene (1978) Selected aspects of the ecology of the chicken turtle, Deirochelys reticularia (Latreille) (Reptilia, Testudines, Emydidae).- J. Herpetol. 12: 237-241.
Gibbons, J. W. & J. L. Greene (1979) X-ray photography: a technique to determine reproductive patterns of freshwater turtles. Herpetologica 35: 86-89.
Gibbons, J. W. & J. L. Greene (1990) Reproduction in the slider and other species of turtles. In: J. W. Gibbons (ed.). Life history and ecology of the slider turtle, pp. 124-134. Smithsonian Inst. Press, Washington, D. C.
Gibbons, J. W., Greene, J. L. & K. K. Patterson (1982) Variation in reproductive characteristics of aquatic turtles. Copeia 1982: 776-784.
Gibbons, J. W. & D. H. Nelson (1978) The evolutionary significance of delayed emergence from the nest by hatchling turtles. Evolution 32: 297-303.
Gist, D. H., Michaelson, J. A. & J. M. Jones (1990) Autumn mating in the painted turtle, Chrysemys picta. Herpetologica 46: 331-336.
Goode, M. (1997) Eggs and clutch production of captive Graptemys, p.478. In: J. A. Abbema (ed.). Proceedings: Conservation, Restoration, and Management of Tortoises and Turtles - An International Conference. New York Turtle Tort. Soc., New York.
Goodman, R. H. (1997) The biology of the southwestern pond turtle (Clemmys marmorata pallida) in the Chino Hills Stae Park and the west Fork of the San Gabriel River. Master’s thesis, California St. Polytech. Univ., Pomona.
Gräf, A., Gilhen, J. & J. D. Adams (2003) The wood turtle, Glyptemys insculpta, at River Denys: A second population for Cape Breton Island, Nova Scotia. Can. Field- Nat. 117: 415-418.
Graham, T. E. & T. S. Doyle (1979) Dimorphism, courtship, eggs, and hatchlings of the Blanding´s turtle, Emydoidea blandingii (Reptilia, Testudines, Emydidae) in Massachusetts. J. Herpetol. 13: 125-127.
Greenbaum, E. B. & J. L. Carr (2001) Sexual differentiation in the spiny softshell turtle (Apalone spinifera), a species with genetic sex determination. J. Exp. Zool. 290: 190-200.
Grimpe, R. (1987) Maintenance, behavior, and reproduction of the alligator snapping turtle, Macroclemys temminckii, at the Tulsa Zoological Park. Bull. Oklahoma Herpetol. Soc. 12: 1-6.
Grobman, A. B. (1990) The effect of soil temperatures on emergence from hibernation of Terrapene carolina and T. ornata. Am. Midl. Nat. 124: 366-371.
Gutzke, W. H. N. & G. C. Packard (1987) The influence of temperature on eggs and hatchlings of the Blanding´s turtle Emydoidea blandingii. J. Herpetol. 21: 161-163.
Haas, A. (1985) Ganzjährige freilandhaltung der Schnappschildkröte Chelydra serpentina serpentina (Linneaus, 1758) im Süddeutschen Raum (Testudines: Chelydridae). Salamandra 21: 1-9.
Haynes, D., & R. R. McKown (1974) A new species of map turtle (genus Graptemys) from the Guadalupe River system in Texas. Tulane Stud. Zool. Bot. 18: 143-152.
Hertwig S. (2001) Ökologie, Haltung und Fortpflanzung im Terrarium von Graptemys cageli und G. oculifera. Salamandra 37: 21-48.
Holcomb, S.R., & J. L. Carr (2011) Hatchling Emergence From Naturally Incubated Alligator Snapping Turtle (Macrochelys temminckii) Nests in Northern Louisiana. Chelonian Conservation and Biology 10(2): 222-227
Holland, D. C. (1988) Clemmys marmorata (western pond turtle). Behavior. Herpetol. Rev. 19: 87-88.
Holland, D. C. (1994) The western pond turtle: habitat and history. Final Report. U.S. Dept. Energy Proj. No. 92-068. 302 pp.
Horne, B. D., Braumann, R. J. Moore, M. J. C. & R. A. Seigel (2003) Reproductive and nesting ecology of the yellow-blotched map turtle (Graptemys flavimaculata). Copeia 2003: 729-738
Hulse, A. C. (1982) Reproduction and population structure in the turtle, Kinosternon sonoriense. Southwest. Nat. 27: 447-456.
Hutchinson, V. H., Vinegar, A., & R. J. Kosh (1966) Criticalthermal maxima in turtles. Herpetologica 22(1): 32-41
Iverson, J. B. (1978) Reproductive cycle of female loggerhead musk turtles (Sternotherus minor minor) in Florida. Herpetologica 34: 33-39.
Iverson, J. B. (1979) Reproduction and growth of the mud turtle, Kinosternon subrubrum (Reptilia, Testudines, Kinosternidae), in Arkansas. J. Herpetol. 13: 105-111.
Iverson, J. B. (1981) Biosytematics of the Kinosternon hirtipes species group (Testudines: Kinosternidae). Tulane Stud. Zool. Bot. 23: 1-74.
Iverson, J. B. (1985) Reproduction in the Florida softshell turtle, Trionyx ferox. Florida Scientist 48: 41-44.
Iverson, J. B. (1989) The Arizona mud turtle, Kinosternon flavescens arizonense (Kinosternidae), in Arizona and Sonora. Southwest. Nat. 34: 356-368.
Iverson, J. B. (1990) Nesting and parental care in the mud turtle, Kinosternon flavescens. Can. J. Zool. 68: 230-233.
Iverson, J. B. (1999) Reproduction in the Mexican Mud Turtle Kinosternon integrum. Journal of Herpetology 33(1): 144-148
Iverson, J. B. (2001) Reproduction of the river cooter, Pseudemys concinna, in Arkansas and across ist range. Southwest. Nat. 46: 364-370.
Iverson, J. B. & P. E. Moler (1997) The female reproductive cycle of the Florida softshell turtle (Apalone ferox). J. Herpetol. 31: 399-409.
Iverson, J. B., & G. R. Smith (1993) Reproductive ecology of the painted turtle (Chrysemys picta) in the Nebraska Sandhills and across its range. Copeia 1993: 1-21.
Jackson, D. R. (1988) Reproductive strategies of sympatric freshwater emydid turtles in northern peninsular Florida. Bull. Florida St. Mus. Biol. Sci. 33: 113-158.
Jackson, D. R. (1991) Multiple clutches and nesting behavior in the Gulf Coast box turtle. Florida Field Natur. 19: 14-16.
Jackson, D. R. (2003) Graptemys barbouri (Barbour´s map turtle). Herpetol. Rev. 34:164.
Jackson, C. G. Jr. & J. D. Davis (1972) Courtship display behavior of Chrysemys concinna suwanniensis. Copeia 1972: 385-387.
Jackson, D. R. & J. B. Jensen (2003) Macrochelys temminckii (aligator snapping turtle): Reproduction. Herpetol. Rev. 34: 362-363.
Jackson, D. R. & R. N. Walker (1997) Reproduction in the Suwannee cooter, Pseudemys concinna suwanniensis. Bull. Florida Mus. Nat. Hist. 41: 69-167.
Janzen, F. J. (1992) Hertiable variation for sex ratio under environmental sex determination in the common snapping turtle (Chelydra serpentina). Genetics 131: 155-161.
Janzen, F. J. & G. L. Paukstis (1991) A preliminary test of the adaptive significance of environmental sex determination in reptiles. Evolution 45: 435-440.
Jeyasuria, P., Roosenburg, W. M. & A. R. Place (1994), Role of P-450 aromatase in sex determination of the diamondback terrapin, Malaclemys terrapin. J. Exp. Zool. 270: 95-111.
Jones, R. L. (1991) Density and Population structure of the ringed sawback turtle, Graptemys oculifera (Baur). Final Rep. Mississippi Dept. Wildl. Fish. Parks, Mus. Nat. Sci. Mus. Tech. Rep. 17: 1-55.
Jones, R. L. (2006) Reproduction and nesting of the endangered ringed map turtle, Graptemys oculifera, in Mississippi. J. Herpetol. 29: 426-436.
Joyal, L. A., McCollough, M. & M. L. Hunter Jr. (2000) Population structure and reproductive ecology of blanding´s turtle (Emydoidea blandingii) in Maine, near the northeastern edge of its range. Chelon. Conserv. Biol. 3: 580-588.
Kassab, A. T. (2003) A study of a population of eastern box turtles (Terrapene carolina carolina) in Catawba County, North Carolina. J. North Carolina Acad. Sci. 119: 75.
Kelderman, D. (1992) De Muskusschildpadden Kinosternon carinatum, K. Odoratum en K. m. minor in het terrarium. Lacerta (Utrecht) 50: 98-102.
Khozatsky, L. I. (1981) Some peculiar features of heat exchange exhibited by the soft-shelled turtle Trionyx sinensis (Weigm.), p. 113-117. In: L. J. Borkin (ed.). Herpetological ivestigations in Siberia and the Far East. Leningrad.
Kuzmin, S. L. (2002) The turtles of Russia and other ex-Soviet republics. Edition Chimaira. Anders S. Brahm, Frankfurt am Main, Germany.
Lahanas, P. N. (1982) Aspects of the life history of the southern black-knobbed sawback, Graptemys nigrinoda delticola Folkerts and Mount. Master’s thesis, Auburn University, Auburn, Alabama.
Landers, J. L., J. A. Garner, & W. A. McRae (1980) Reproduction of gopher tortoises (Gopherus polyphemus) in southwestern Georgia. Herpetologica 36: 353-361.
Lardie, L. R. (1980) Winter activity of Chrysemys scripta elegans (Wied-Neuwied) in north central Texas. Bull. Oklahoma Herpetol. Soc. 4: 72-76.
Lazell, J. D. Jr. (1979) Diamondback terrapins at Sandy neck. Aquasphere, J. New England Aquar. 13: 28-31.
Lazell, J. D. Jr. & P. J. Auger (1981) Predation on diamondback terrapin (Malaclemys terrapin) eggs by dunegrass (Ammophila breviligulata). Copeia 1981: 723-724.
Legler, J. M. (1960). Natural history of the ornate box turtle, Terrapene ornata ornata Agassiz. Univ. Kansas Publ. Mus. Natur. Hist. 11: 527-669.
Li, Y., Zhang, H., Li, Z. & J. Ding (2000) The breeding ecology of Trionyx steindachneri. J. Shanghai Fisheries Univ. 9: 72-74.
Ligon, D.B. & M.B. Lovern (2009) Temperature Effects During Early Life Stages of the Alligator Snapping Turtle (Macrochelys temminckii). Chelonian Conservation & Biology. 8(1): 74-83
Lindeman, P. V. (2005) Aspects of the life history of the Texas map turtle (Graptemys versa). Am. Midl. Nat. 153: 378-388.
Litzgus, J.D. (2004) Status Report on the Spotted Turtle, Clemmys guttata. Committee on the Status of Endangered Wildlife in Canada (COSEWIC), Environment Canada, Ottawa, ON. Available at:
Litzgus, J.D. & T. A. Mousseau (2003) Multiple clutching in southern spotted turtles, Clemmys guttata. J. Herpetol. 37(1): 17-23.
Lovich, J. E., W. R. Garsta, & C. J. McCoy (1990) The development and significance of melanism in the slider turtle, pp. 233-254. In: J. W. Gibbons (ed.). Life history and ecology of the slider turtle. Smithsonian Inst. Press, Washington, D. C.
Luckenbach, R. A. (1982) Ecology and management of the desert tortoise (Gopherus agassizii) in California, pp. 1.37. In: R. B. Bury (ed.). North American tortoises: conservation and ecology. U. S. Fish Wildl. Serv. Res. Rep. 12.
Mahmoud, I. Y. (1969) Comparative ecology of the kinosternid turtles of Oklahoma. Southwest. Natur. 14: 31-66.
Marchand, L. J. (1942) A contribution to a knowledge of the natural history of certain freshwater turtles. Master´s thesis, Univ. Florida, Gainesville.
Marchand, L. J. (1944) Notes on the courtship of a Florida terrapin. Copeia 1944: 191-192.
McGinnis, S. M. & W. G. Voigt (1971) Thermoregulation in the desert tortoise, Gopherus agassizii. Comp. Bio-chem. Physiol. 40A: 119-126.
Meany, D. B. (1979) Nesting habits of the Alabama red-bellied turtle, Pseudemys alabamensis.- J. Alabama Acad. Sci. 50: 113.
Medica, P. A., Lyons, C. L. & F. B. Turner (1982) A comparison of 1981 populations of desert tortoises (Gopherus agassizii) in grazed and ungrazed areas in Ivanpah Valley, California. Proc. Symp. Desert Tort. Council 1982: 99-124.
Meshaka, W. E. Jr. & E. Blind (2001) Seasonal movements and reproduction in the striped mud turtle (Kinosternon baurii) from the southern Everglades, Florida. Chelon. Conserv. Biol. 4: 75-80.
Mitchel, J. C. (1994) The reptiles of Virginia. Smithsonian Inst. Press, Washington, D. C.
Mitsukuri, K. (1905) The cultivation of marine and freshwater animals in Japan. The snapping turtle, or softshell tortoise. Bull. U. S. Bur. Fish. 24: 260-266.
Morjan, C. L. & J. N. Stuart (2001) Nesting record of a Big Bend slider turtle (Trachemys gaigeae) in New Mexico, and overwintering of hatchlings in the nest. Southwest. Nat. 46: 230-234.
Mount, R. H. (1975) The reptiles and amphibians of Alabama. Auburn Univ. Agric. Exp. Stat., Auburn, Alabama. 347 pp.
Murray, R. C., Schwalbe, C. R., Bailey, S. J., Cuneo, S. P. & S. D. Hart. (1996) Reproduction in a population of the desert tortoise, Gopherus agassizii, in the Sonoran Desert. Herpetol. Nat. Hist. 4: 83-88.
Mushinsky, H. R., McCoy, E. D., Berish, J. E., Ashton, R. E. Jr. & D. S. Wilson (2006) Gopherus polyphemus - Gopher tortoise. Chelon. Res. Monogr. 3: 350-375.
Nutting, W. L. & T. E. Graham (1993) Preferred bod temperatures in five Nearctic freshwater turtles: A preliminary study. Comp. Biochem. Physiol. 104A: 243-246.
Obbard, M. E. & R. J. Brooks (1981) A radio-telemetry and mark-recapture study of activity in the common snapping turtle, Chelydra serpentina. Copeia 1981: 630-637.
Orr, J. M. & C. H. Ernst (2002) Kinosternon subrubrum subrubrum (eastern mud turtle). Catesbeiana 22: 19.
Pappas, M. J., Brecke, B. J. & J. D. Congdon (2000) The blanding´s turtles (Emydoidea blandingii) of Weaver Dunes, Minnesota. Chelon. Conserv. Biol. 3: 557-568.
Paukstis, G. L., & F. J. Janzen (1990) Sex determination in reptiles: summary of effects of constant temperatures of incubation on sex ratios of offspring. Smithsonian Herpetol. Infor. Serv. 83: 1-28.
Plummer, M. V. (1977) Notes on the courtship and mating behavior of the softshell turtle, Trionyx muticus (Reptilia, Testudines, Trionychidae). J. Herpetol. 11: 90-92.
Plummer, M. V. & H. W. Shirer (1975) Movement patterns in a river population of the softshell turtle Trionyx muticus. Occ. Pap. Mus. Nat. Hist. Univ. Kansas 43: 1-26.
Plummer, M. V., Williams, B. K., Skiver, M. M. & J. C. Carlyle (2003) Effects of dehydration on the critical thermal maximum of the desert box turtle (Terrapene ornata luteolata). J. Herpetol. 37: 747-750.
Powders, V. N. (1978) Observations of oviposition and natural incubation of eggs of the alligator snapping turtle, Macroclemys temminckii, in Georgia. Copeia 1978: 154-156.
Powell, C. B. (1967) Female sexual cycles of Chrysemys picta and Clemmys insculpta in Nova Scotia. Can. Field-Natur. 81: 134-140.
Pritchard, P. C. H. (1989) The alligator snapping turtle: biology and conservation. Milwaukee Public Mus., Milwaukee, Wisconsin. 104 pp.
Pritchard, P. C. H. & W. Greenhood (1968) The sun and the turtle. Int. Turtle Tort. Soc. J. 2(1): 20-25.
Reese, D. A. & H. H. Welsh Jr. (1997) Use of terrestrial habitat by western pond turtles Clemmys marmorata: Implications for management, p. 352-357. In: J. Van Abbema (ed.). Proceedings: Conservation, Restauration, and Management of Tortoises and Turtles - An International Conference. New York Tortle Tort. Soc., New York.
Refsnider, J. & P. Schlick (2006) Emydoidea bandingii (Blanding´s turtle): Double clutching. Herpetol. Rev. 37: 341-342.
Rhodin, A. G. J. & G. H. Mittelhauser (1994) Maximum size and clutch size records for eastern painted turtles, Chrysemys picta picta, from mid-coastal Maine. Chelonian Conserv. Biol. 1(2): 148-150.
Roosenberg, W. M. & P. J. Kelly (1996) The effect of egg size and incubation temperature on growth in the turtle, Malaclemys terrapin. J. Herpetol. 30: 198-204.
Rose, F. L., & F. W. Judd. (1982) The biology and status of Berlandier's tortoise (Gopherus berlandieri), pp. 57-70. In: R. B. Bury (ed.). North American tortoises: conservation and ecology. U. S. Fish Wildl. Serv. Res. Rep. 12.
Rostal, D. C., Lance, V. A., Grumbles, J. S. & A. C. Alberts (1994) Seasonal reproductive cycle of the desert tortoise (Gopherus agassizii) in the eastern Mojave Desert. Herpetol. Monogr. 8: 72-82.
Rowe, J. W. (1992) Observations of body size, growth, and reproduction in Blanding's turtle (Emydoidea blandingii) from western Nebraska. Can. J. Zool. 70: 1690-1695.
Rowe, J. W., & E. O. Moll. (1991) A radiotelemetric study of activity and movements of the Blanding's turtle (Emydoidea blandingii) in northeastern Illinois. J. Herpetol. 25: 178-185.
Russo, P. M.(1972) Behavioral thermoregulation and energy budget of the eastern box turtle, Terrapene carolina carolina (Linne). Ph.D. diss., Rutgers Univ., New Brunswick, New Jersey.
Sachsse, W. (1984) Long term studies of the reproduction of Malaclemys terrapin centrata, p. 297-308. In: V. L. Bels & A. P. Van den Sande (eds.). Maintainance and reproduction of reptiles in captivity, Vol. 1. Acta Zool.Path Antwerp. 78.
Sanderson, R. A. (1974) Sexual dimorphism in the Barbour's map turtle, Malaclemys barbouri (Carr and Marchand). Master’s thesis, Univ. South Florida, Tampa.
Schuett, G. W. & R. E. Gatten Jr. (1980) Thermal preference in snapping turtles (Chelydra serpentina). Copeia 1980: 149-152.
Schwartz, C. W. & E. R. Schwartz (1974) The three toed box turtle in central Missouri: Its population, home range, and movements. Missouri Dept. Conderv. Terr. Ser. 5: 1-28.
Schwartz, S. R. (1968) December emergence of hatchling Terrapene carolina in Philadelphia, PA. -Philadelphia Herpetol. Soc. Bull. 16: 20.
Seigel, R. A. (1980a). Courtship and mating behavior of the diamondback terrapin Malaclemys terrapin tequesta.- J. Herpetol. 14: 420-421.
Seigel, R. A. (1980b) Nesting habits of diamondback terrapins (Malaclemys terrapin) on atlantic coast of Florida. Trans. Kansas Acad. Sci. 83: 239-246.
Shealy, R. M. (1976) The natural history of the Alabama map turtle, Graptemys pulchra Baur.- Alabama. Bull. Florida St. Mus. Biol. Sci. 21: 47-111.
Smith, P. W. & M. M. Hensley (1957) The mud turtle, Kinosternon flavescens stegnegeri Hartweg, in the United States. Proc. Biol. Soc. Washington 70: 201-204.
Standing, K. L., Herman, T. B. & I. P. Morrison (1999) Nesting ecology of Blanding´s turtle (Emydoidea blandingii) in Nova Scotia, the northeastern limit of the species’ range. Can. J. Zool. 77: 1609-1614.
Standing, K. L., Herman, T. B., Shallow, M., Power, T. & I. P. Morrison (2000) Results of nest protection program for the blanding´s turtle in Kejimkujik National Park, Canada: 1987-1997. Chelon. Cons. Biol. 3: 637-642.
Stuart, J. N. & C. W. Painter (2006) Trachemys gaigeae (Big Bend Sleider): Peproductive characteristics. Herpetol. Rev. 37: 79.
Sun, P. -Y., Xu, X. -Y., Chen, H. L., & X. Ji (2002) Thermal tolerance, dial variation in body temperature, and thermal dependences of locomotor performance in hatchling soft-shelled turtles, Trionyx sinensis. Chinese J. Appl. Ecol. 13: 1161-1165.
Swarth, C. W. 2003 (2004) Natural history and reproductive biology of the red-bellied turtle (Pseudemys rubriventris), p. 73-83. In: C. W. Swarth, W. M. Roosenburg & E. Kiviat (eds.). Conservation and ecology of turtles of the Mid- Atlantic Region: A symposium. Bibliomania. Salt Lake City, Utah.
Taylor, R. W. Jr. (1982) Seasonal aspects of the reproductive biology of the gopher tortoise, Gopherus polyphemus. Ph.D. diss., Univ. Florida, Gainesville.
Thomas, K. & R. Mount (1973) The annual cycle of reproduction of the turtle, Pseudemys floridana floridana (Testudinata, Testudinidae) with observations on its ecology. ASB Bull. 20: 87.
Tinkle, D. W., Congdon, J. D. & P. C. Rosen. (1981) Nesting frequency and success: implications for the demography of painted turtles. Ecology 62: 1426-1432.
Tomko, D. S. (1972) Autumn breeding of the desert tortoise. Copeia 1972: 895.
Trauth, S. E., Robinson, H. W. & M. V. Plummer (2004) The amphibians and reptiles of Arkansas. Univ. Arkansas Press, Fayetteville.
Tucker, J. K., R. S. Funk, & G. L. Paukstis (1978) The adaptive significance of egg morphology in two turtles (Chrysemys picta and Terrapene carolina). Bull. Maryland Herpetol. Soc. 14: 10-22.
Tuma, M. W. (2006) Range, habitat use, and seasonal activity of the yellow mud turtle (Kinosternon flavescens) in northwestern Illinois: Implications for site-specific conservation and management. Chelon. Conserv. Biol. 5: 108-120.
Vermersch, T. (1992) Lizards and turtles of south-central Texas. Eakin Press, Austin, Texas. 170 pp.
Vogt, R. C. (1980) Natural history of the map turtles Graptemys pseudogeographica and G. ouachitensis in Wisconsin.Tulane Stud. Zool. Bot. 22: 17-48.
Vogt, R. C. (1981) Natural history of amphibioans and reptiles of Wisconsin. Milwaukee Public. Mus., Wisconsin.
Wahlquist, H. & G. W. Folkerts (1973) Eggs and hatchlings of Barbour's map turtle, Graptemys barbouri Carr and Marchand. Herpetologica 29: 236-237.
Walde, A. D., Bider, J. R., Daigle, C., Masse, D., Bourgeois, J.-C., Jutras, J. & R. D. Titman (2003) Ecological aspects of a wood turtle, Glyptemys insculpta, population at the northern limit of ist range in Québec. Can. Field. Nat. 117: 377-388.
Waters, J. C. (1974) The biological significance of the basking habit in the black knobbed sawback, Graptemys nigrinoda Cagle. Master’s thesis, Auburn Univ., Auburn, Alabama.
Weaver, W. G. Jr. (1970) Courtship and combat behavior in Gopherus berlandieri. Bull. Florida St. Mus. Biol. Sci. 15: 1-43.
Webb, R. G. (1961) Observations on the life histories of turtles (genus Pseudemys and Graptemys) in Lake Texoma, Oklahoma. Amer. Midl. Natur. 65: 193-214.
Wibbels, T., Cowan, J. & R. LeBoeuf (1998) Temperature dependent sex determination in the red-eared slider turtle, Trachemys scripta. J. Exp. Zool. 281: 409-416.
Wibbels, T., F. C. Killebrew & D. Crews (1991) Sex determination in Cagle's map turtle: Implications for evolution, development, and conservation. Can. J. Zool. 69: 2693-2696.
Williams, E.C. Jr. & W. S. Parker (1987) A long-term study of a biox turtle (Terrapene carolina) population at Allee Memorial Woods, Indiana, with emphasis on survivorship. Herpetologica 43: 328-335
Wilson, D. S. Mushinsky, H. R. & E. D. McCoy (1999) Nesting behavior of the striped mud turtle, Kinosternon baurii (Testudines: Kinosternidae). Copeia 1999: 958-968.
Wilson, P. R. (1989) Clemmys guttata (spotted turtle). Reproduction. Herpetol. Rev. 20: 69-70.
Woodbury, A. M. & R. Hardy (1948) Studies of the desert tortoise, Gopherus agassizii. Ecol. Monogr. 18: 145-200.
Xiang Ji, Fang Chen, Wei-Guo Du, Hui-Li Chen (2003) Incubation temperature affects hatchling growth but not sexual phenotype in the Chinese soft-shelled turtle, Pelodiscus sinensis (Trionychidae). Journal of Zoology 261(4): 409-416.
Yang, J.-C., Zhou Y.-F., Rao, J.-H., Wu, X.-P., Li, Z.-R. & Z.-J. Zhong (1998) The biologic studies on Palea steindachneri. Zool. Res. (China) 19: 497-499.
Yang, J.-C., Zhou, J.-F., Liang, Q.-S. Rao, J.-H. & Z.-R. Li (2000)Studies on laying and hatching eggs of Palea steindachneri. J. Jinan Univ. (Nat. Sci.) 21: 110-114.
Yntema, C. L. (1978) Incubation times for eggs of the turtle Chelydra serpentina (Testudines: Chelydridae) at various temperatures. Herpetologica 34(3): 274-277.
Zappalorti, R. T. & J. B. Iverson (2006) Sternotherus minor - Loggerhead musk turtle. Chelon. Res. Monogr. 3: 197-206.
Zhang, Y.-P., Pan, C. & X. Ji (2003) Thermal tolerance, body temperature, and thermal dependence of locomotor performance of hatchling red-eared slider turtles, Trachemys scripta elegans. Acta Zool. Sinica 23: 1048-1056.
Yntema, C. L. (1978) Incubation times for eggs of the turtle Chelydra serpentina (Testudines: Chelydridae) at various temperatures.- Herpetologica 34 (3): 274-277.
Zappalorti, R. T. & J. B. Iverson (2006) Sternotherus minor - Loggerhead musk turtle.- Chelon. Res. Monogr. 3: 197-206.
Zhang, Y. - P., Pan, C. & X. Ji (2003) Thermal tolerance, body temperature, and thermal dependence of locomotor performance of hatchling red-eared slider turtles, Trachemys scripta elegans.- Acta Zool. Sinica 23: 1048-1056.
