# Supplementary material for: Evaluating the Significance of Paleophylogeographic Species Distribution Models in Reconstructing Quaternary Range-Shifts of Nearctic Chelonians
Source: PLoS One. 2013 Oct 9;8(10):e72855. doi: 10.1371/journal.pone.0072855 (PMC3794015; doi:10.1371/journal.pone.0072855)
Supplement: Material S1 — Zip file containing Appendices S1 through S7. Appendix S1: Genbank accession numbers of sequences of four mitochondrial genes (COI, control region, cytb, ND4) and three nuclear genes (R35, RAG-1, TB29) used for phylogenetic analyses; Appendix S2: Plots showing the bioclimatic conditions within each species' currently available climate space, its potential niche as well as its realized niche both in terms of species' modern and fossil occurrences; Appendix S3: Fossils of Nearctic chelonians compiled from Holman [61] and supplemented with data obtained through the Paleo Biology Database (available through www.paleodb.org). Negative MESS scores indicate conditions within the species' current realized/potential niche and positive MESS scores indicate bioclimatic conditions outside of the current realized/potential niche; Appendix S4: Videos showing the results of the Maxent and PPGM analyses, i.e. distribution changes through time in comparison to current distributions according to Maxent, non-analogous climate and information on subspecies and phylogenetic lineages; Appendix S5: Comprehensive summary of data on thermal biology of 48 Nearctic chelonian species; Appendix S6: Dated molecular phylogeny for all 59 extant species of Nearctic turtles inferred by Bayesian analyses; Appendix S7: Summary statistics of each 100 Maxent models per species. (ZIP) [file pone.0072855.s001.zip › renamed_91f67/Appendix S7 Rödder et al. - PLos ONE.xls]

## Sheet: Maxent Results
Appendix S7. Summary statistics of each 100 Maxent models per species. Abbreviations are: AUC = Area under the receiver operating characteristic curve; MTP = minimum training presence threshold; 10% om = 10 % training omission threshold
Species	ID		N Train samples	Train AUC	N Test samples	Test AUC		Variable contributions [%]									Thresholds
								BIO2	BIO6	BIO8	BIO10	BIO16	BIO17	BIO18	BIO19		MTP	10% om
Actinemys marmorata	Sp1		129	0.9575	55	0.9369		1.8208	20.0021	4.3495	6.902	4.3481	5.8243	39.7047	17.0485		0.0451	0.3234
Apalone ferox	Sp2		147	0.9449	63	0.9168		1.6814	24.1982	17.7809	29.7067	1.9718	9.4944	10.58	4.5865		0.0278	0.3698
Apalone mutica	Sp3		171	0.8859	73	0.8241		8.0404	8.3485	9.1635	34.7709	25.0179	4.4925	8.0279	2.1383		0.0723	0.3474
Apalone spinifera	Sp4		670	0.8114	286	0.7788		3.0498	28.2607	2.3805	39.9374	4.5364	11.1549	2.1085	8.5718		0.0313	0.3366
Chelydra serpentina	Sp5		838	0.7783	358	0.7522		6.5013	14.2708	2.3968	22.6312	9.1936	22.6858	19.336	2.9845		0.0399	0.325
Chrysemys dorsalis	Sp6		49	0.9418	20	0.9247		5.7248	1.583	5.2764	16.052	5.4143	1.0831	3.668	61.1984		0.1824	0.3226
Chrysemys picta	Sp7		1115	0.8306	477	0.815		9.4014	10.7326	1.7331	52.2636	9.3823	12.063	3.6297	0.7943		0.0062	0.2791
Clemmys guttata	Sp8		304	0.8986	130	0.8614		12.1934	28.604	8.0703	19.9144	3.5467	13.0345	1.1995	13.4371		0.0152	0.3546
Deirochelys reticularia	Sp9		255	0.9158	109	0.891		1.1396	20.9613	13.8934	13.8271	3.399	13.1969	21.1466	12.4361		0.0307	0.2534
Emydoidea blandingii	Sp10		249	0.9181	106	0.8911		26.913	10.7472	5.9736	24.6514	10.152	11.6526	9.0445	0.8656		0.022	0.299
Glyptemys insculpta	Sp11		183	0.9417	78	0.9124		16.3564	7.745	7.6395	16.5457	14.1477	29.8113	7.0967	0.6576		0.0309	0.2852
Glyptemys muhlenbergii	Sp12		66	0.9327	28	0.9087		9.1243	13.7203	9.9966	31.2903	5.5263	24.492	4.9071	0.9433		0.0787	0.2552
Graptemys barbouri	Sp13		18	0.9821	7	0.9712		6.8175	8.8864	14.5795	5.2805	0.9367	1.0995	4.9195	57.4804		0.1653	0.2915
Graptemys caglei	Sp14		10	0.9629	4	0.9475		1.6032	34.7217	0.4502	0.6956	2.7259	18.7593	2.5903	38.4537		0.4974	0.5773
Graptemys ernsti	Sp15		7	0.8475	2	0.7971		2.5389	0.0564	22.5776	23.6438	0.1465	47.3958	0	3.6411		0.3764	0.3764
Graptemys flavimaculata	Sp16		10	0.8878	4	0.8343		42.5391	1.2191	4.3267	3.3966	9.7844	14.6248	9.5209	14.5884		0.3646	0.4677
Graptemys geographica	Sp17		269	0.9067	114	0.875		5.7083	3.9285	7.9811	32.9828	3.9148	33.3769	9.852	2.2556		0.0338	0.3393
Graptemys gibbonsi	Sp18		15	0.9225	6	0.8507		36.3434	12.9974	3.1966	15.9986	0.4275	6.0436	12.4849	12.5081		0.2604	0.3478
Graptemys nigrinoda	Sp19		22	0.8882	9	0.8194		2.9834	3.5562	4.2236	69.6986	8.7087	1.7687	5.6249	3.4358		0.1664	0.3187
Graptemys oculifera	Sp20		13	0.9714	5	0.9531		0.1773	0.3616	11.7813	3.4004	0.1348	7.9812	0.0405	76.123		0.1568	0.3209
Graptemys ouachitensis	Sp21		115	0.9387	49	0.9004		1.9001	4.9794	7.3756	27.0759	15.227	32.7478	8.0944	2.5997		0.0636	0.3231
Graptemys pearlensis	Sp22		16	0.9326	6	0.8594		3.0695	1.6263	17.1672	40.3763	3.4721	18.6996	13.8091	1.7799		0.2327	0.3441
Graptemys pseudogeographica	Sp23		161	0.9255	69	0.8921		10.8073	12.8546	1.9833	30.6269	31.1326	2.8538	3.3513	6.3901		0.0496	0.2993
Graptemys pulchra	Sp24		36	0.9602	15	0.9482		0.8654	13.0662	6.0778	60.6045	1.5537	0.7303	2.2971	14.8049		0.1492	0.3227
Graptemys versa	Sp25		12	0.8952	4	0.8635		1.1182	63.6022	1.3314	1.0244	1.8132	0.0745	6.5947	24.4414		0.2949	0.4339
Kinosternon alamosae	Sp26		21	0.9652	8	0.9505		3.2408	7.8916	70.554	6.3395	0.7876	3.662	7.2073	0.3172		0.166	0.309
Kinosternon arizonense	Sp27		34	0.9793	14	0.9717		0.7236	11.5824	35.5321	3.0352	16.1531	18.4075	5.5113	9.0549		0.0848	0.3116
Kinosternon baurii	Sp28		129	0.9467	55	0.9211		4.3027	25.6123	15.9877	25.5129	1.8998	12.5078	9.1285	5.0483		0.0298	0.3092
Kinosternon durangoense	Sp29		5	0.8057	1	0.7395		6.3691	20.6482	0.8214	44.5339	0.2325	22.5531	0.8179	4.0239		0.4256	0.4256
Kinosternon flavescens	Sp30		408	0.8973	174	0.874		1.9526	6.9814	18.9807	39.9761	15.7397	8.8493	5.4376	2.0826		0.0202	0.324
Kinosternon herrerai	Sp31		23	0.9397	9	0.885		12.979	17.0057	8.9066	1.5403	23.3071	2.5853	29.3576	4.3185		0.1796	0.3153
Kinosternon hirtipes	Sp32		80	0.9549	34	0.9225		7.2848	24.9418	5.3849	3.0715	15.3719	27.8223	6.1584	9.9643		0.0685	0.367
Kinosternon integrum	Sp33		294	0.9158	125	0.8907		5.8301	15.4691	3.7425	1.2163	20.8861	27.7762	3.8184	21.2614		0.0309	0.336
Kinosternon sonoriense	Sp34		84	0.9611	36	0.9315		14.9711	20.2358	21.4024	8.8672	7.345	10.6873	7.5306	8.9607		0.1139	0.367
Kinosternon subrubrum	Sp35		899	0.8861	385	0.8756		2.8969	49.1356	2.3256	4.4008	1.4022	32.1138	0.7962	6.9289		0.0056	0.362
Macrochelys temminckii	Sp36		166	0.9589	71	0.9387		1.4761	12.3013	5.1035	40.7462	17.9751	12.0758	6.7405	3.5814		0.0402	0.3395
Malaclemys terrapin	Sp37		103	0.9702	43	0.954		53.6268	23.9322	1.4754	6.6629	1.6198	2.8882	4.4105	5.3841		0.0312	0.2432
Pseudemys alabamensis	Sp38		9	0.9374	3	0.9184		0.5283	0.5014	39.4538	15.4383	0.5844	9.8491	33.5697	0.075		0.3039	0.3039
Pseudemys concinna	Sp39		336	0.8978	143	0.8711		1.5967	27.4836	4.3035	15.0478	7.5554	32.0319	2.4743	9.5067		0.0383	0.3338
Pseudemys floridana	Sp40		102	0.9491	43	0.9186		1.6433	32.5154	6.4995	17.0929	2.8065	1.7375	8.2725	29.4325		0.0277	0.3089
Pseudemys gorzugi	Sp41		20	0.9398	8	0.8933		10.1258	7.0053	11.4158	57.4501	4.2017	1.6376	5.3691	2.7945		0.1604	0.2814
Pseudemys nelsoni	Sp42		80	0.9636	33	0.9375		1.8018	23.3371	34.0211	6.8339	5.2514	5.0797	21.9359	1.7392		0.1418	0.415
Pseudemys peninsularis	Sp43		121	0.9661	51	0.9486		3.1108	39.5302	28.401	1.4648	0.8959	17.3186	7.1661	2.1126		0.0847	0.3937
Pseudemys rubriventris	Sp44		51	0.9453	21	0.9274		23.4441	49.5196	4.8683	9.3417	12.1239	0.1919	0.1008	0.4098		0.0963	0.2916
Pseudemys texana	Sp45		112	0.934	47	0.887		4.3533	8.261	30.8152	6.7099	16.9054	16.0697	4.6717	12.2138		0.0583	0.3405
Rhinoclemmys pulcherrima	Sp46		49	0.9125	21	0.8739		17.307	41.5164	0.391	0.4966	7.2529	22.837	2.9066	7.2925		0.0871	0.2089
Sternotherus carinatus	Sp47		67	0.9306	28	0.913		6.478	3.7424	11.9018	2.2698	3.3409	30.3865	0.9067	40.9739		0.0719	0.2254
Sternotherus depressus	Sp48		22	0.9612	9	0.9395		8.6779	25.1573	20.3131	22.5657	1.872	10.8473	4.6182	5.9486		0.3389	0.4974
Sternotherus minor	Sp49		154	0.9268	65	0.8869		4.6911	32.1903	3.7223	20.0996	8.5463	3.0719	3.7142	23.9643		0.1051	0.3434
Sternotherus odoratus	Sp50		609	0.8585	261	0.8345		3.5724	18.1288	7.1081	15.085	1.9784	29.0611	3.1293	21.9369		0.0264	0.3514
Terrapene carolina	Sp51		1399	0.8407	599	0.8277		1.3242	28.2983	3.5453	3.026	8.7589	47.0055	0.8801	7.1617		0.0112	0.4056
Terrapene coahuila	Sp52		6	0.9762	2	0.9627		7.1312	43.6856	0.5553	0.1343	4.457	23.5864	20.2601	0.19		0.3898	0.3898
Terrapene nelsoni	Sp53		10	0.8928	4	0.8583		2.0355	57.0502	0.7798	1.4793	0.7996	5.182	26.3164	6.3571		0.3896	0.4616
Terrapene ornata	Sp54		355	0.8711	151	0.8329		2.6423	18.8169	10.8471	44.1813	7.8637	8.2363	5.2108	2.2017		0.0244	0.3764
Trachemys gaigeae	Sp55		24	0.9555	9	0.9385		8.7118	0.4956	25.0929	4.4782	5.012	31.9674	6.809	17.433		0.1126	0.2114
Trachemys nebulosa	Sp56		17	0.9777	6	0.9561		2.5261	32.2985	26.3652	0.0368	1.2029	21.8241	13.3324	2.4141		0.355	0.4441
Trachemys ornata	Sp57		11	0.964	4	0.9571		23.6111	1.8979	21.643	0.0241	1.9568	30.7969	11.8151	8.2552		0.1314	0.2812
Trachemys scripta	Sp58		735	0.859	315	0.8406		2.5909	14.033	1.4926	39.3607	2.3534	19.7413	0.4539	19.9741		0.0155	0.349
Trachemys taylori	Sp59		9	0.9525	3	0.9314		6.3523	52.9528	1.1586	0.7078	20.7068	4.9427	8.1787	5.0005		0.1902	0.1902
Trachemys venusta	Sp60		109	0.9129	46	0.8539		5.9924	5.3403	11.8735	45.1754	3.793	16.764	6.7707	4.2905		0.0604	0.2995
Trachemys yaquia	Sp61		7	0.8908	2	0.8727		0.0992	0.1176	61.3909	35.3565	0.6799	0.5284	1.0884	0.739		0.2754	0.2754
min			5	0.7783	1	0.7395		0.0992	0.0564	0.391	0.0241	0.1348	0.0745	0	0.075		0.0056	0.1902
max			1399	0.9821	599	0.9717		53.6268	63.6022	70.554	69.6986	31.1326	47.3958	39.7047	76.123		0.4974	0.5773
mean			189.18	0.920908	80.4262	0.89117		7.9413	18.863	12.2931	19.2304	7.053	15.0453	8.13925	11.4345		0.132561	0.336113
sd			288.187	0.0463518	123.524	0.0538606		10.2863	15.6148	13.947	17.8975	7.12527	11.994	8.29062	15.3189		0.12701	0.0693439
95% CI upper			754.026	1.01176	322.534	0.996737		28.1025	49.4681	39.6292	54.3096	21.0185	38.5536	24.3889	41.4596		0.3815	0.472027
95% CI lower			-375.666	0.830059	-161.681	0.785604		-12.2199	-11.7421	-15.043	-15.8487	-6.91254	-8.46297	-8.11036	-18.5905		-0.116378	0.200199
