# Supplementary material for: Evaluating the Significance of Paleophylogeographic Species Distribution Models in Reconstructing Quaternary Range-Shifts of Nearctic Chelonians
Source: PLOS journal article supplement (doi:10.1371/journal.pone.0072855), 2013-10-09
Supplement: S1 (10.1371/journal.pone.0072855.s001) [file journal.pone.0072855.s001]

## **Appendix S2**

Rödder, D., A. M. Lawing, M. Flecks, F. Ahmadzadeh, J. Dambach, J. O. Engler, J.

C. Habel, T. Hartmann, D. Hörnes, F. Ihlow, K. Schidelko, D. Stiels, P. D. Polly.

Evaluating the Significance of Paleophylogeographic Species Distribution Models in  
Reconstructing Quaternary Range-shifts of Nearctic Chelonians. PLoS ONE X: XXXX

Plots in E-space of each species showing available climate (light grey), realized niche (dark grey), potential niche (medium grey), and climate associated with fossil occurrences (black, red, green, blue, etc.). Available climate is the climate occurring at points in the level-2 drainage basins occupied by the species. Realized niche points are the climate points associated with the species occurrences in the modern world. Potential niche is the total climate space occupied by the species in the PPGM models. For species with fossils, each fossil occurrence is shown in one of the other colors. For fossils whose age was uncertain, points of the same color show the paleoclimate associated with the fossil occurrence at each time slice at which the fossil could conceivably occurred. For further explanation, see Figure 1 and associated Introduction text.

sp1 – *Actinemys marmorata*

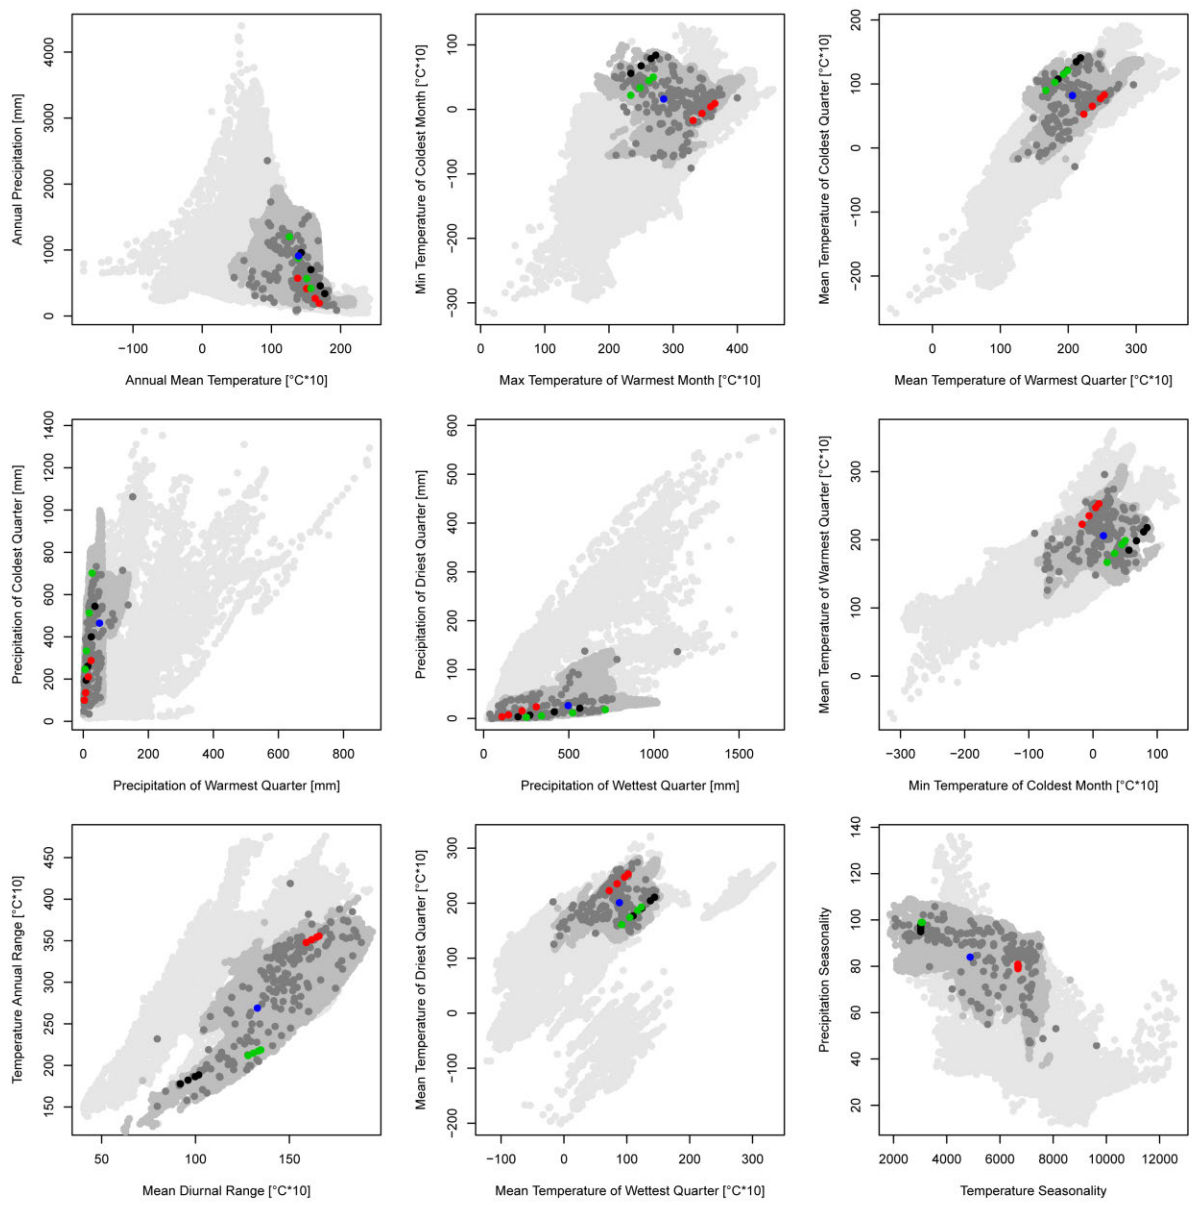

number of samples: 213  
number of fossils: 4

sp2 – *Apalone ferox*

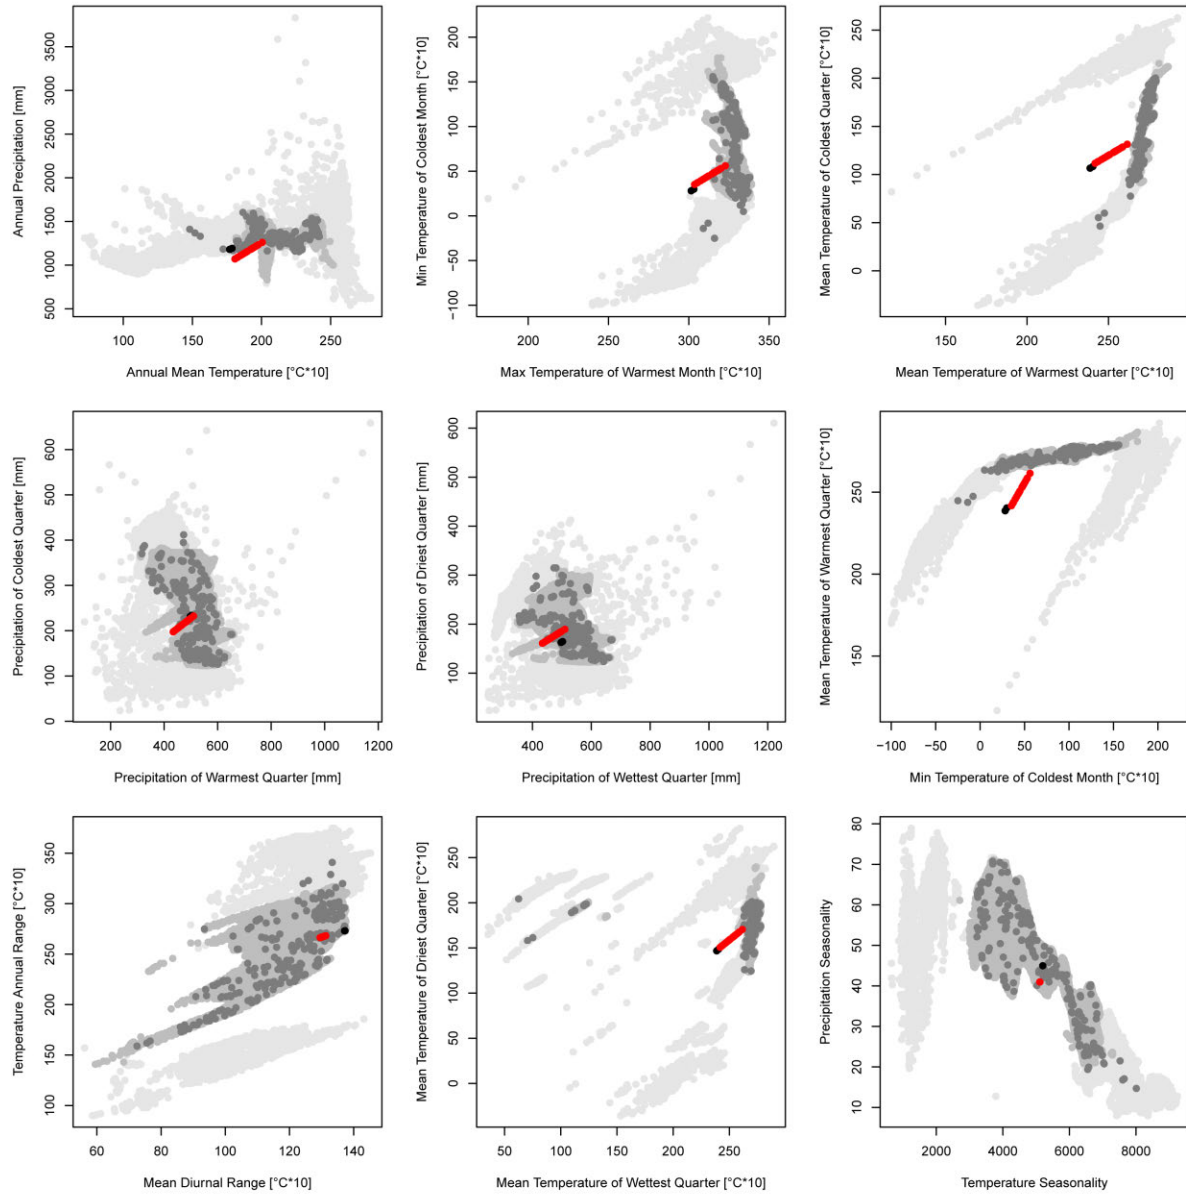

number of samples: 265

number of fossils: 2



sp3 – *Apalone mutica*

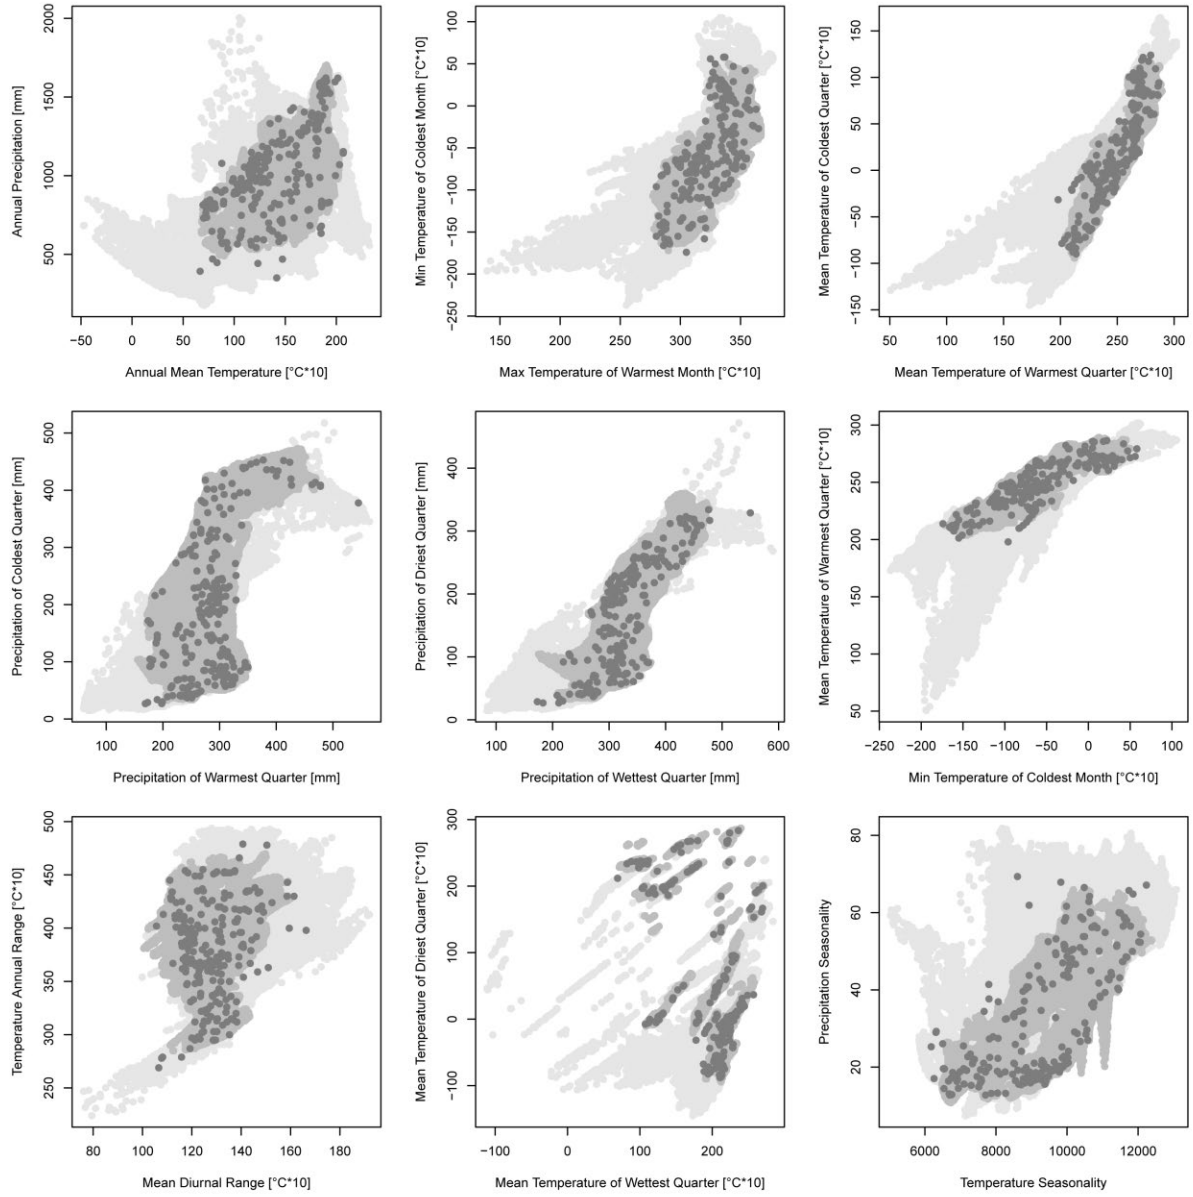

number of samples: 253

number of fossils: 0

sp4 – *Apalone spinifera*

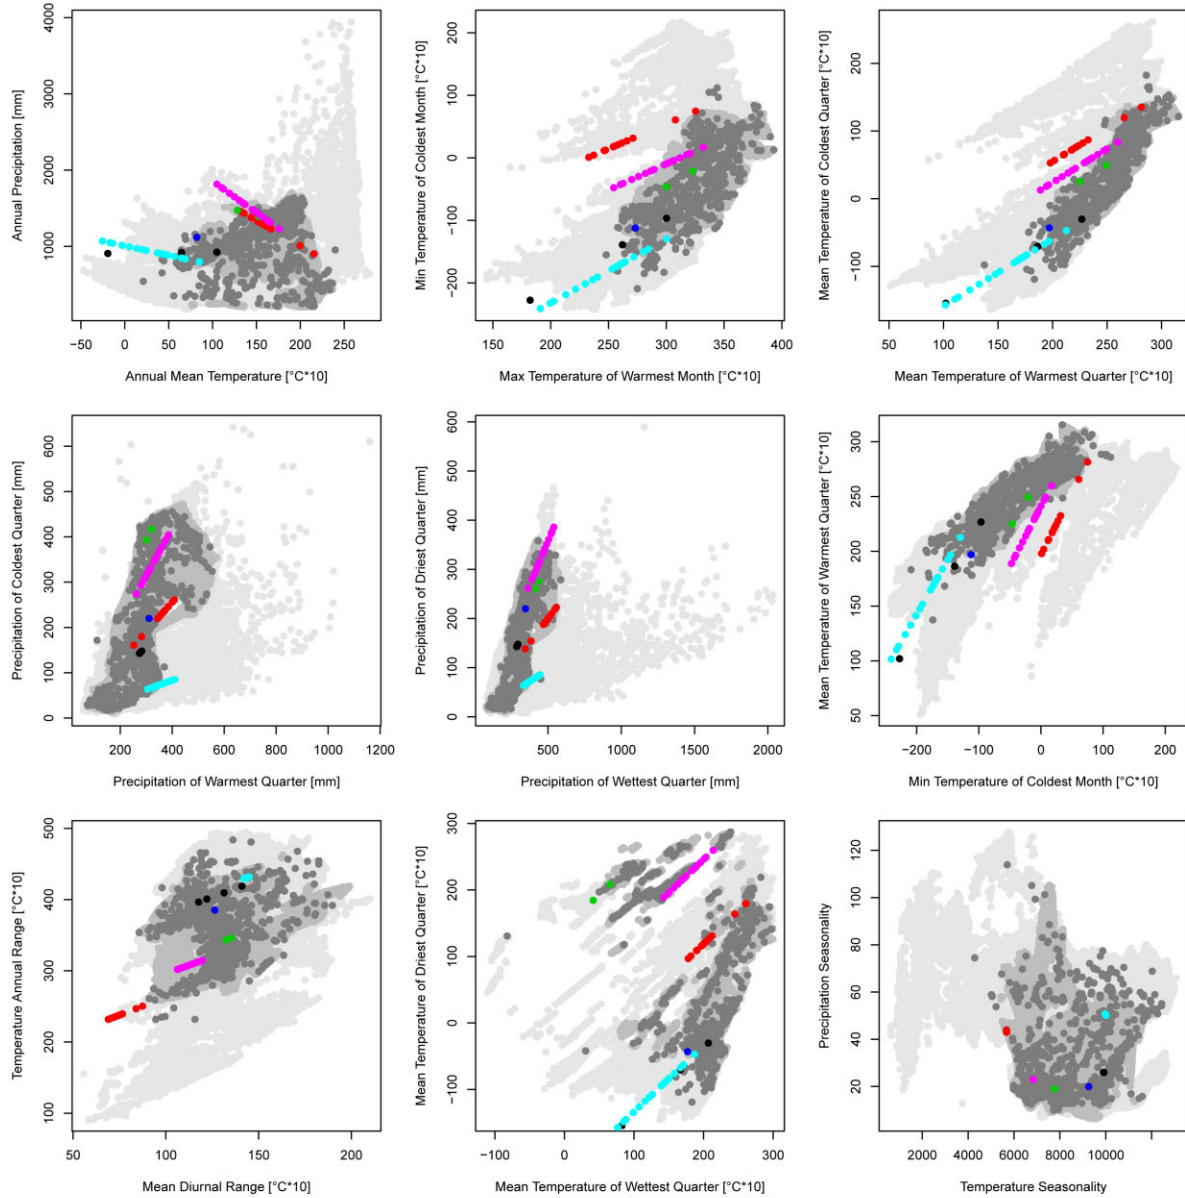

number of samples: 1034

number of fossils: 6

sp5 – *Chelydra serpentina*

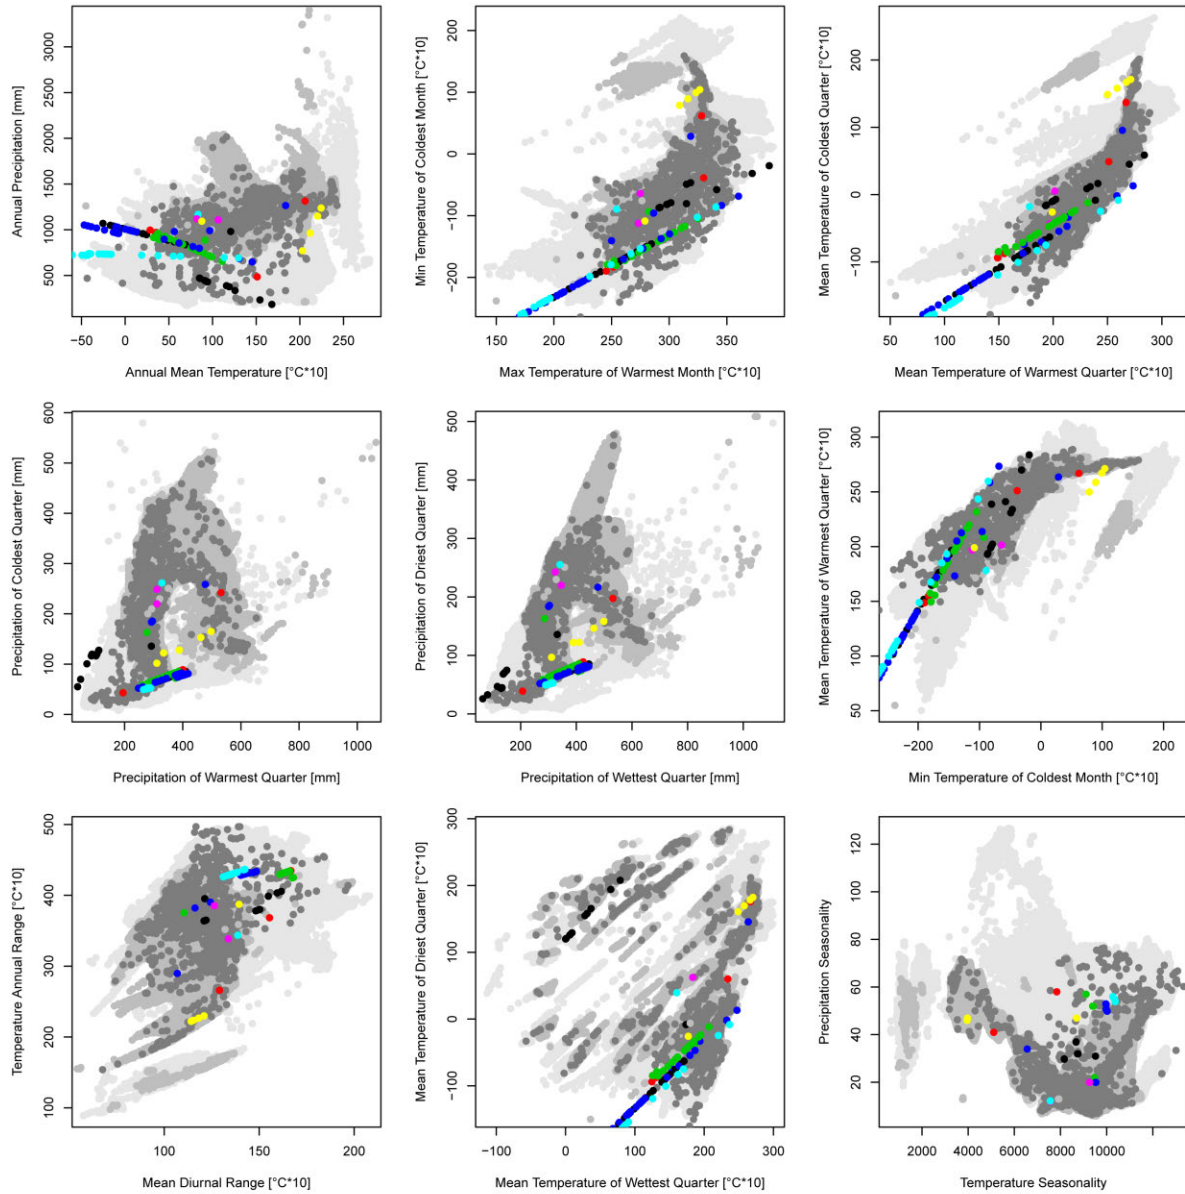

number of samples: 1295

number of fossils: 21

sp6 – *Chrysemys dorsalis*

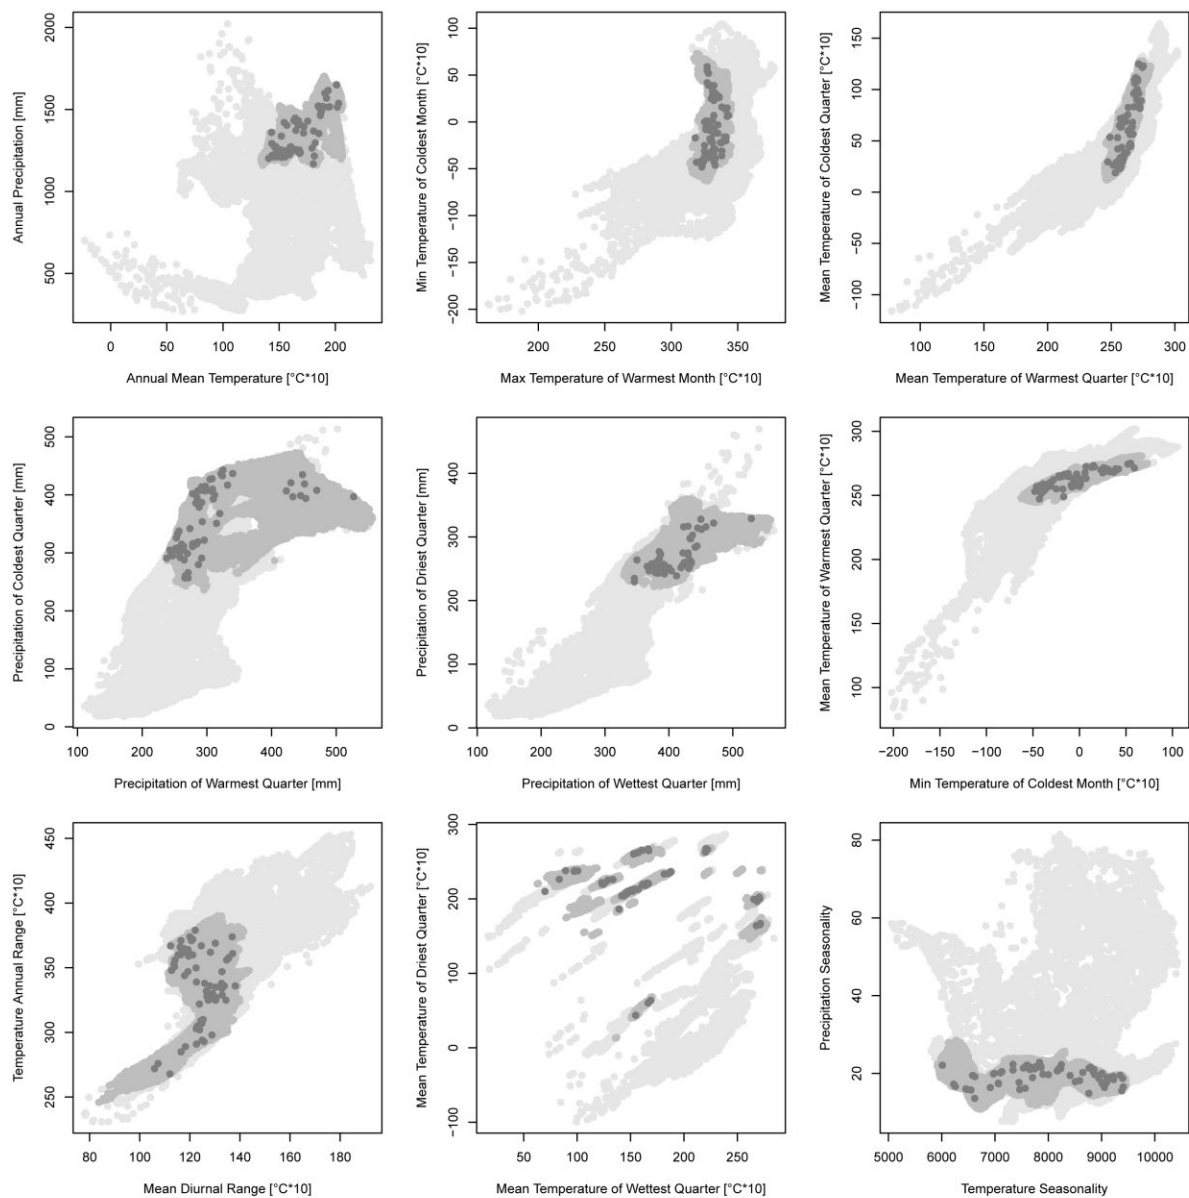

number of samples: 76

number of fossils: 0

sp7 – *Chrysemys picta*

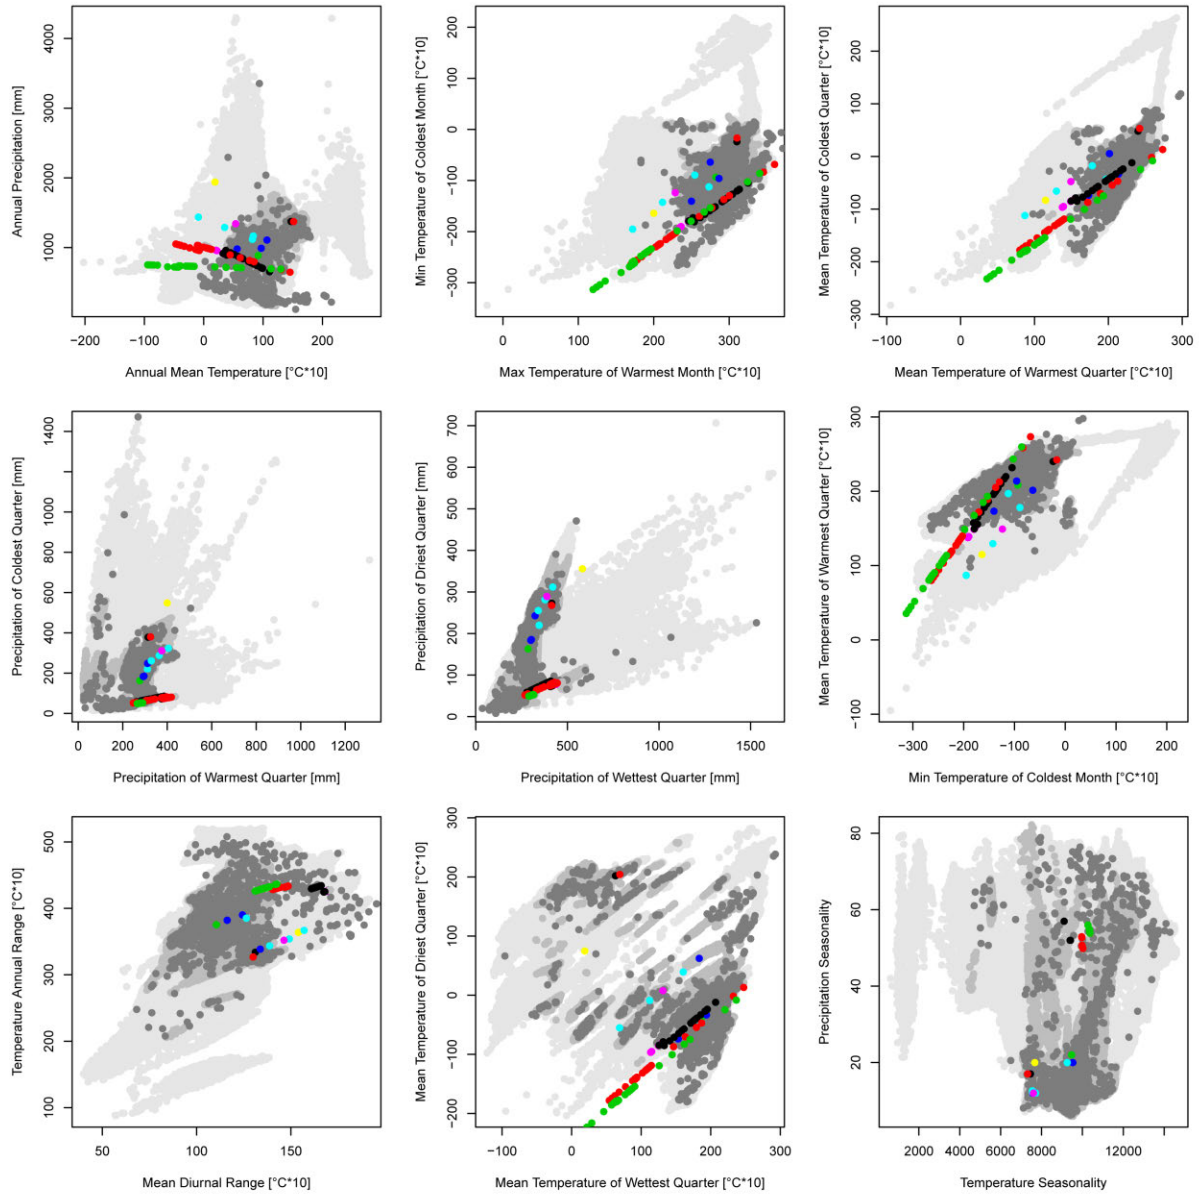

number of samples: 1823

number of fossils: 14

sp8 - *Clemmys guttata*

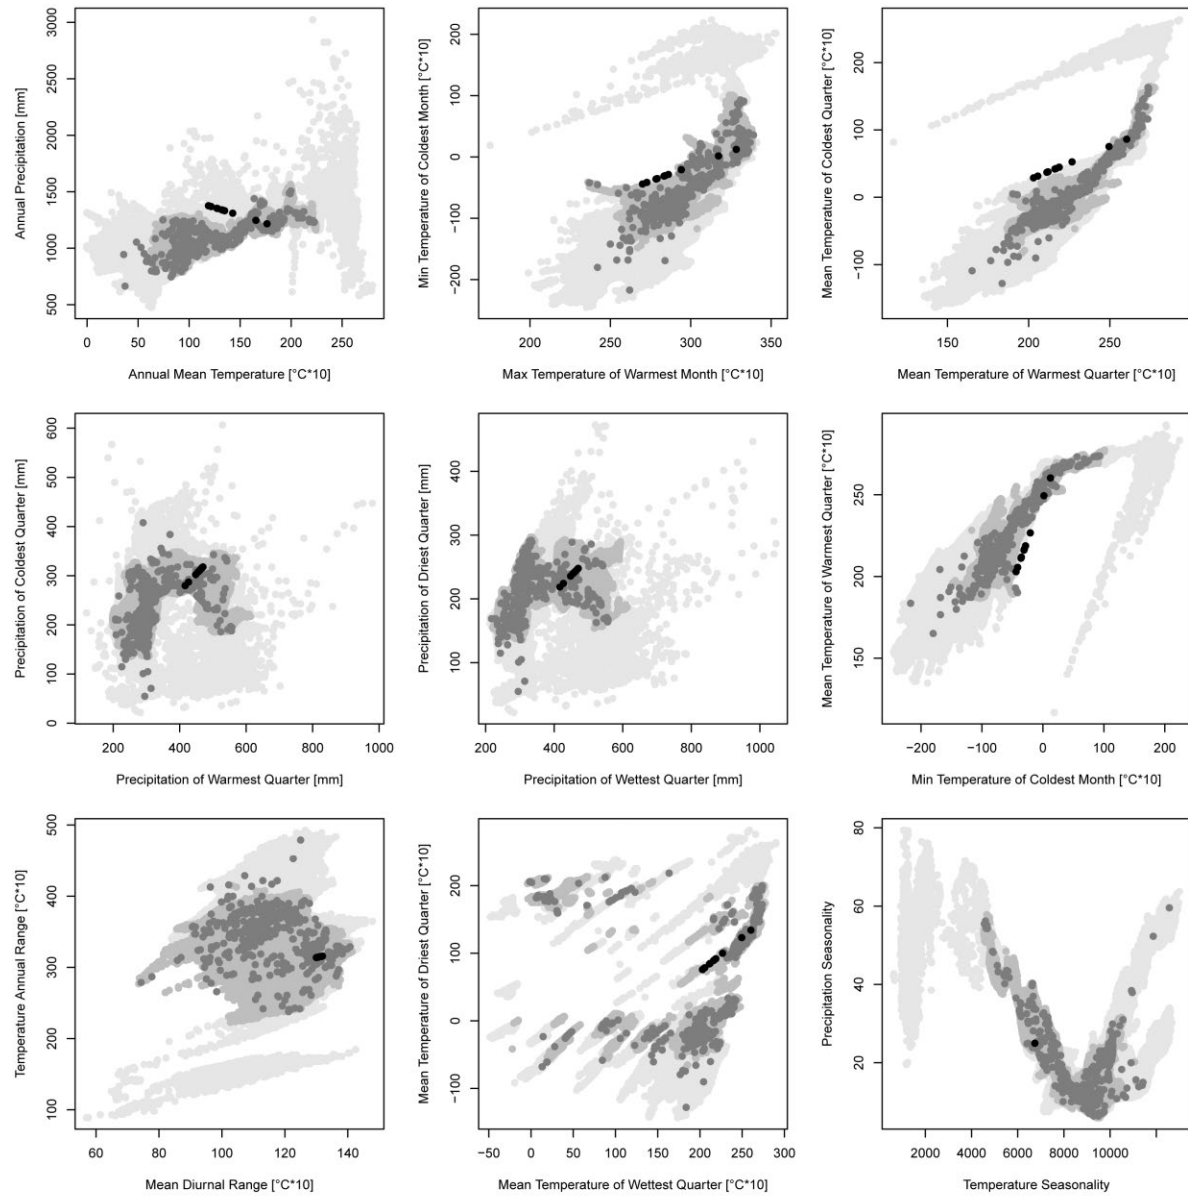

number of samples: 496

number of fossils: 1

sp9 – *Deirochelys reticularia*

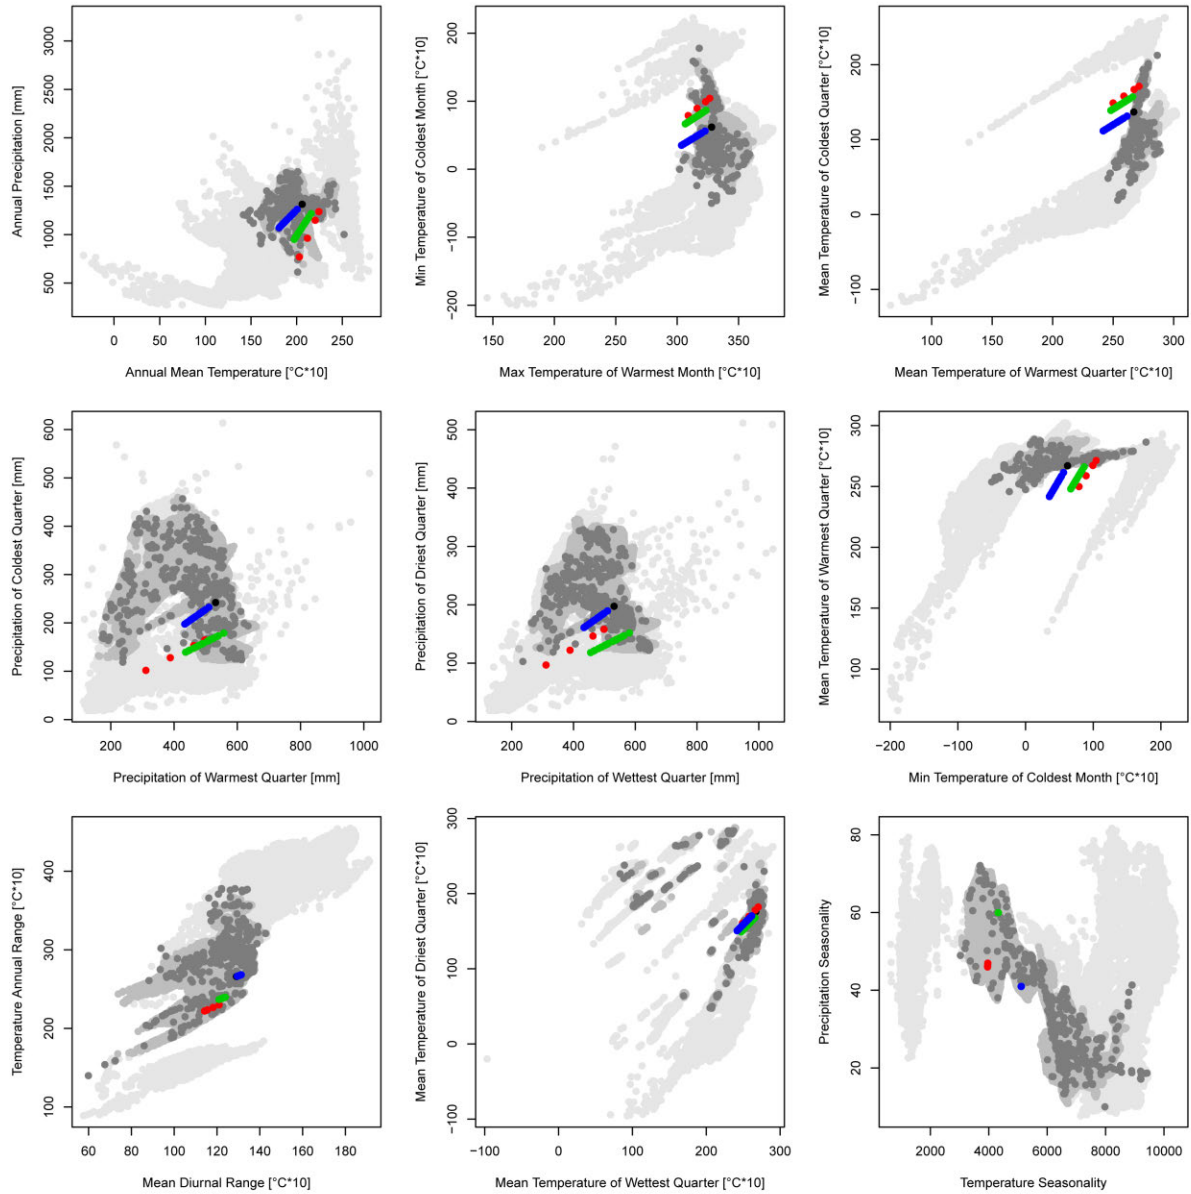

number of samples: 447

number of fossils: 4



sp10 – *Emydoidea blandingii*

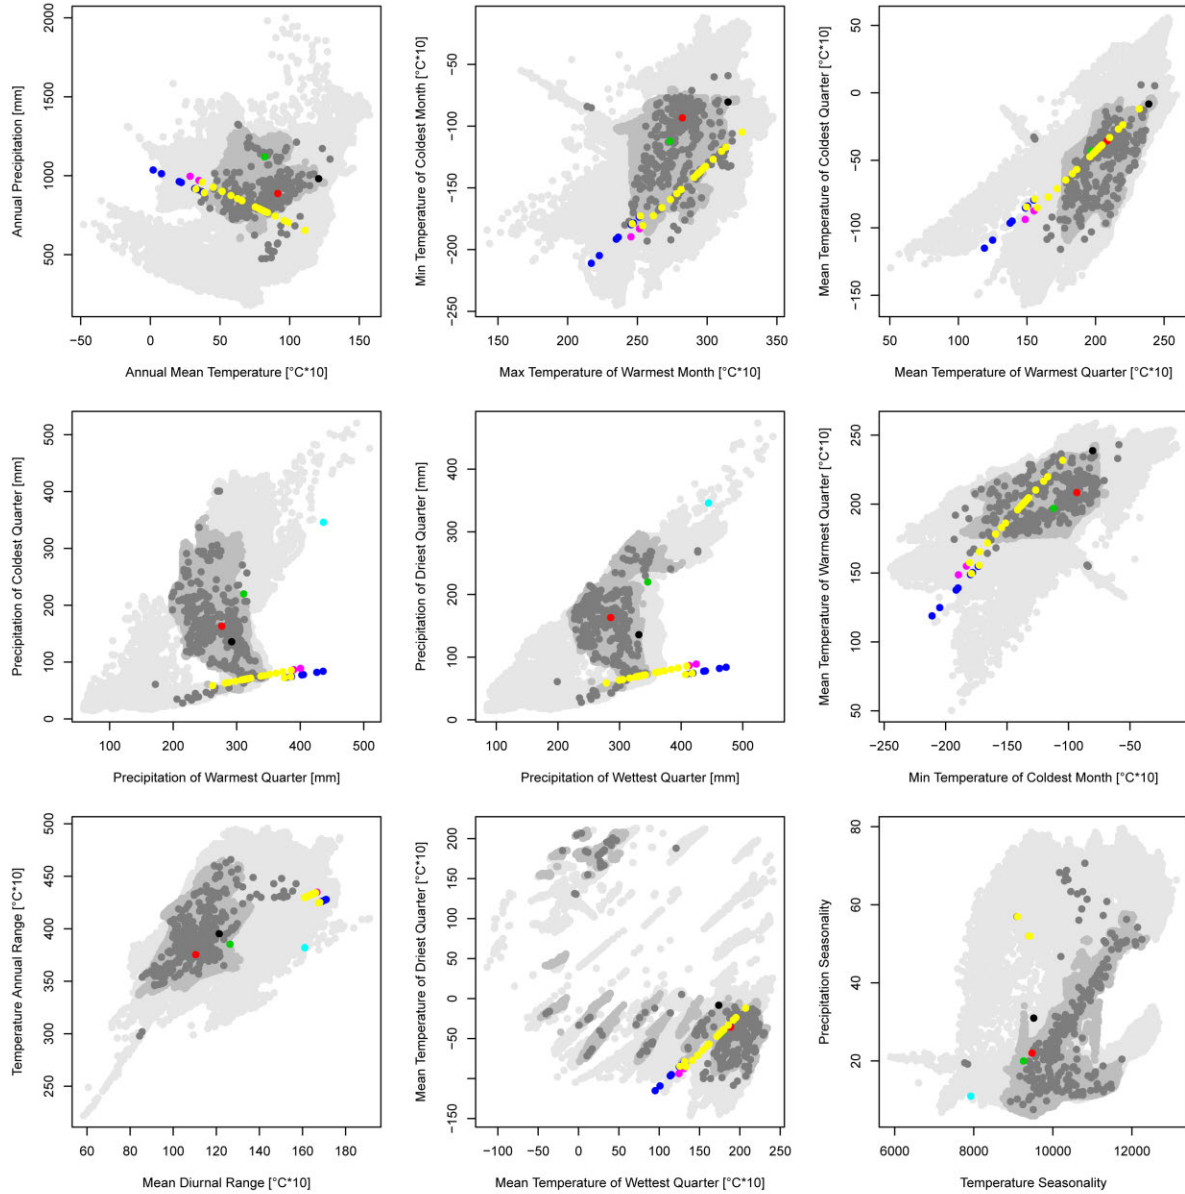

number of samples: 391

number of fossils: 7



sp11 – *Glyptemys insculpta*

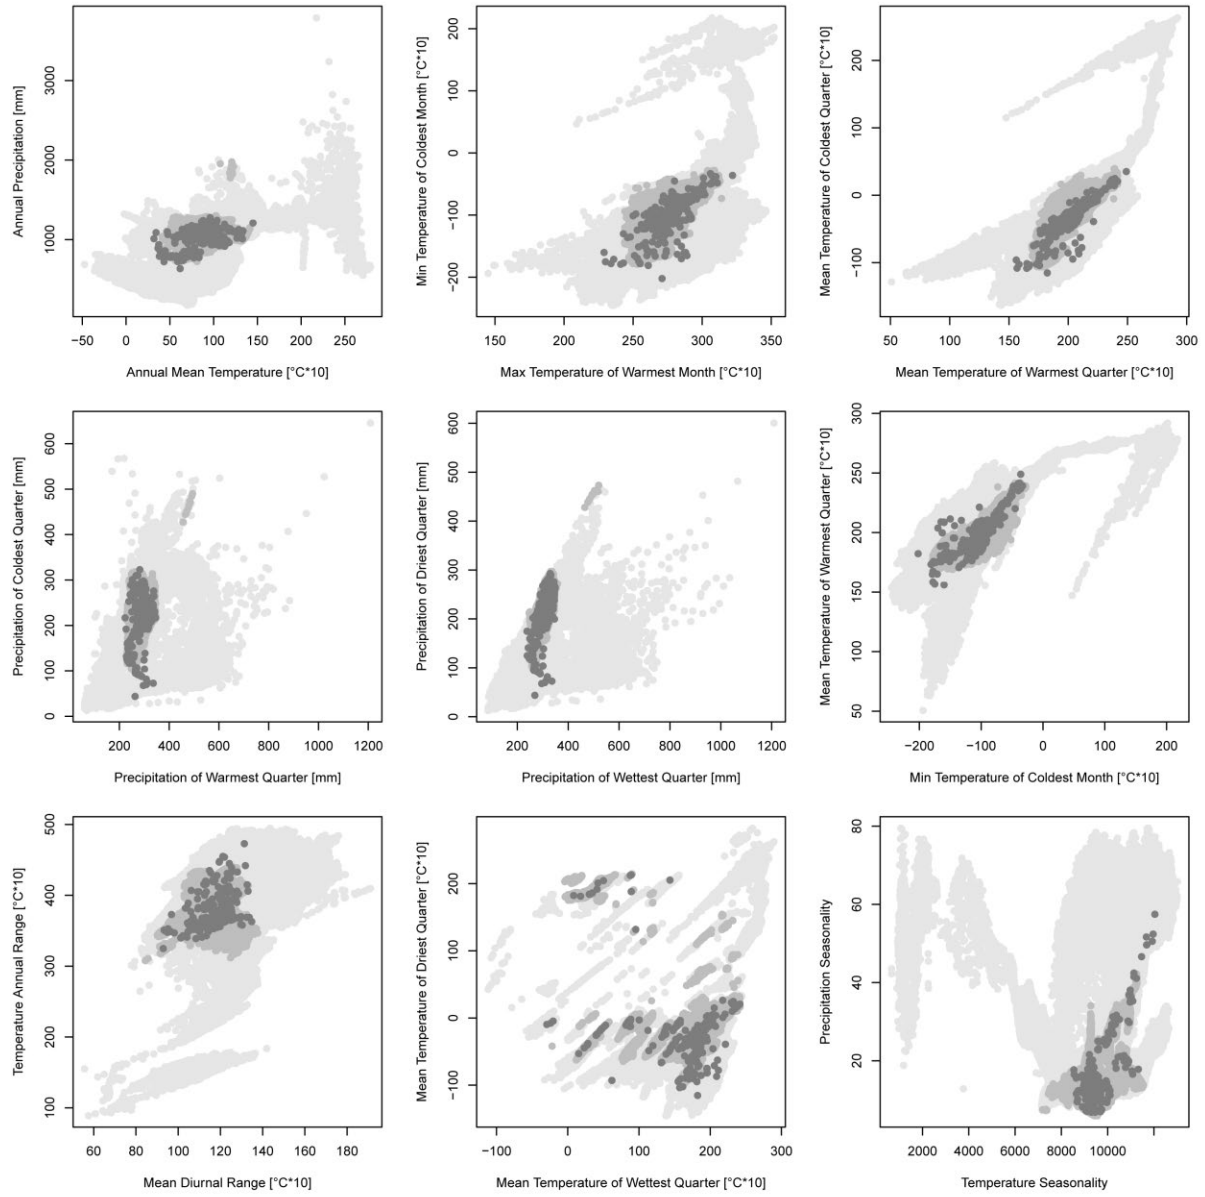

number of samples: 293

number of fossils: 0

sp12 - Glyptemys muhlenbergii

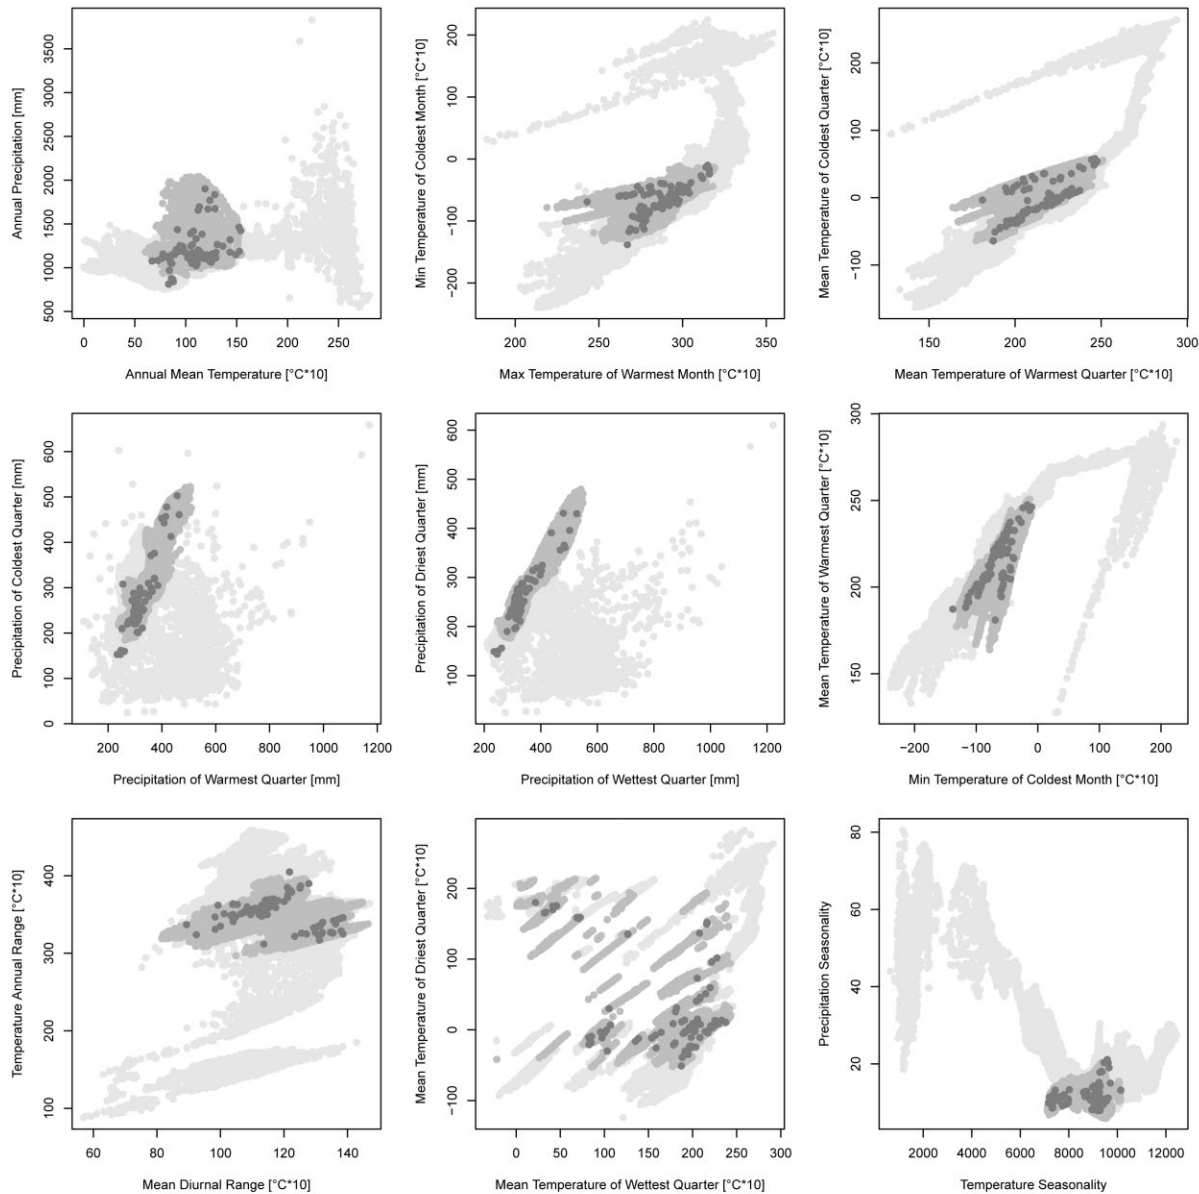

number of samples: 104  
number of fossils: 0

sp13 – Graptemys barbouri

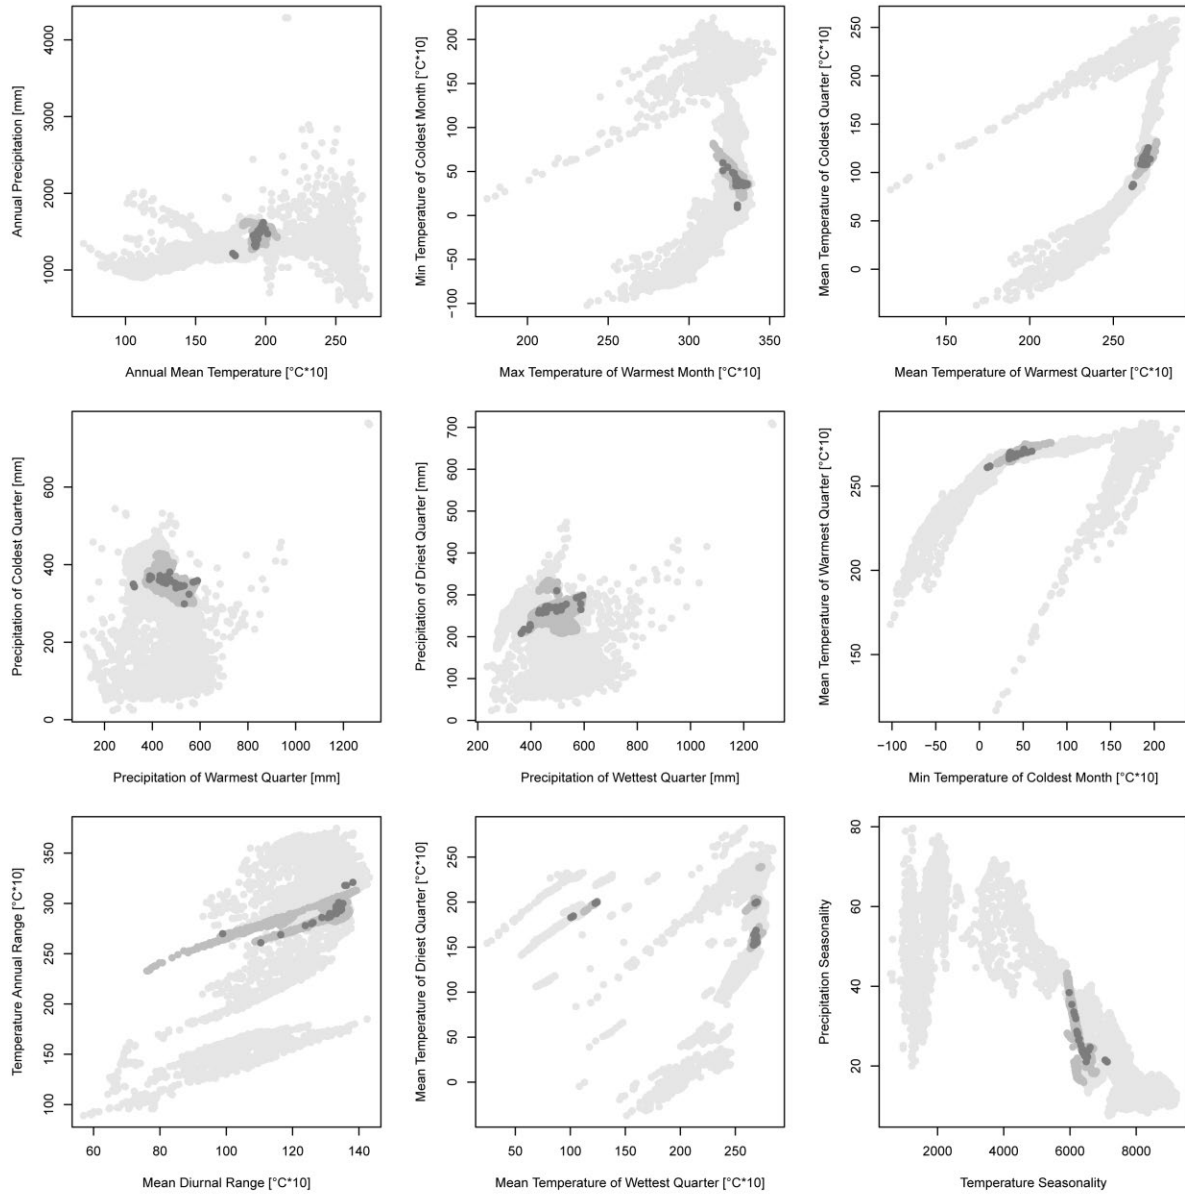

number of samples: 45

number of fossils: 0

sp14 – Graptemys caglei

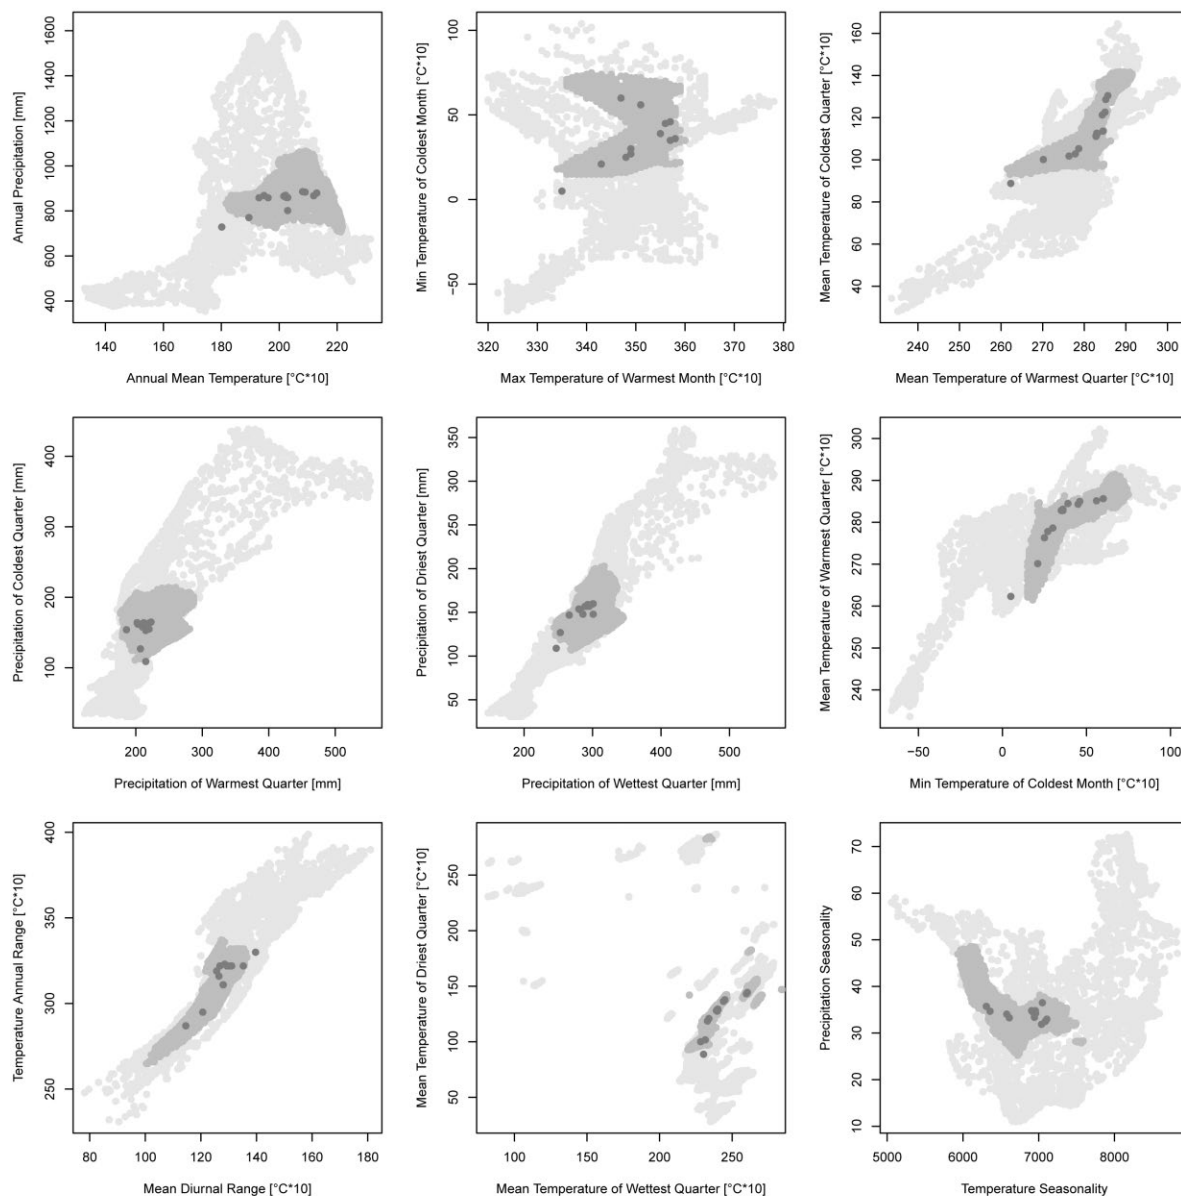

number of samples: 14

number of fossils: 0

# sp15 – Graptemys ernsti

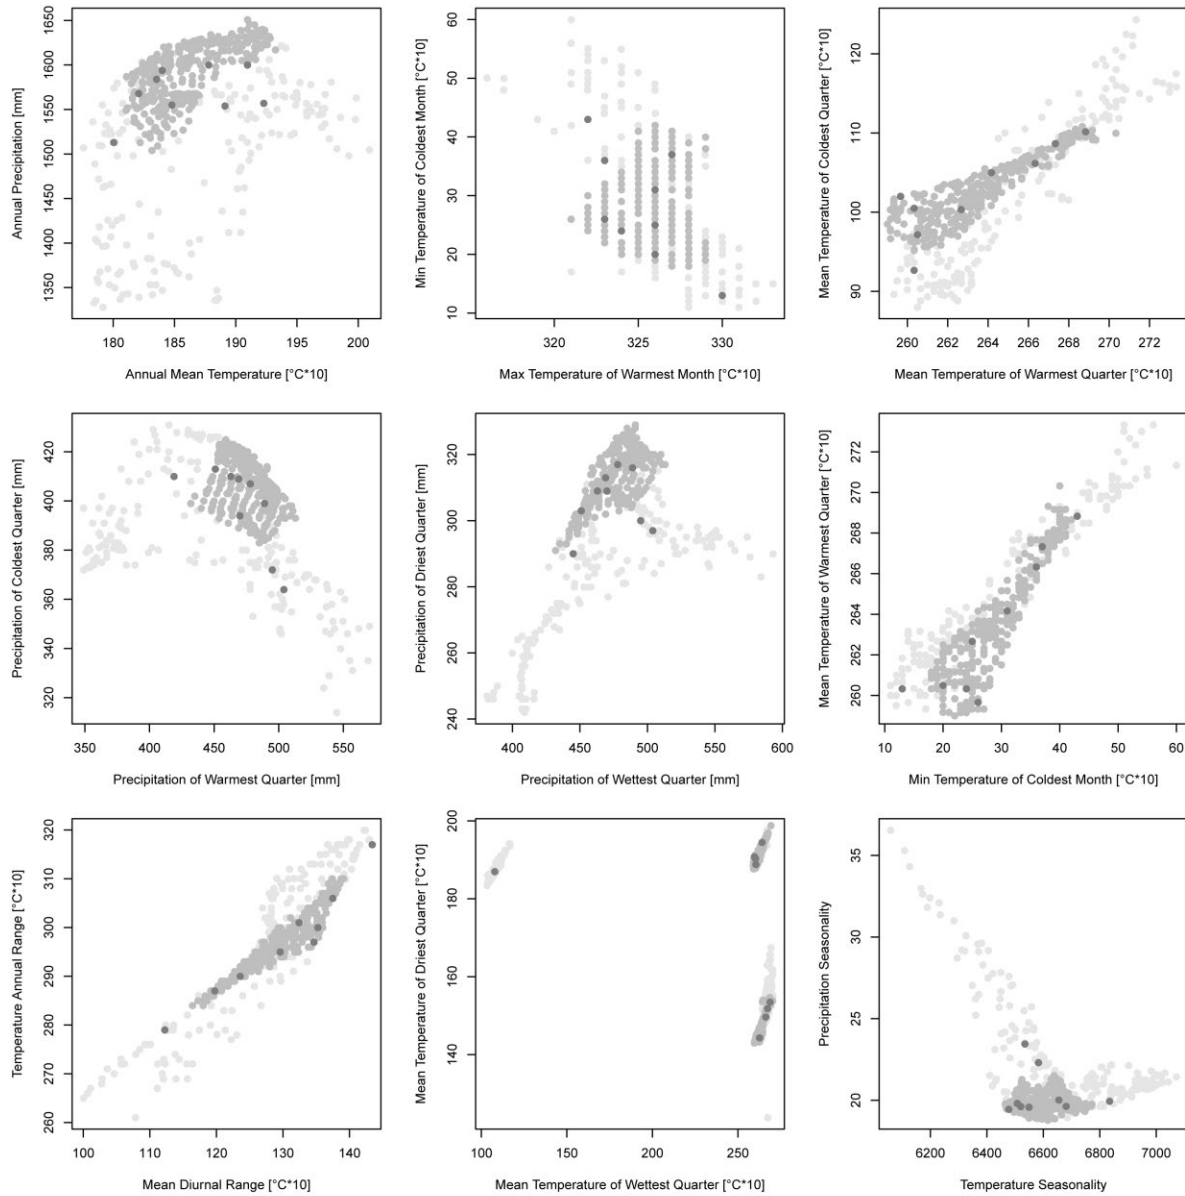

number of samples: 11

number of fossils: 0

sp16 – *Graptemys flavimaculata*

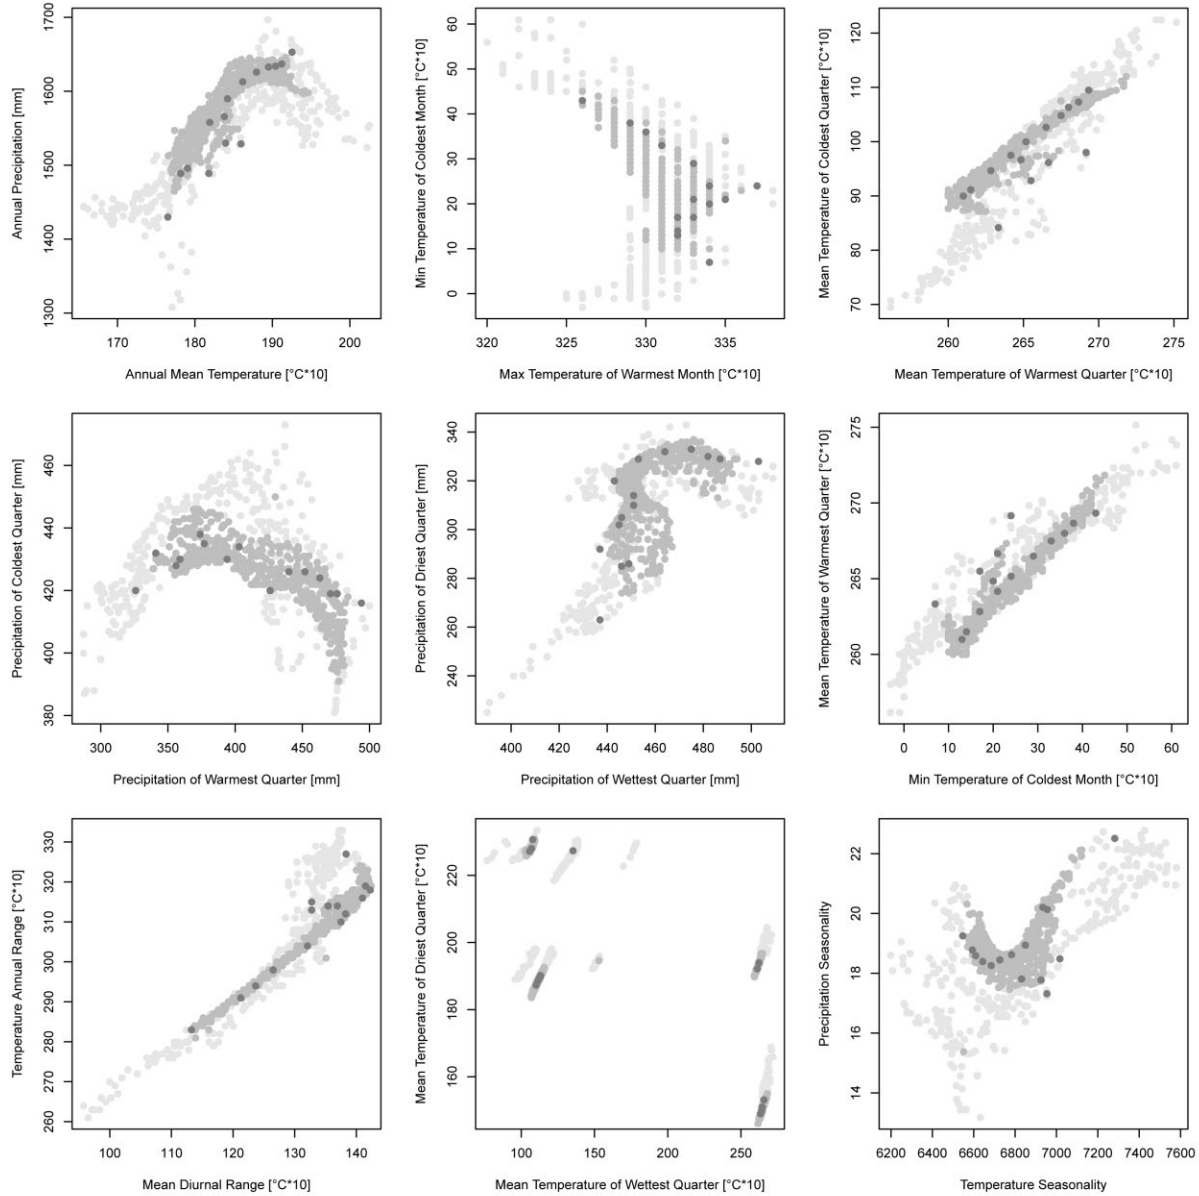

number of samples: 16

number of fossils: 0

sp17 – Graptemys geographica

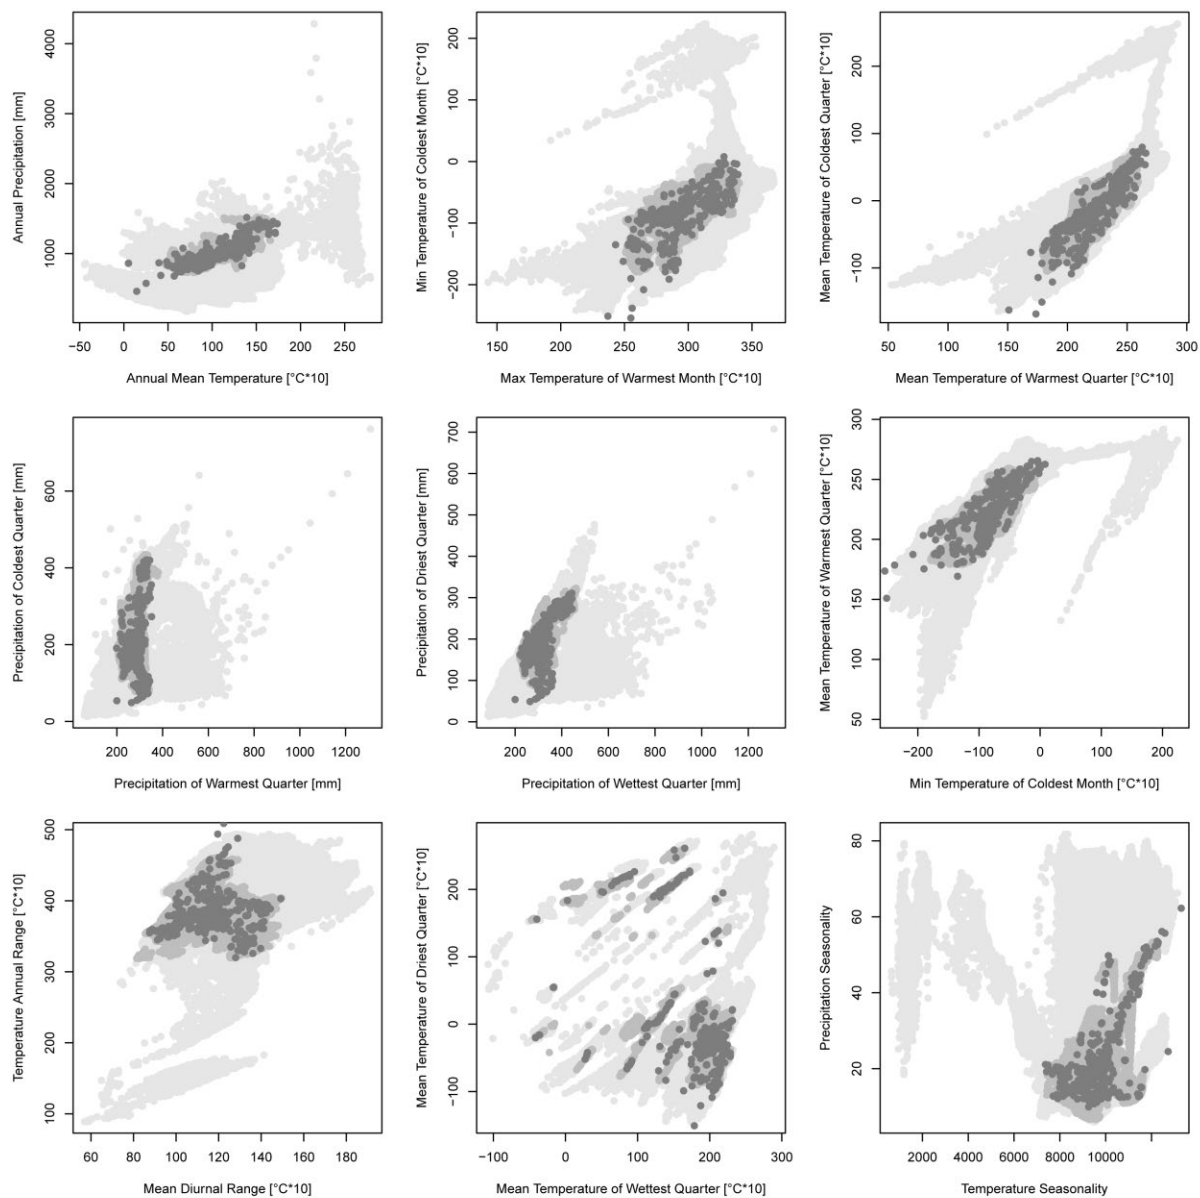

number of samples: 436

number of fossils: 0

sp18 – Graptemys gibbonsi

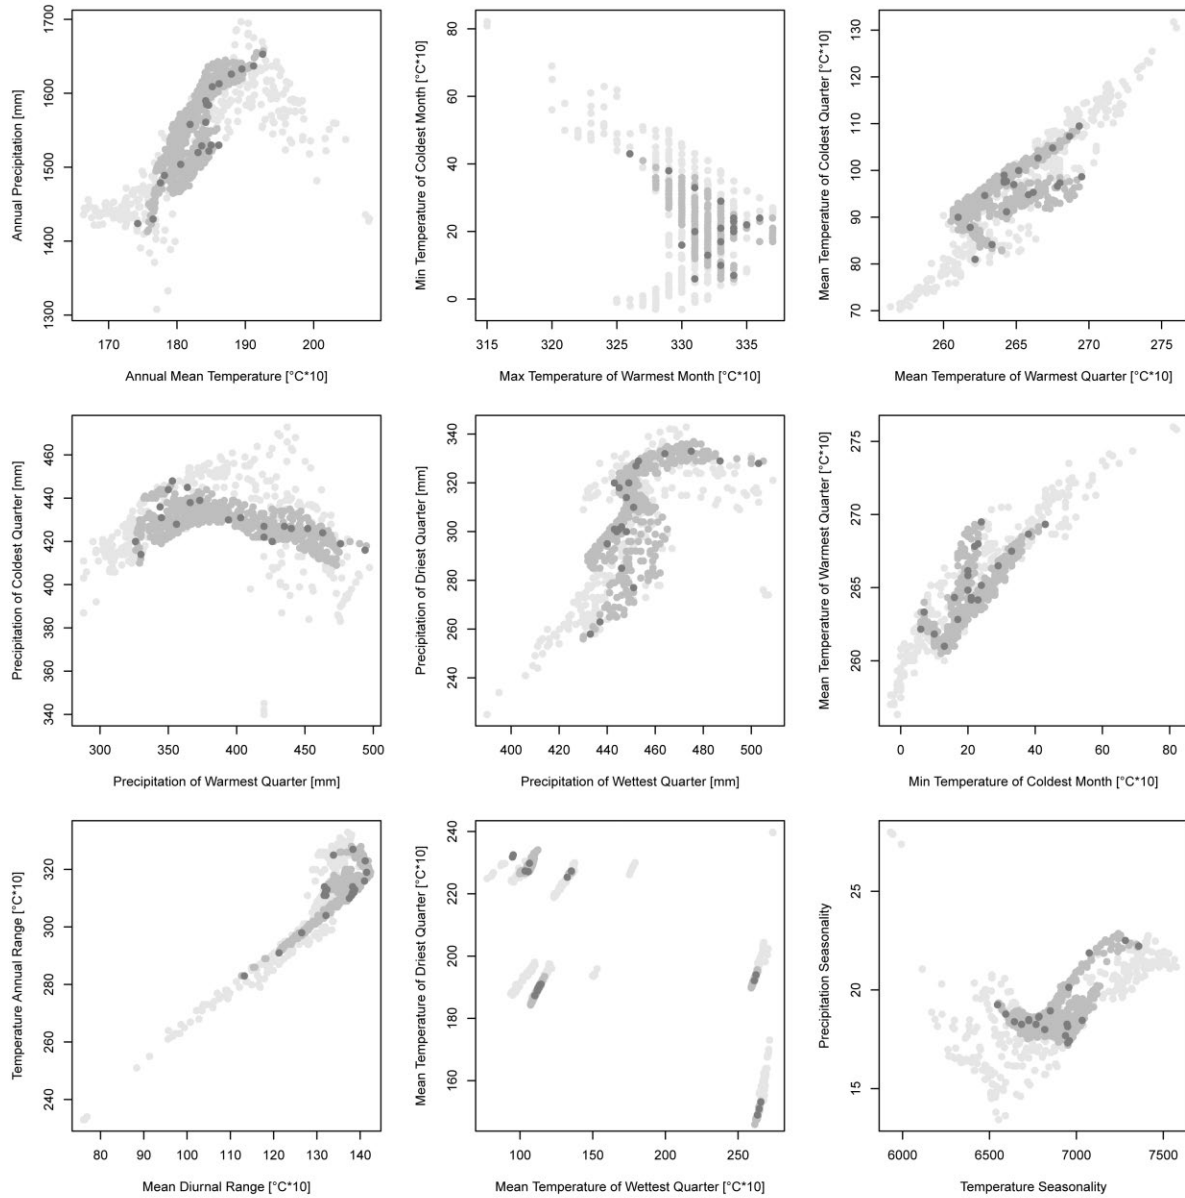

number of samples: 21

number of fossils: 0



sp19 – *Graptemys nigrinoda*

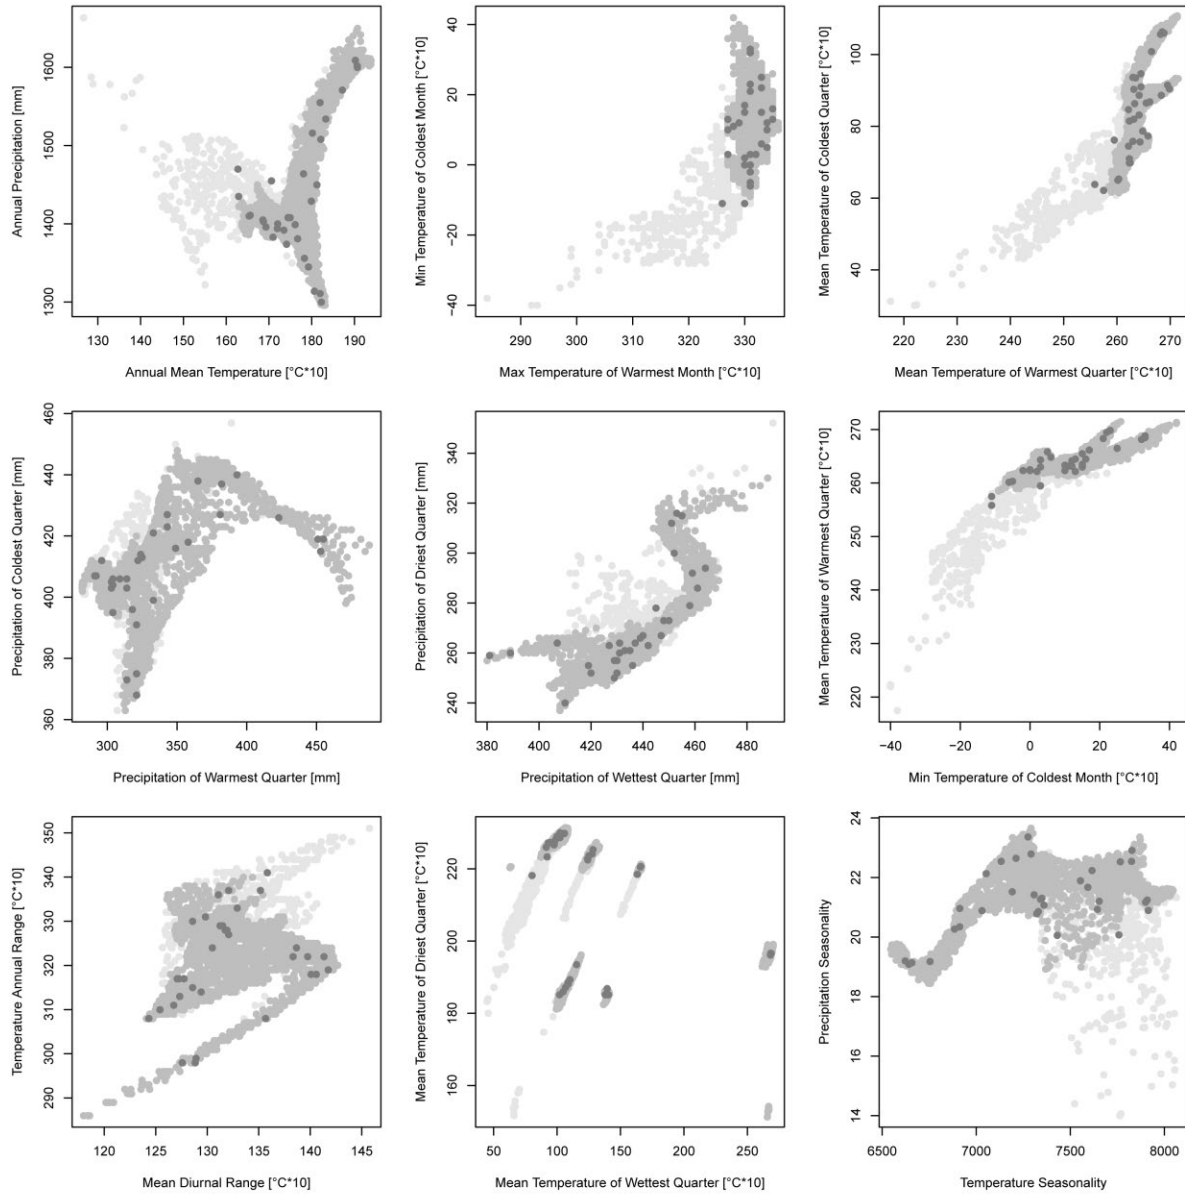

number of samples: 33

number of fossils: 0

sp20 – Graptemys oculifera

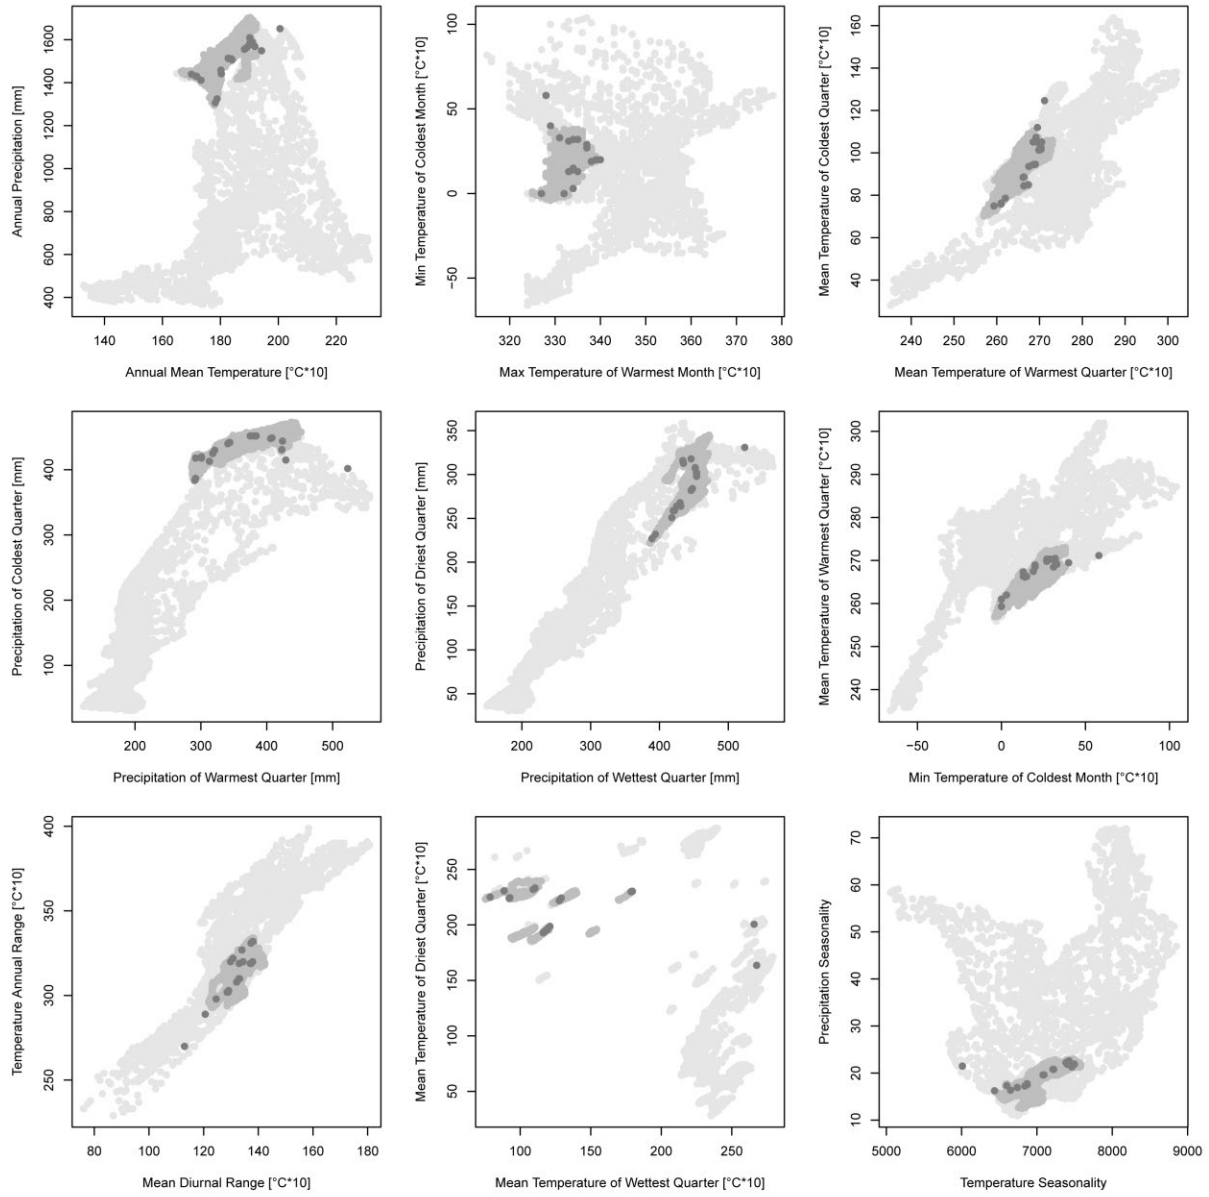

number of samples: 21

number of fossils: 0

sp21 – Graptemys ouachitensis

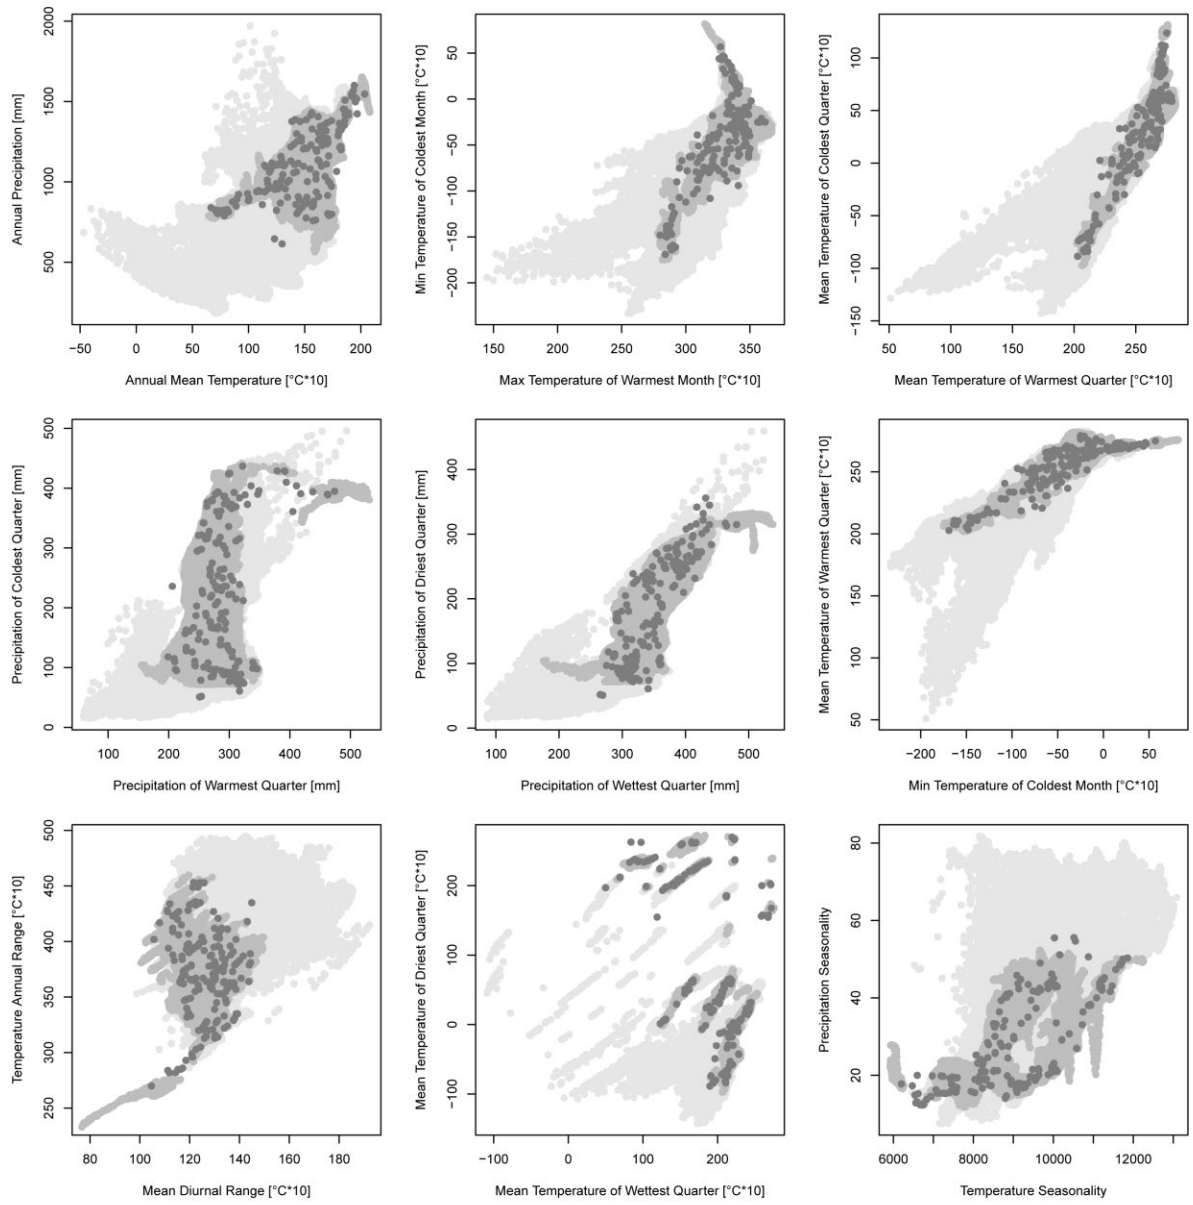

number of samples: 191  
number of fossils: 0

sp22 – *Graptemys pearlensis*

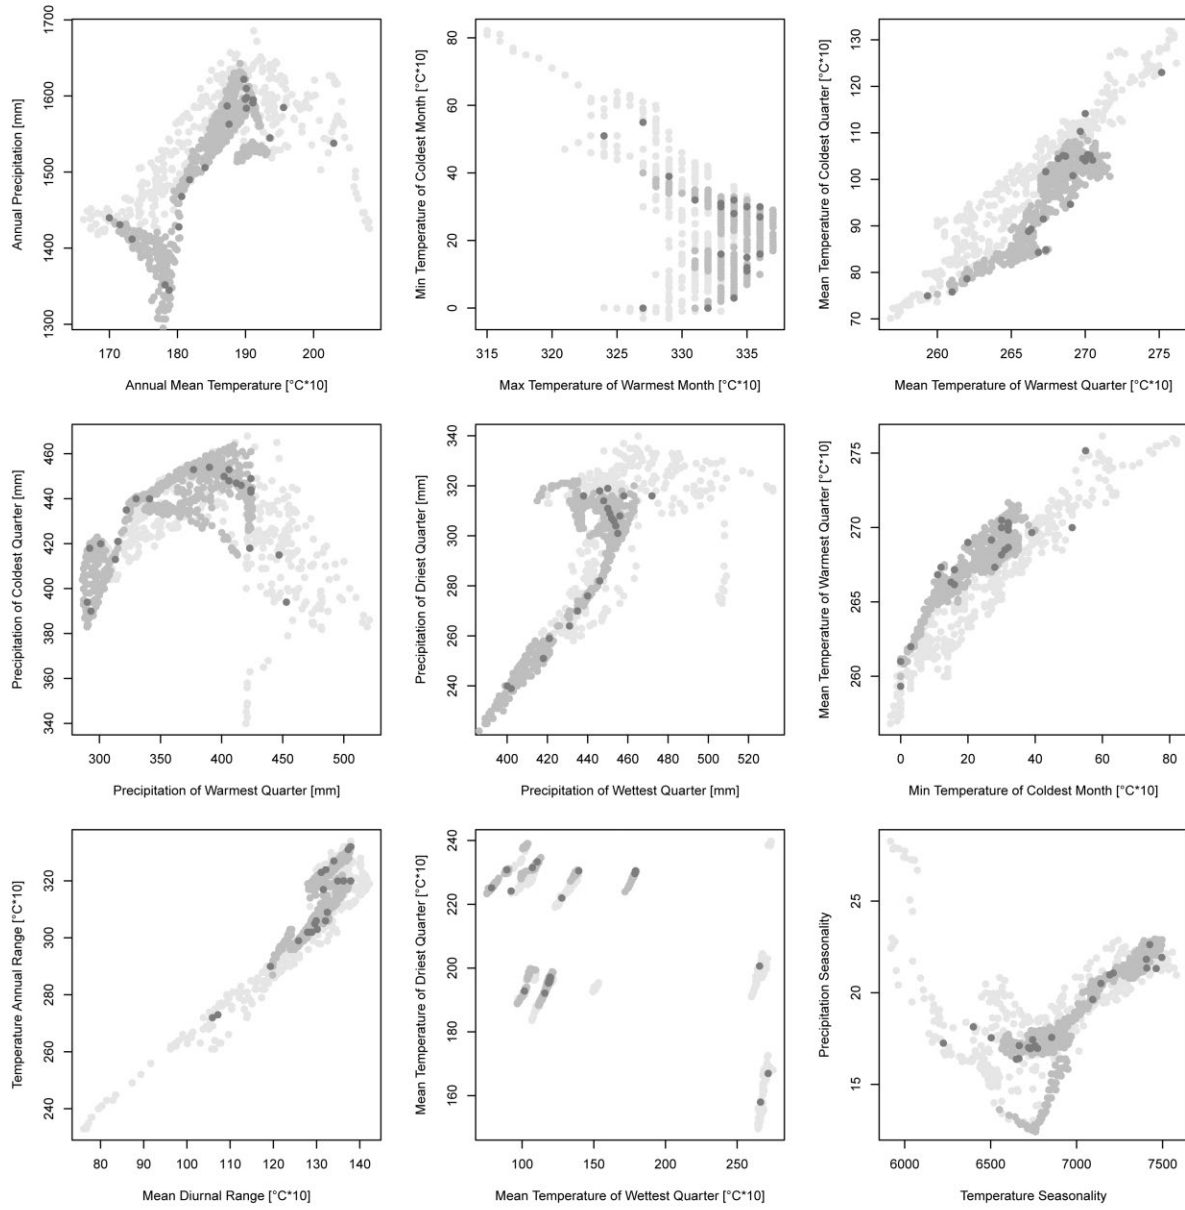

number of samples: 23

number of fossils: 0

sp23 – *Graptemys pseudogeographica*

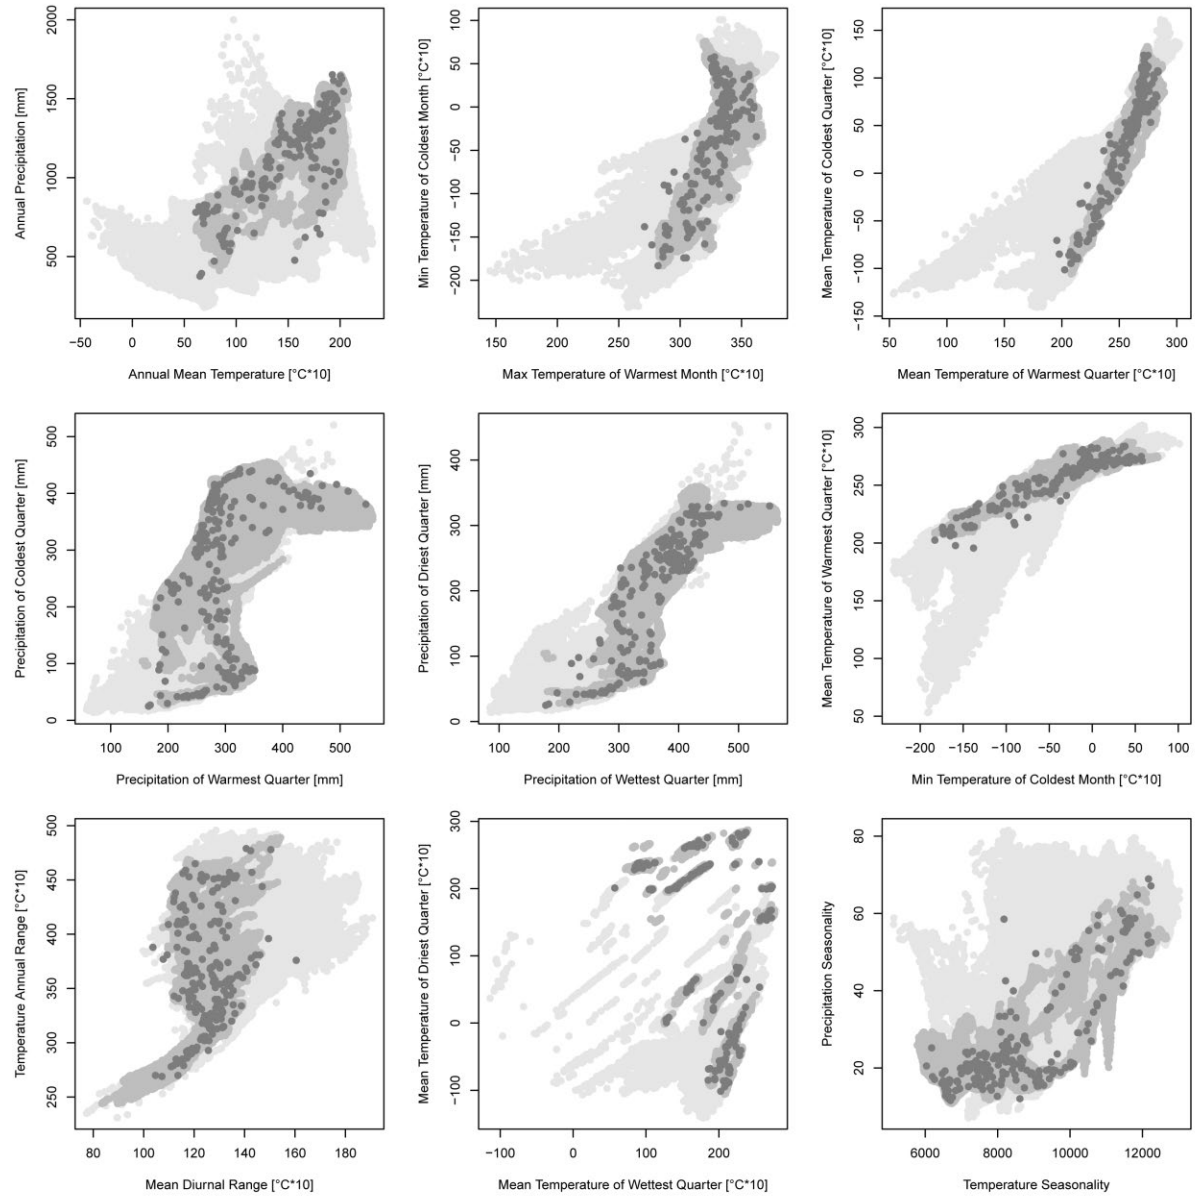

number of samples: 252

number of fossils: 0

## sp24 - Graptemys pulchra

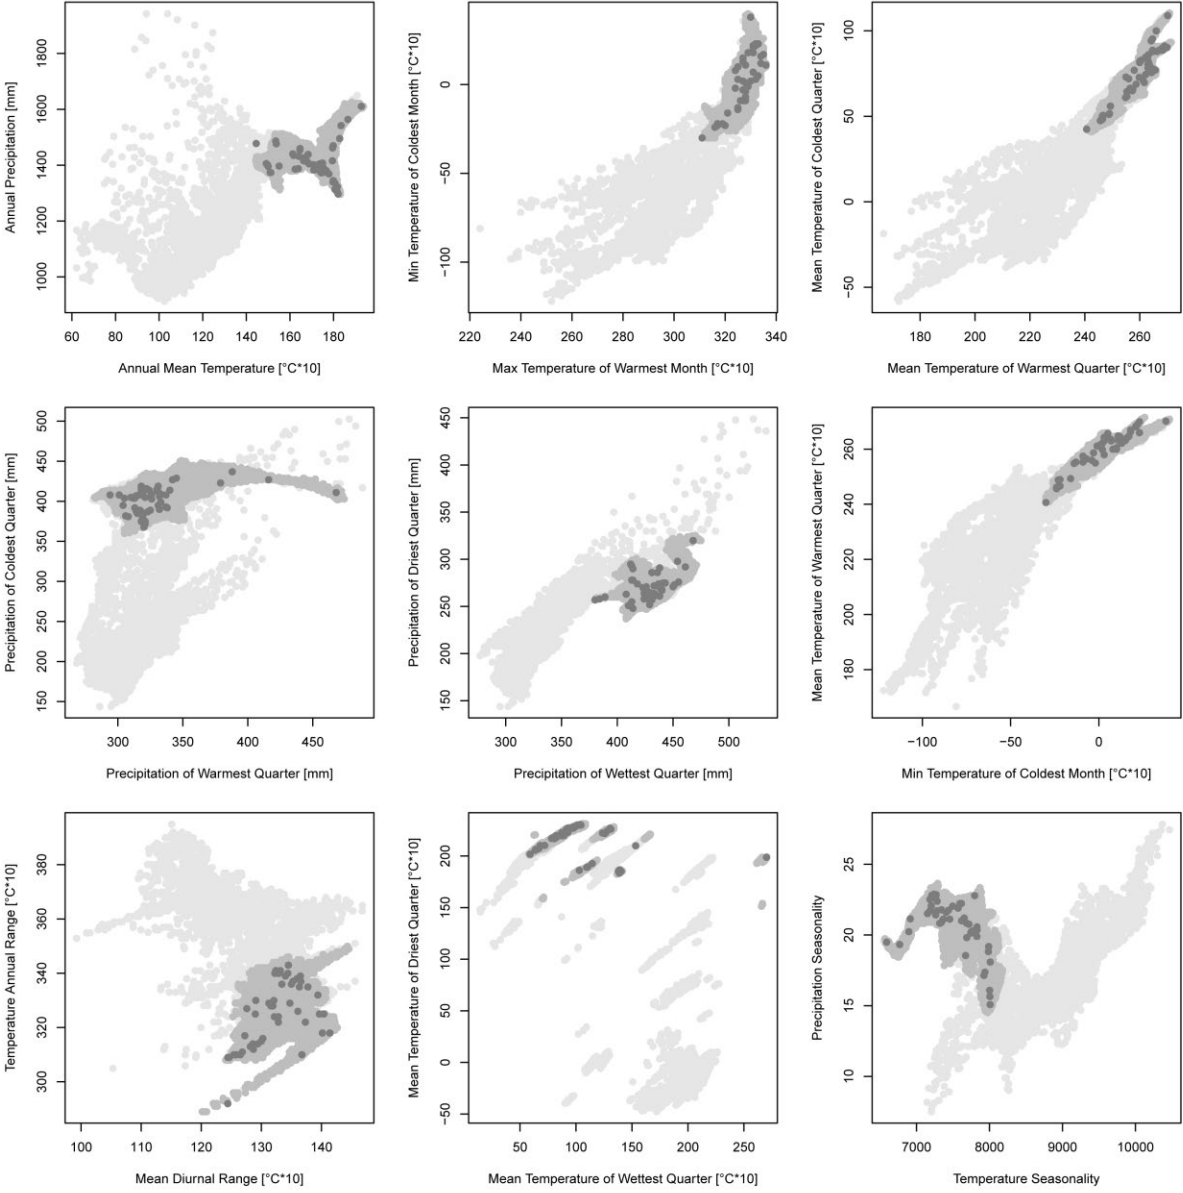

number of samples: 54

number of fossils: 0

sp25 – Graptemys versa

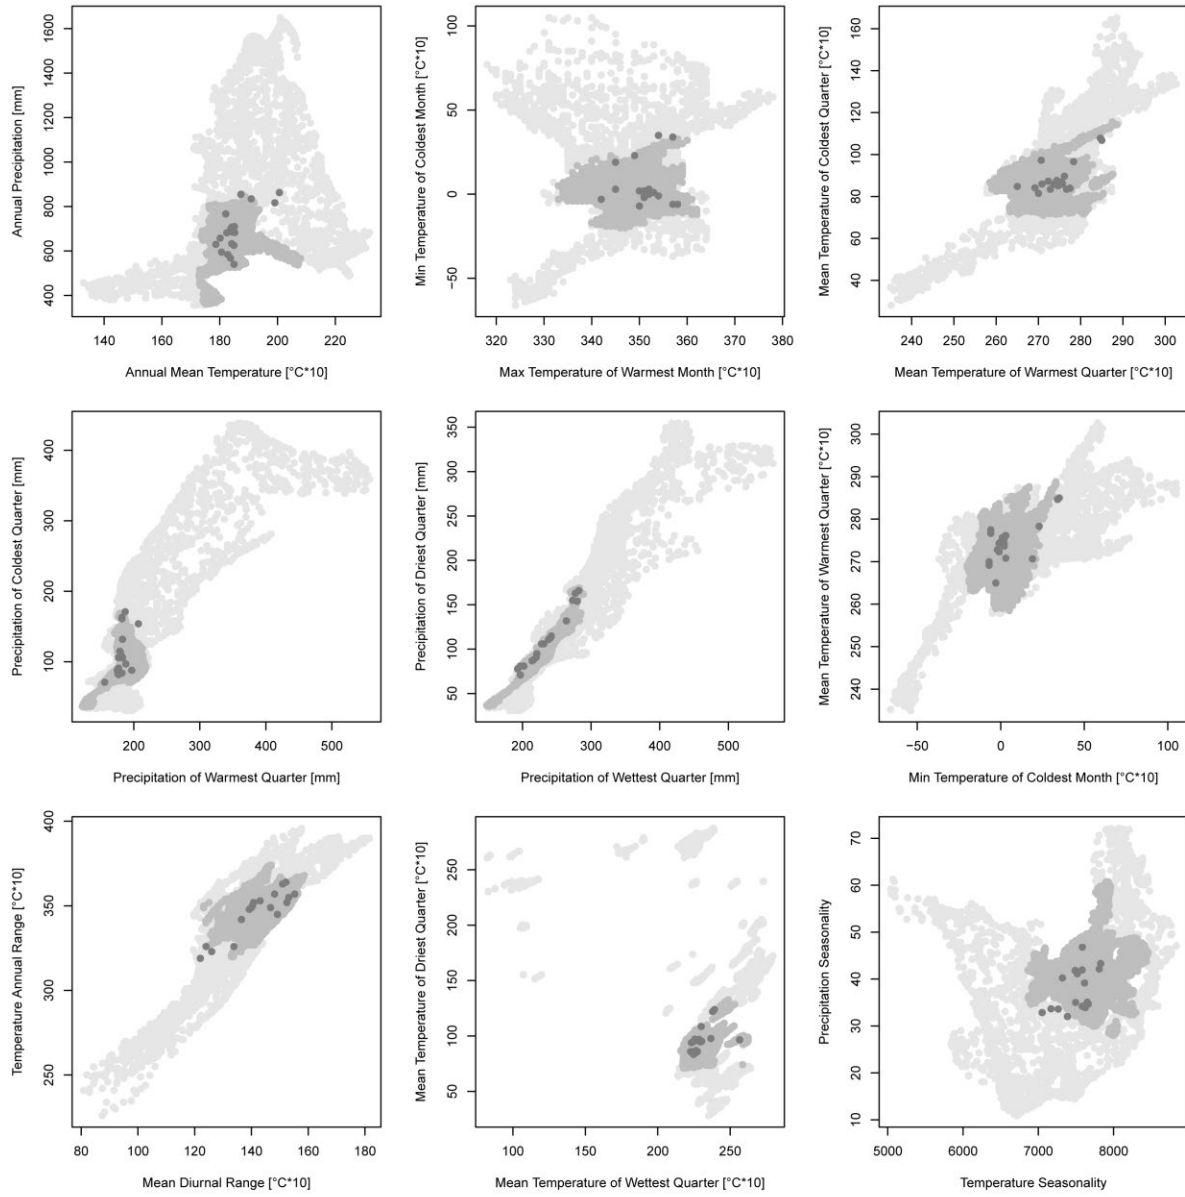

number of samples: 19

number of fossils: 0

sp26 – *Kinosternon alamosae*

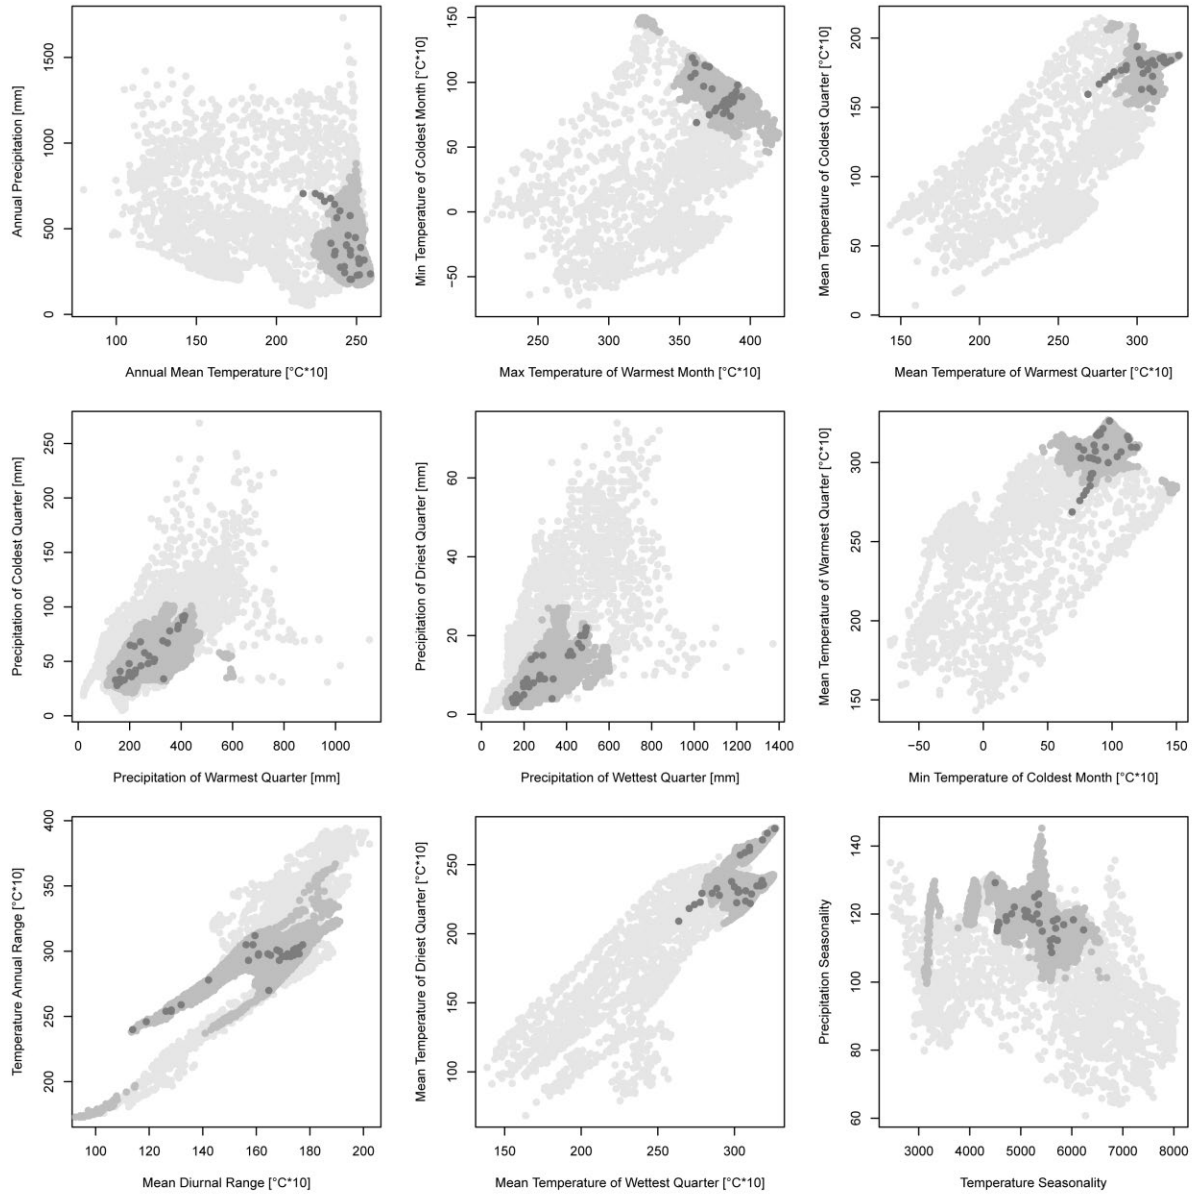

number of samples: 37

number of fossils: 0



sp27 – Kinosternon arizonense

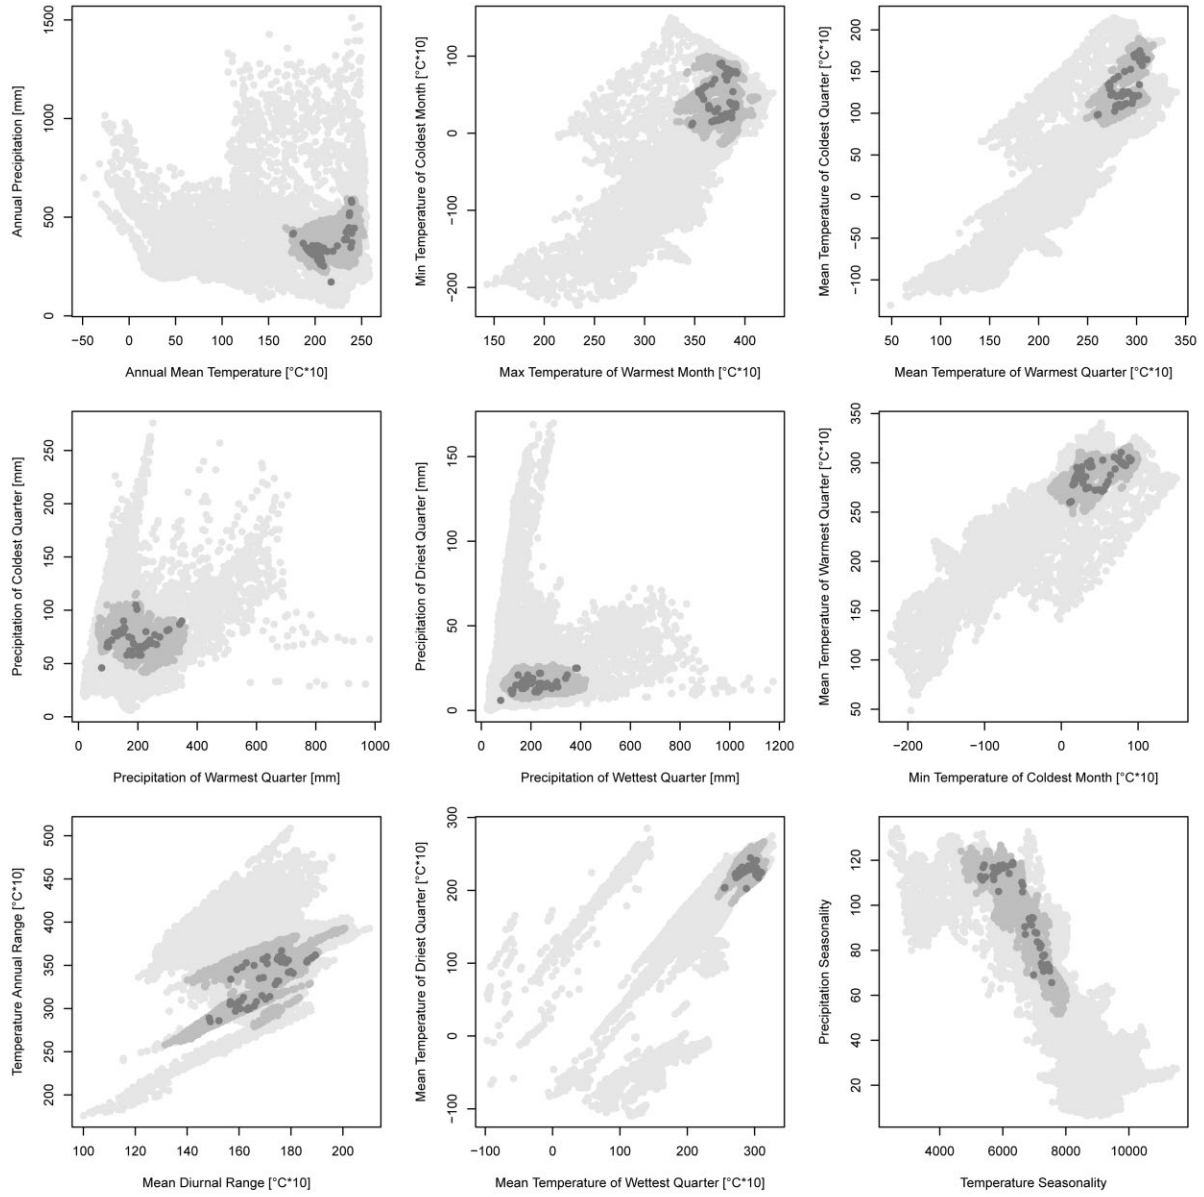

number of samples: 64

number of fossils: 0

sp28 – *Kinosternon baurii*

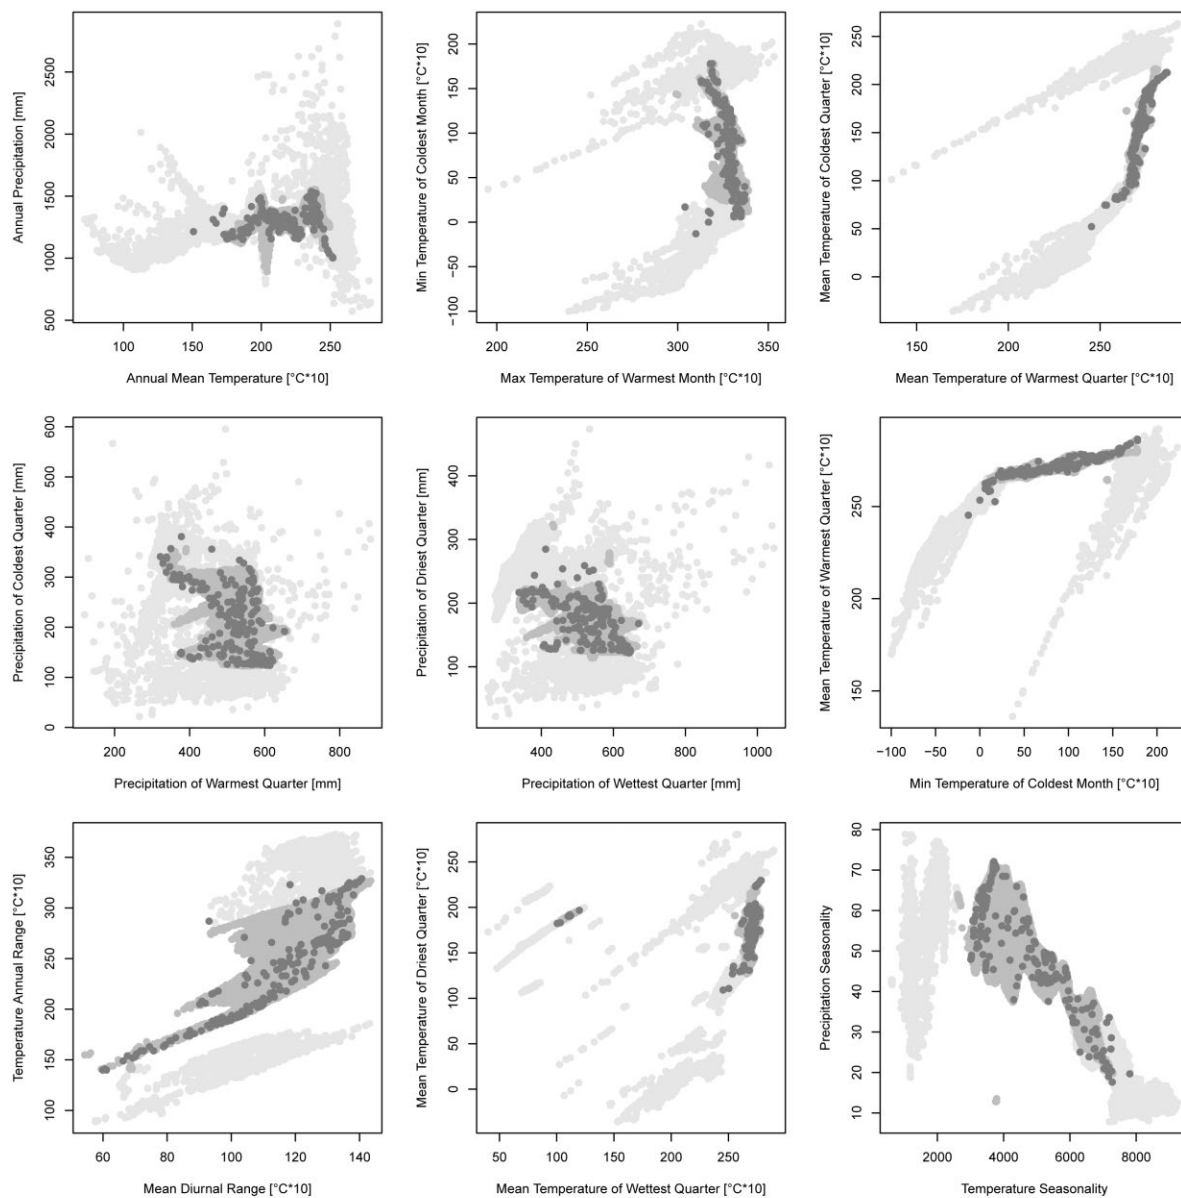

number of samples: 239

number of fossils: 0

sp29 – *Kinosternon durangoense*

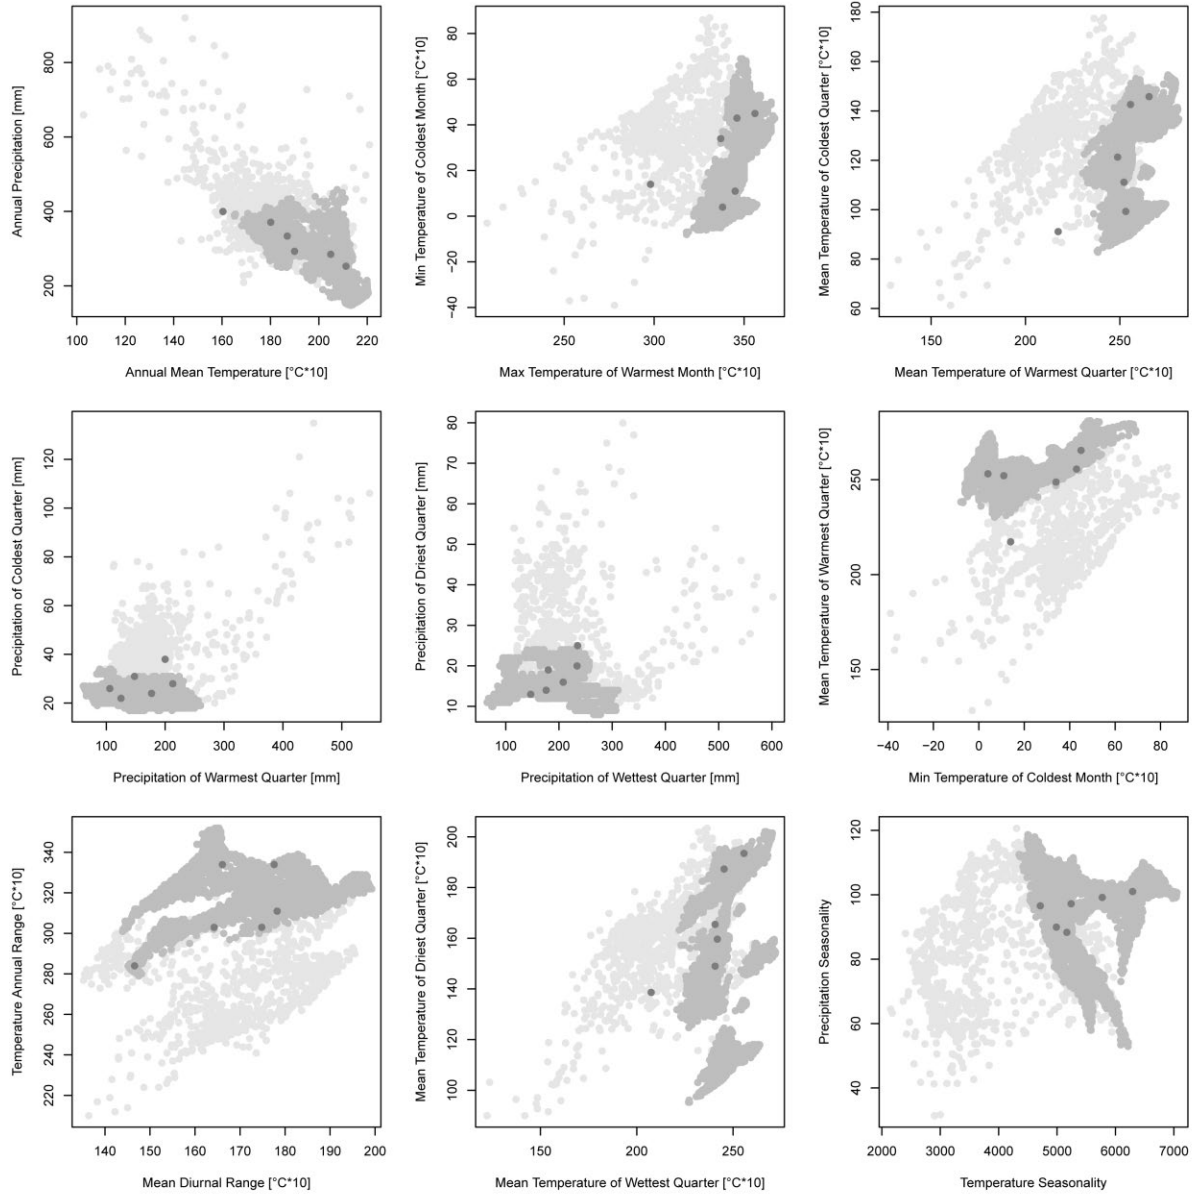

number of samples: 6

number of fossils: 0

sp30 – *Kinosternon flavescens*

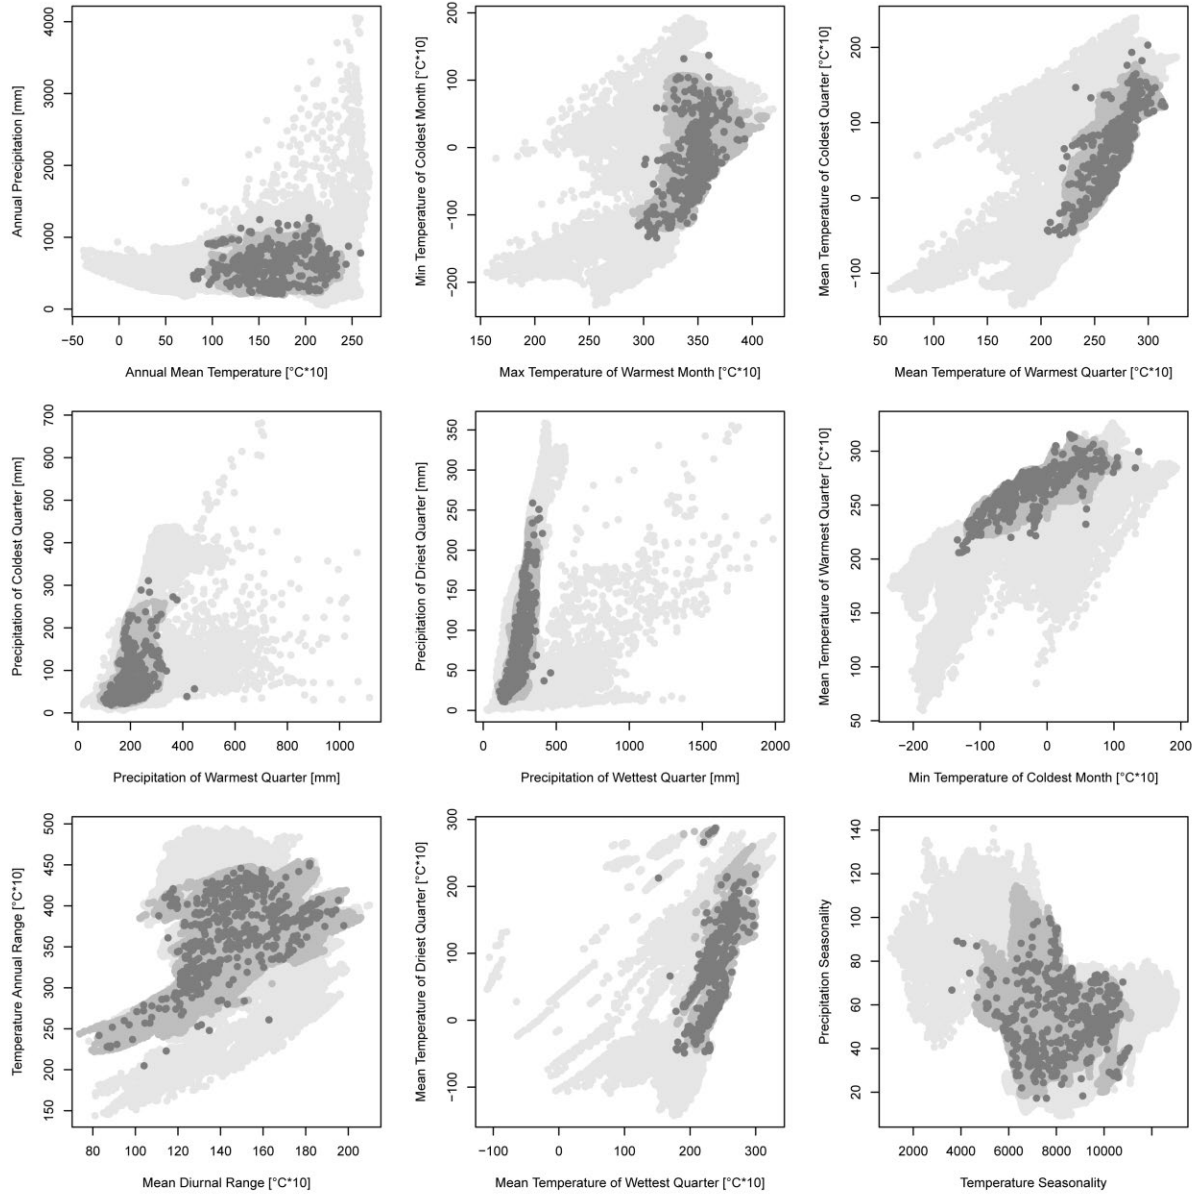

number of samples: 667

number of fossils: 0

sp31 – Kinosternon herrerae

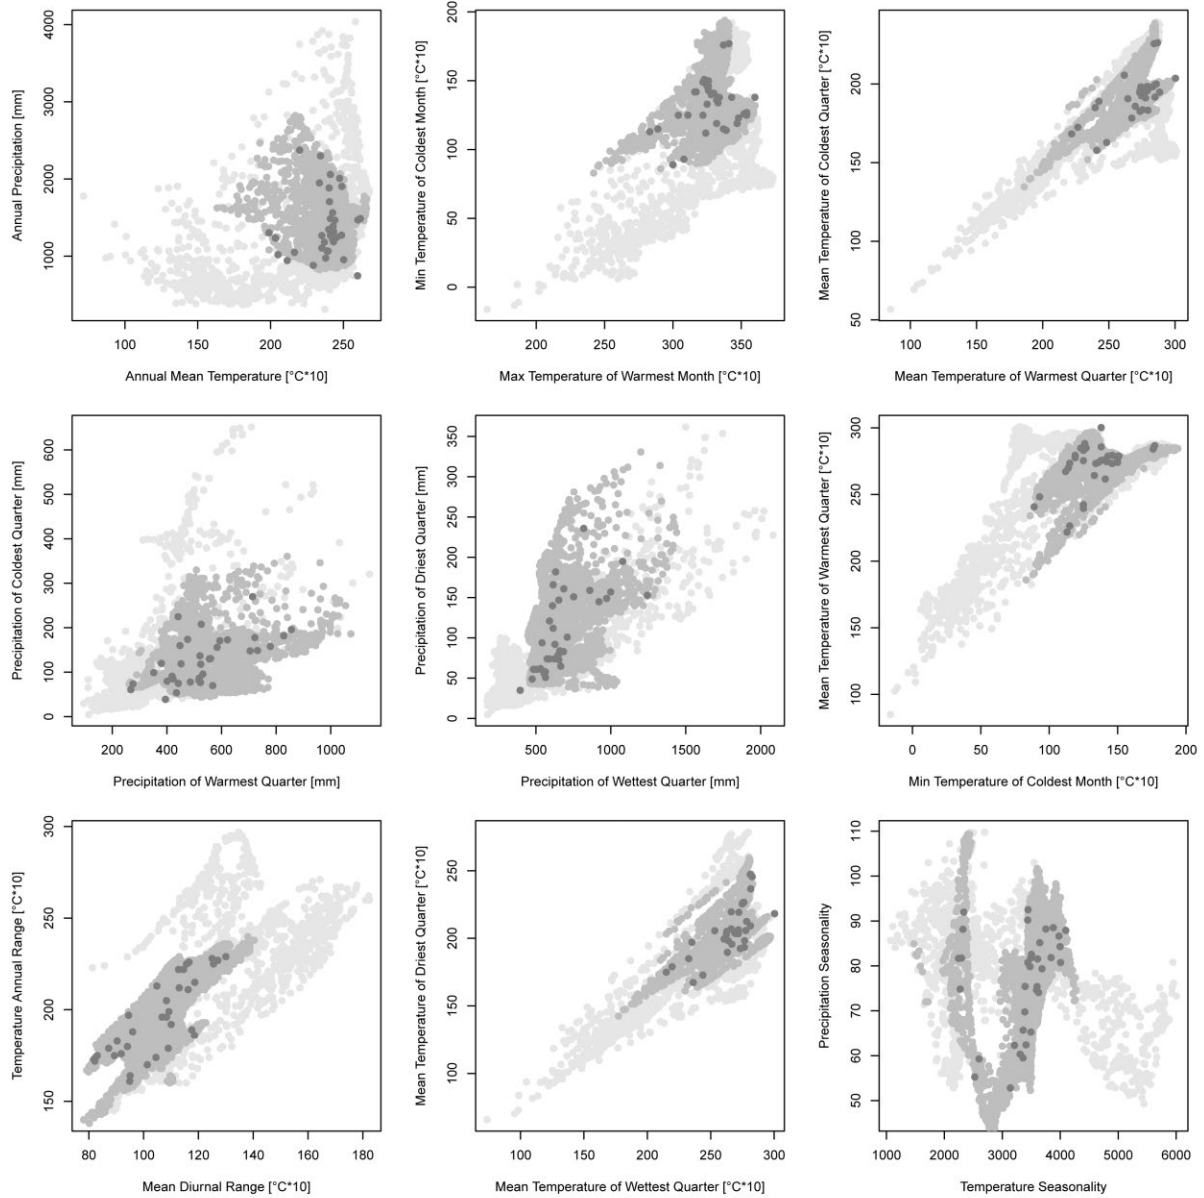

number of samples: 36

number of fossils: 0

sp32 – *Kinosternon hirtipes*

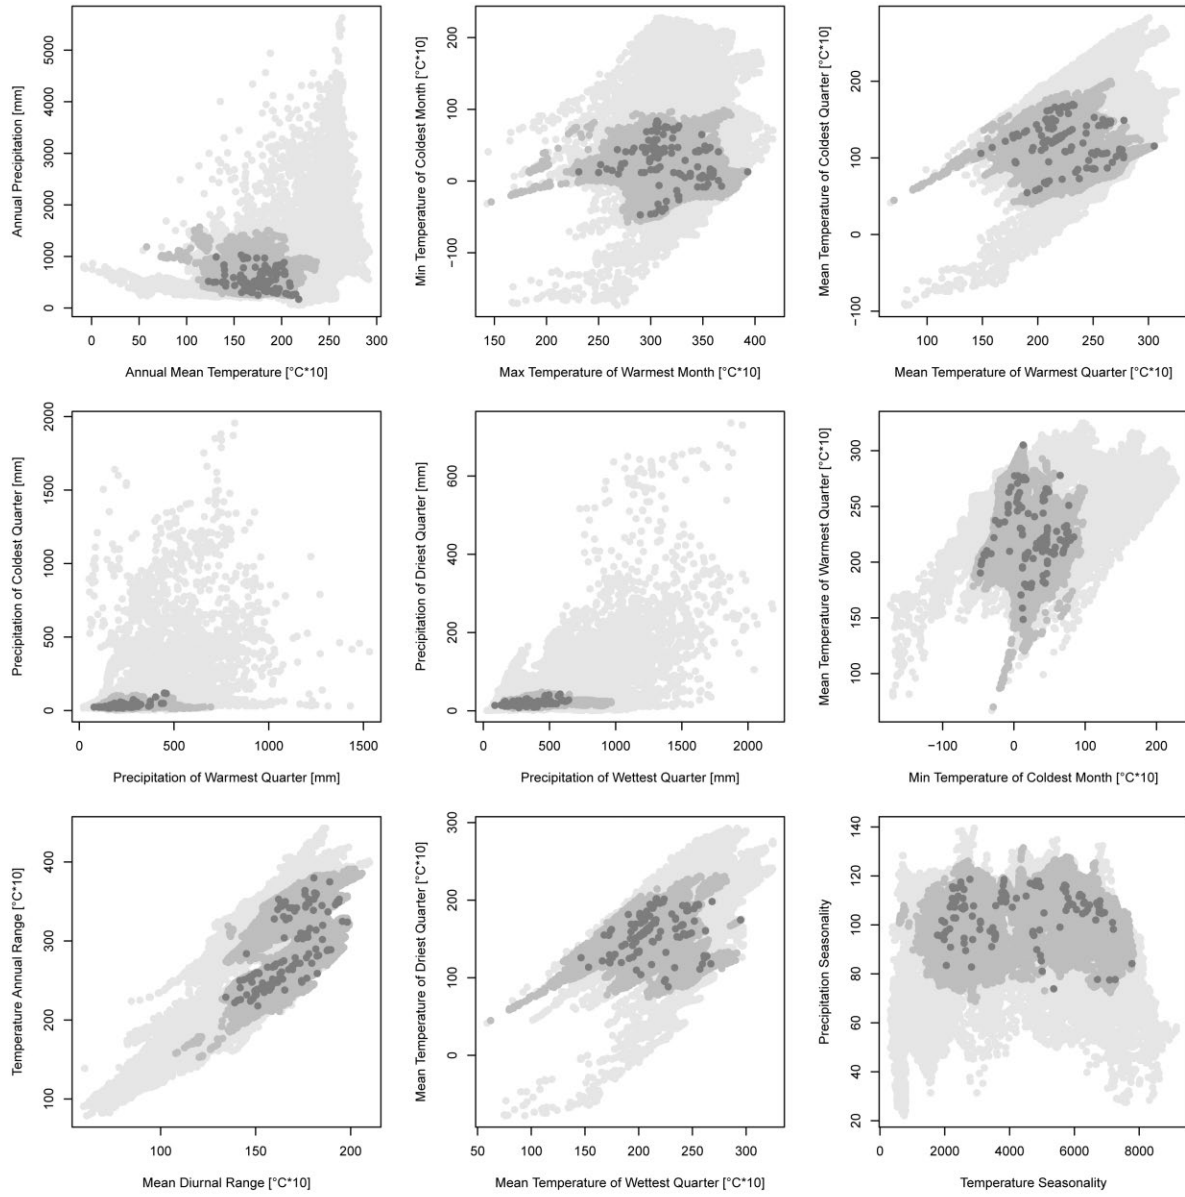

number of samples: 134

number of fossils: 0

sp33 – Kinosternon integrum

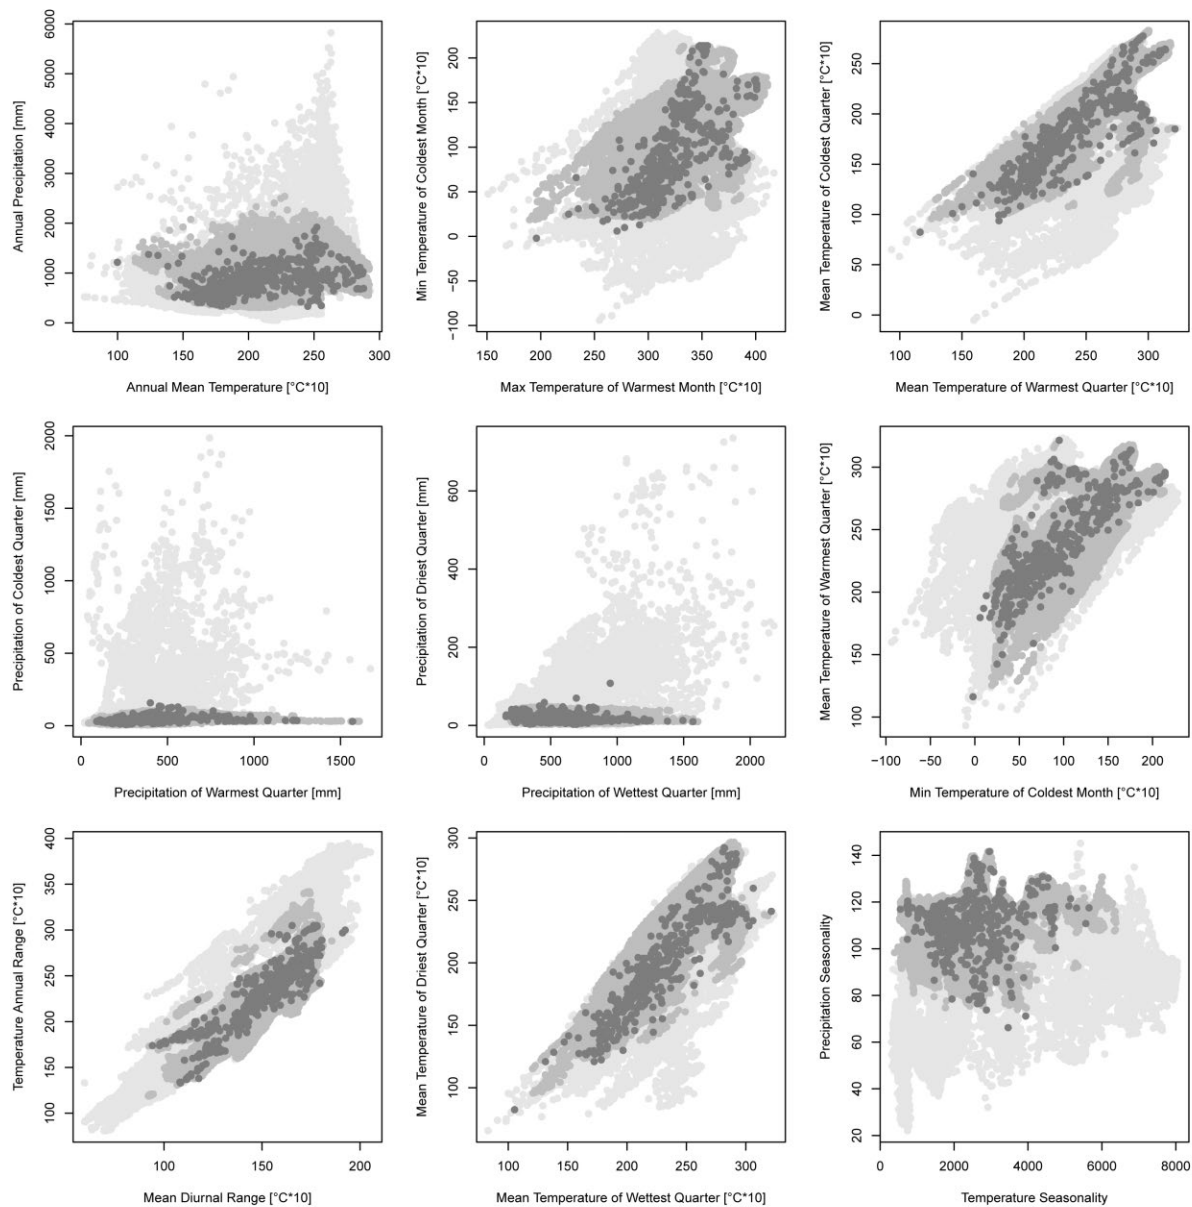

number of samples: 545

number of fossils: 0

sp34 – *Kinosternon sonoriense*

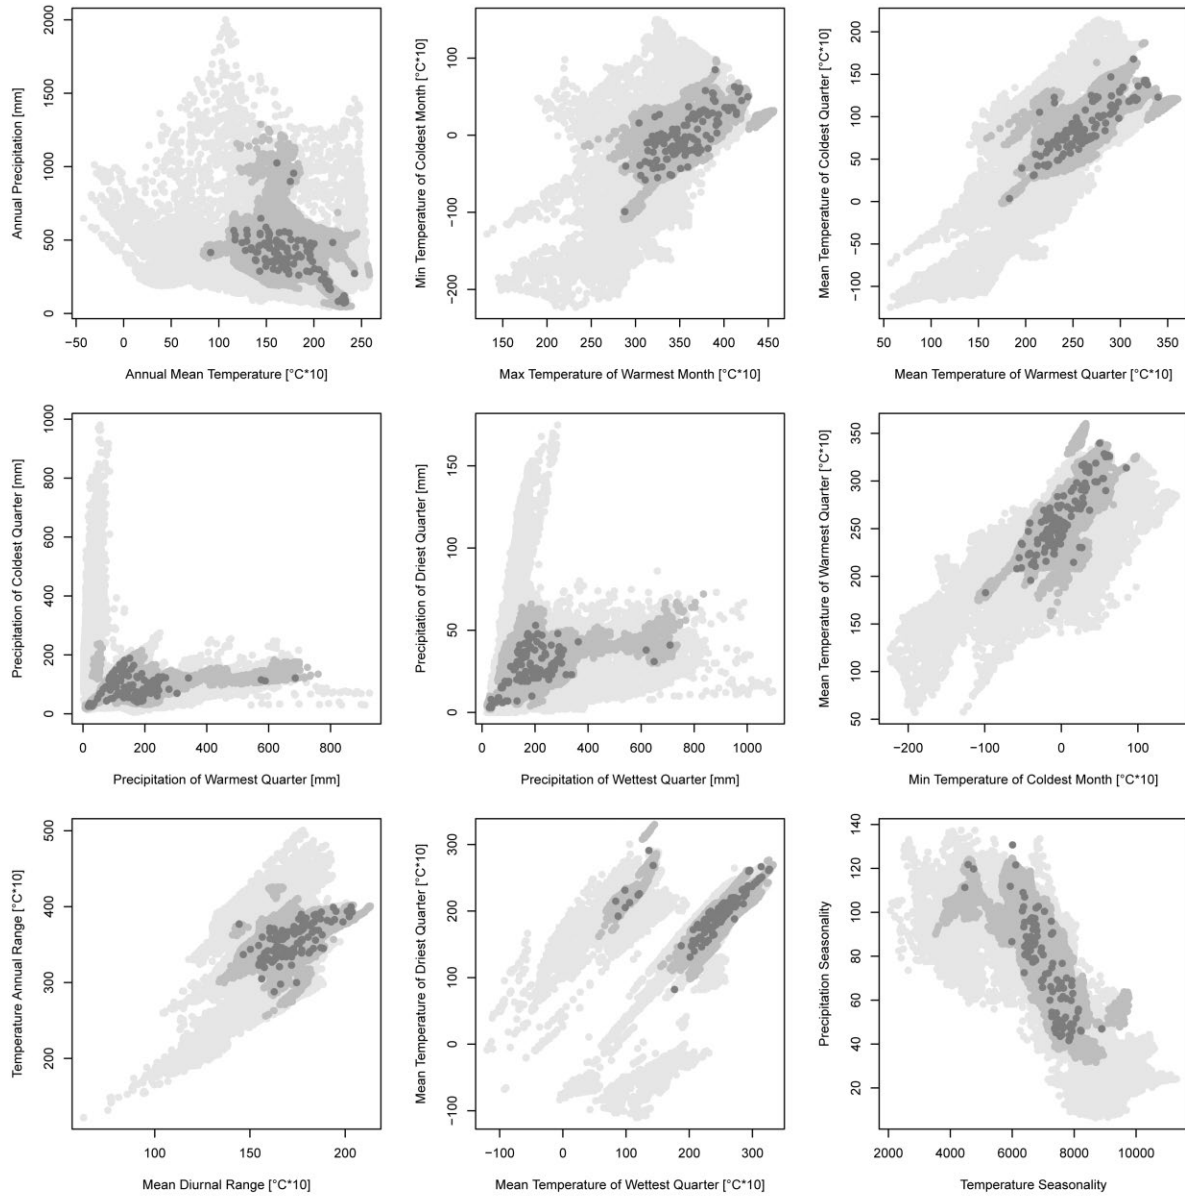

number of samples: 132

number of fossils: 0



sp35 – *Kinosternon subrubrum*

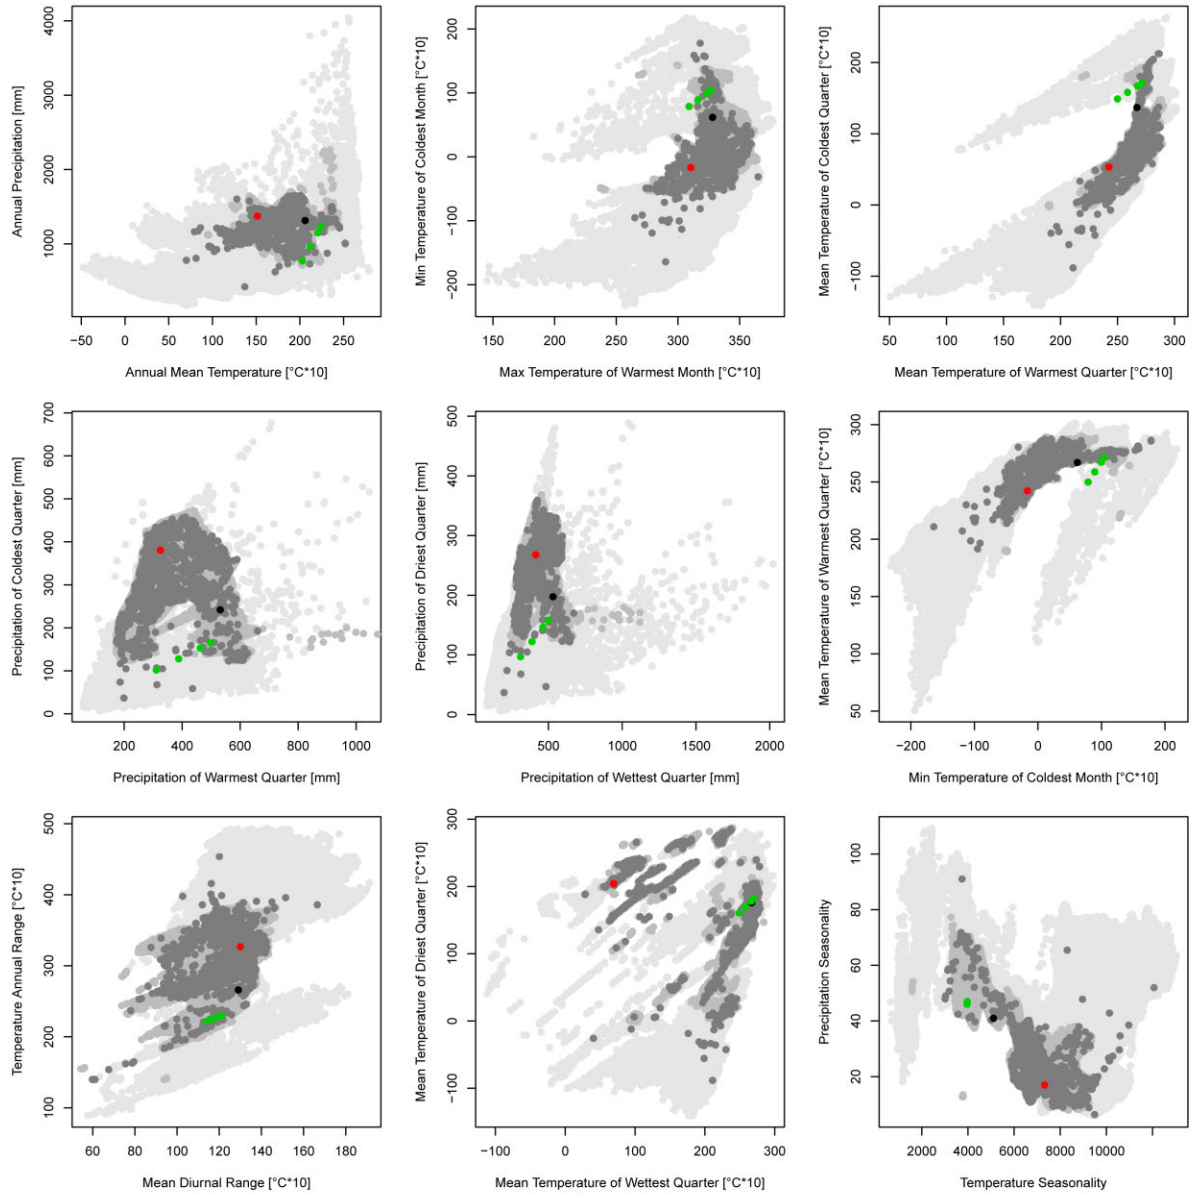

number of samples: 1581

number of fossils: 3

sp36 – *Macrochelys temminckii*

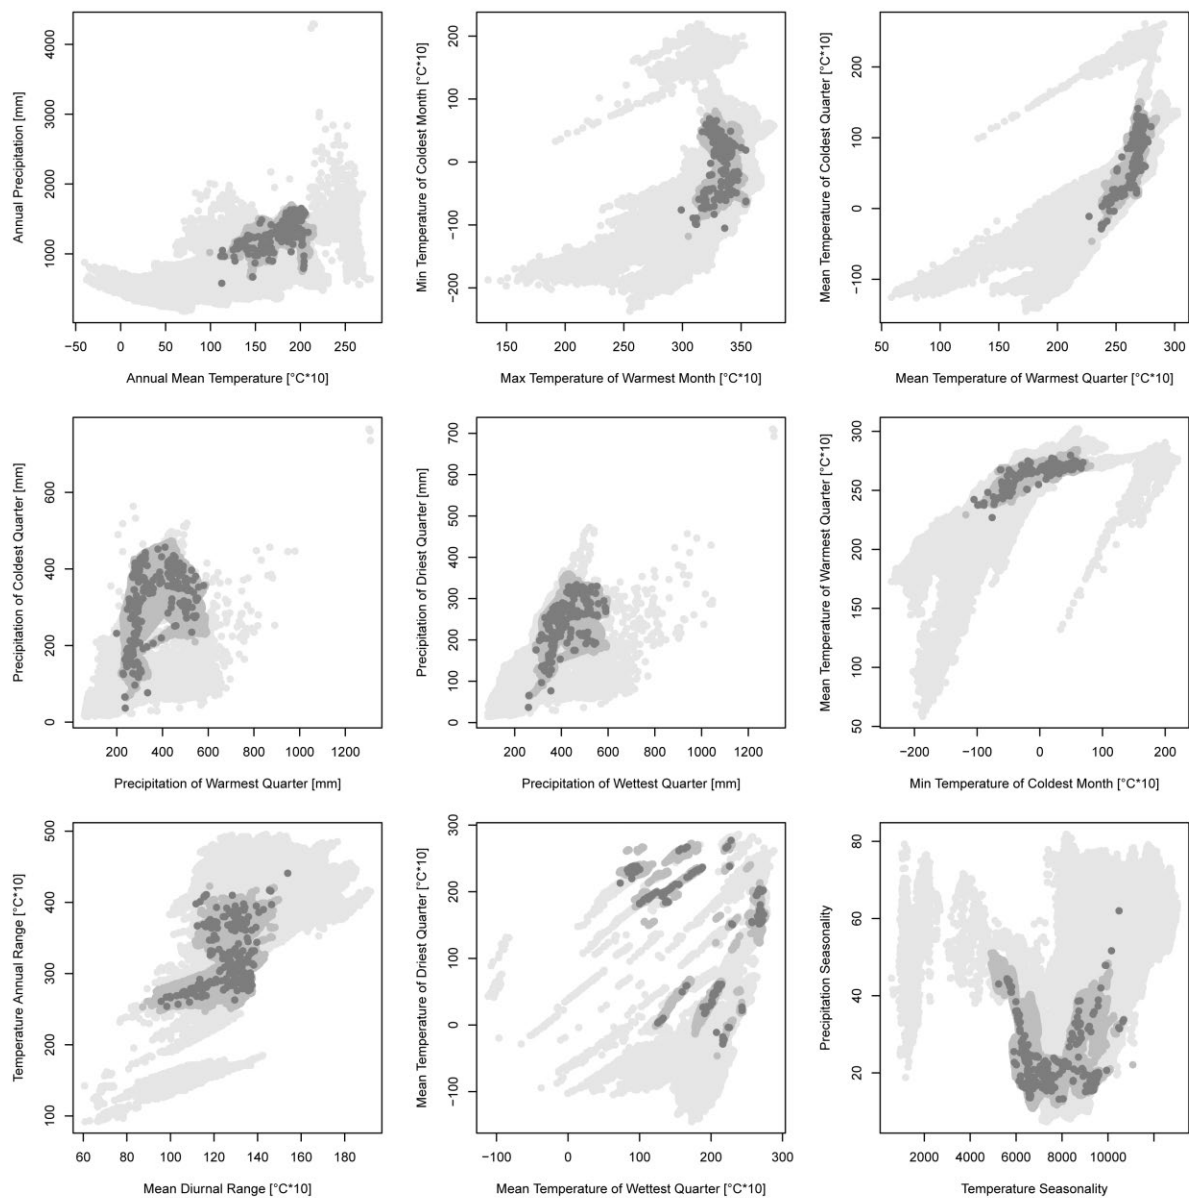

number of samples: 271

number of fossils: 0

sp37 – Malaclemys terrapin

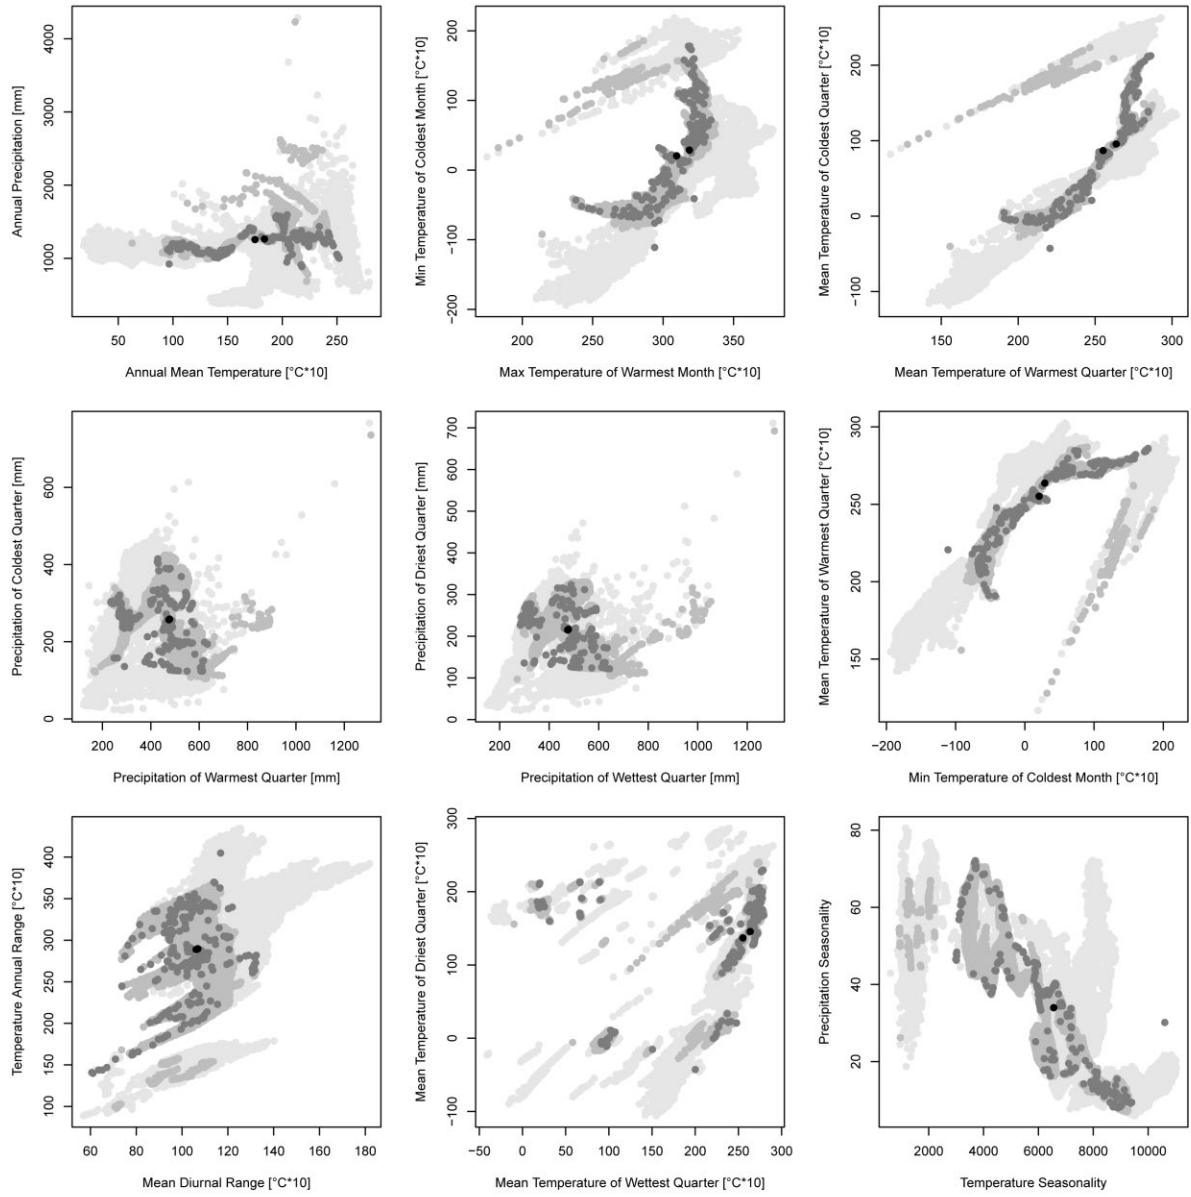

number of samples: 240

number of fossils: 1

sp38 – *Pseudemys alabamensis*

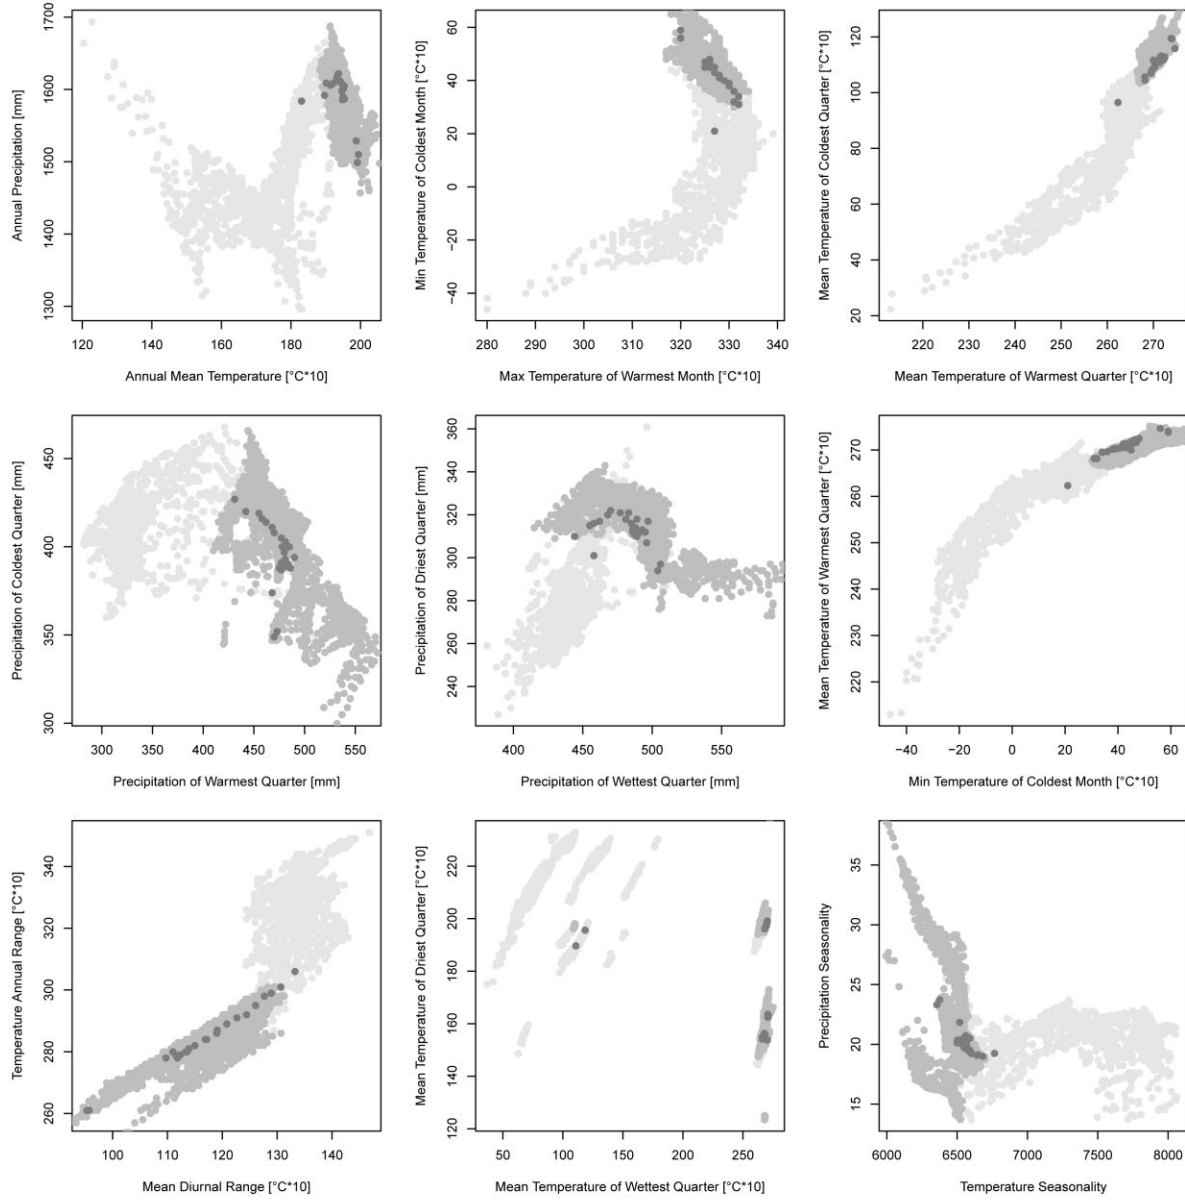

number of samples: 34

number of fossils: 0

sp39 – *Pseudemys concinna*

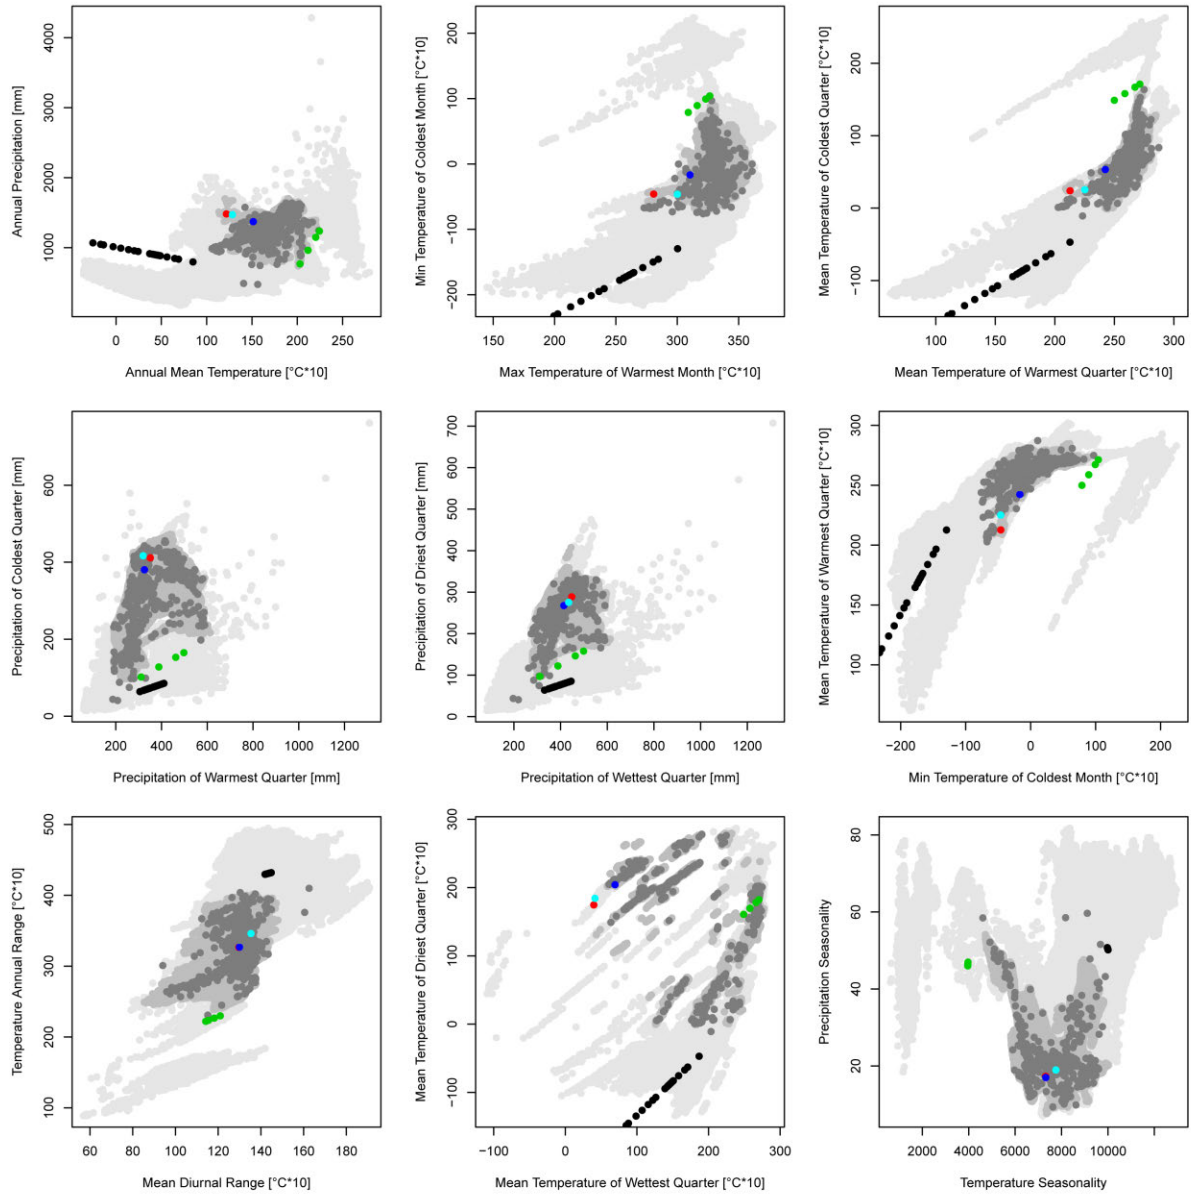

number of samples: 551

number of fossils: 5

sp40 – *Pseudemys floridana*

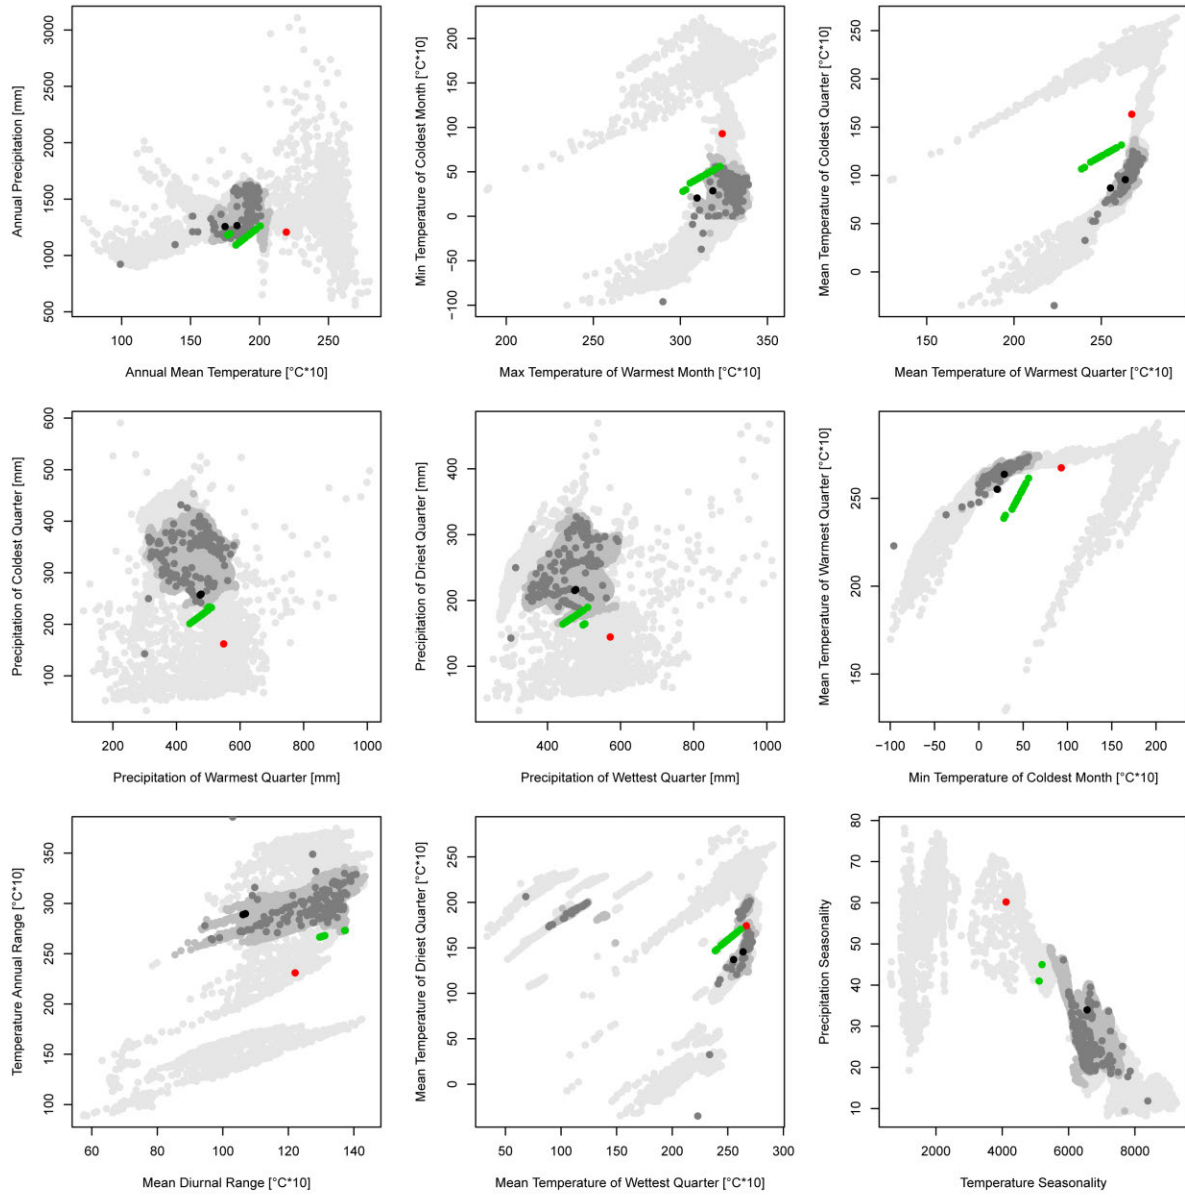

number of samples: 162

number of fossils: 3

sp41 – *Pseudemys gorzugi*

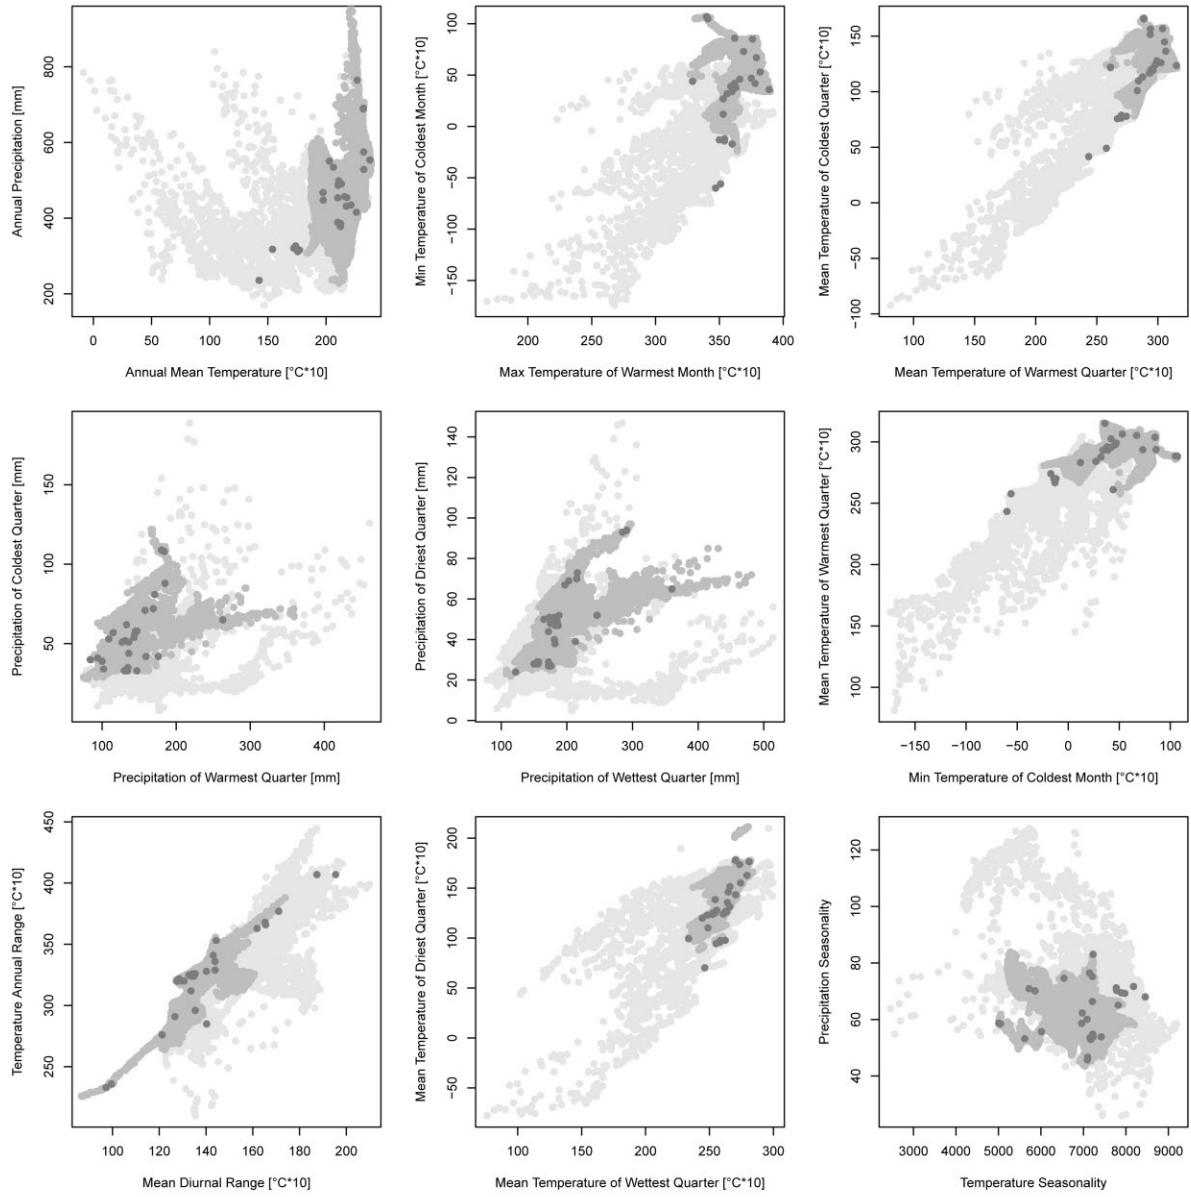

number of samples: 31

number of fossils: 0

sp42 - *Pseudemys nelsoni*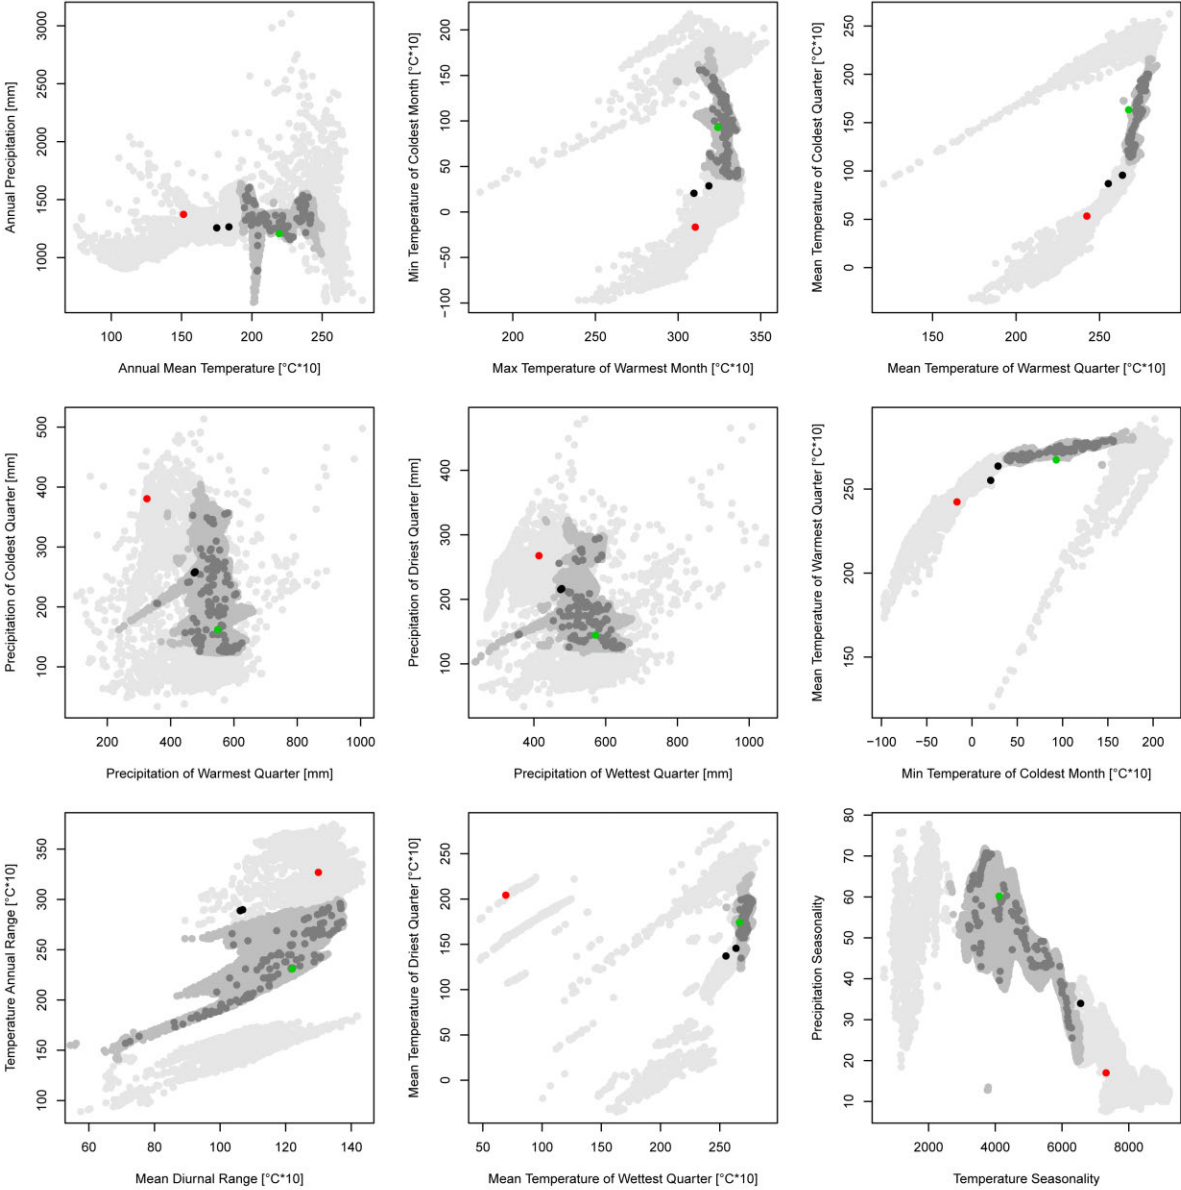

number of samples: 149

number of fossils: 3



sp43 – *Pseudemys peninsularis*

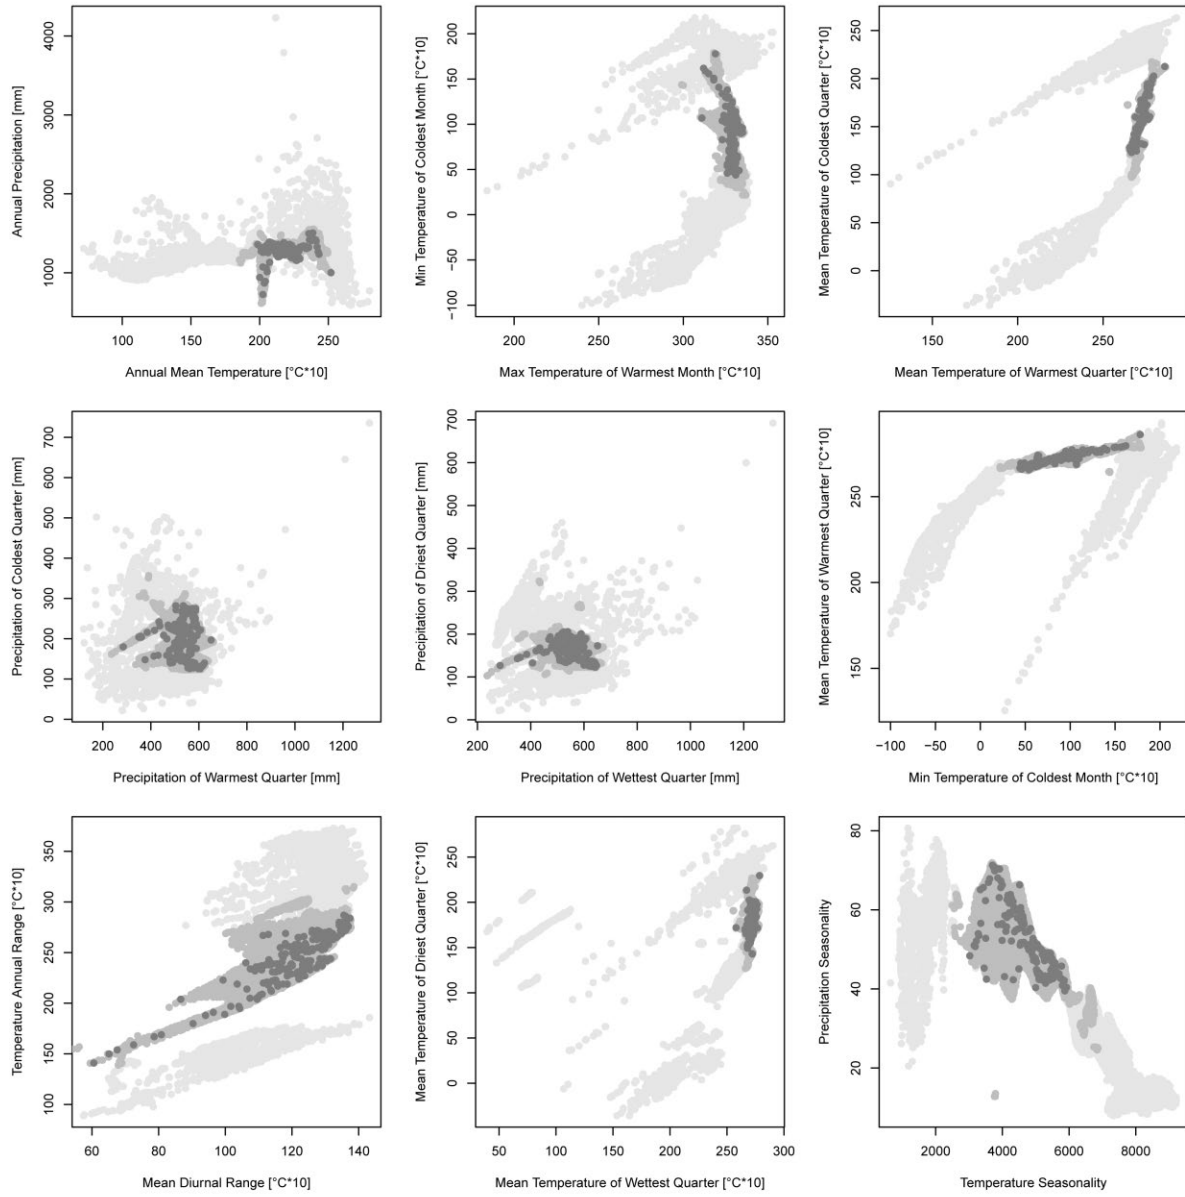

number of samples: 217

number of fossils: 0

sp44 – *Pseudemys rubriventris*

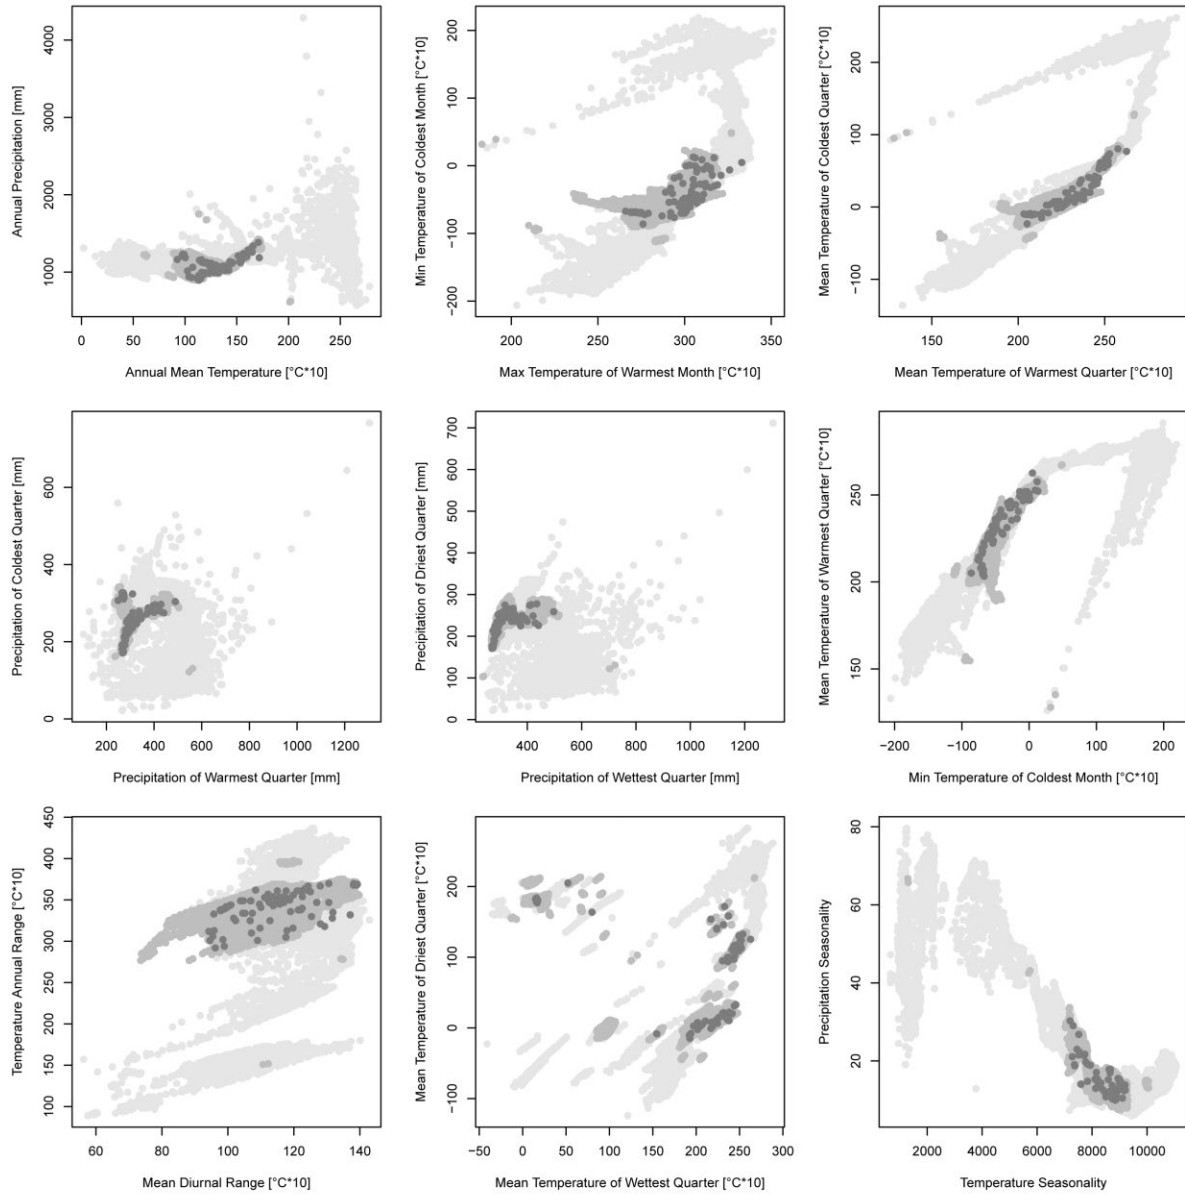

number of samples: 92

number of fossils: 0

sp45 – *Pseudemys texana*

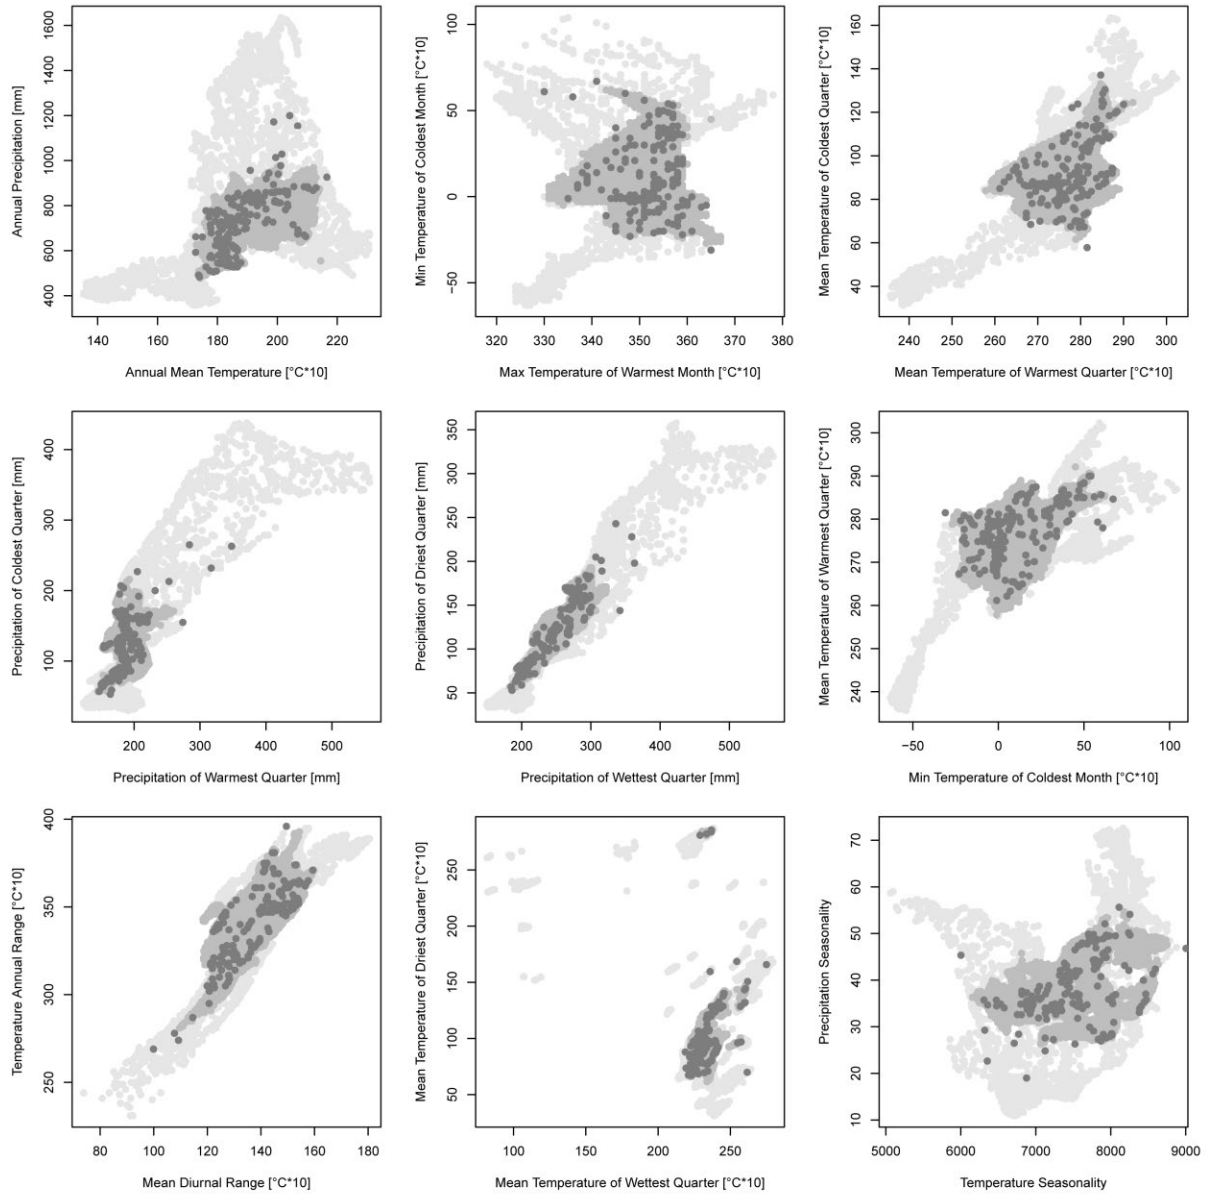

number of samples: 212

number of fossils: 0

sp46 – *Rhinoclemmys pulcherrima*

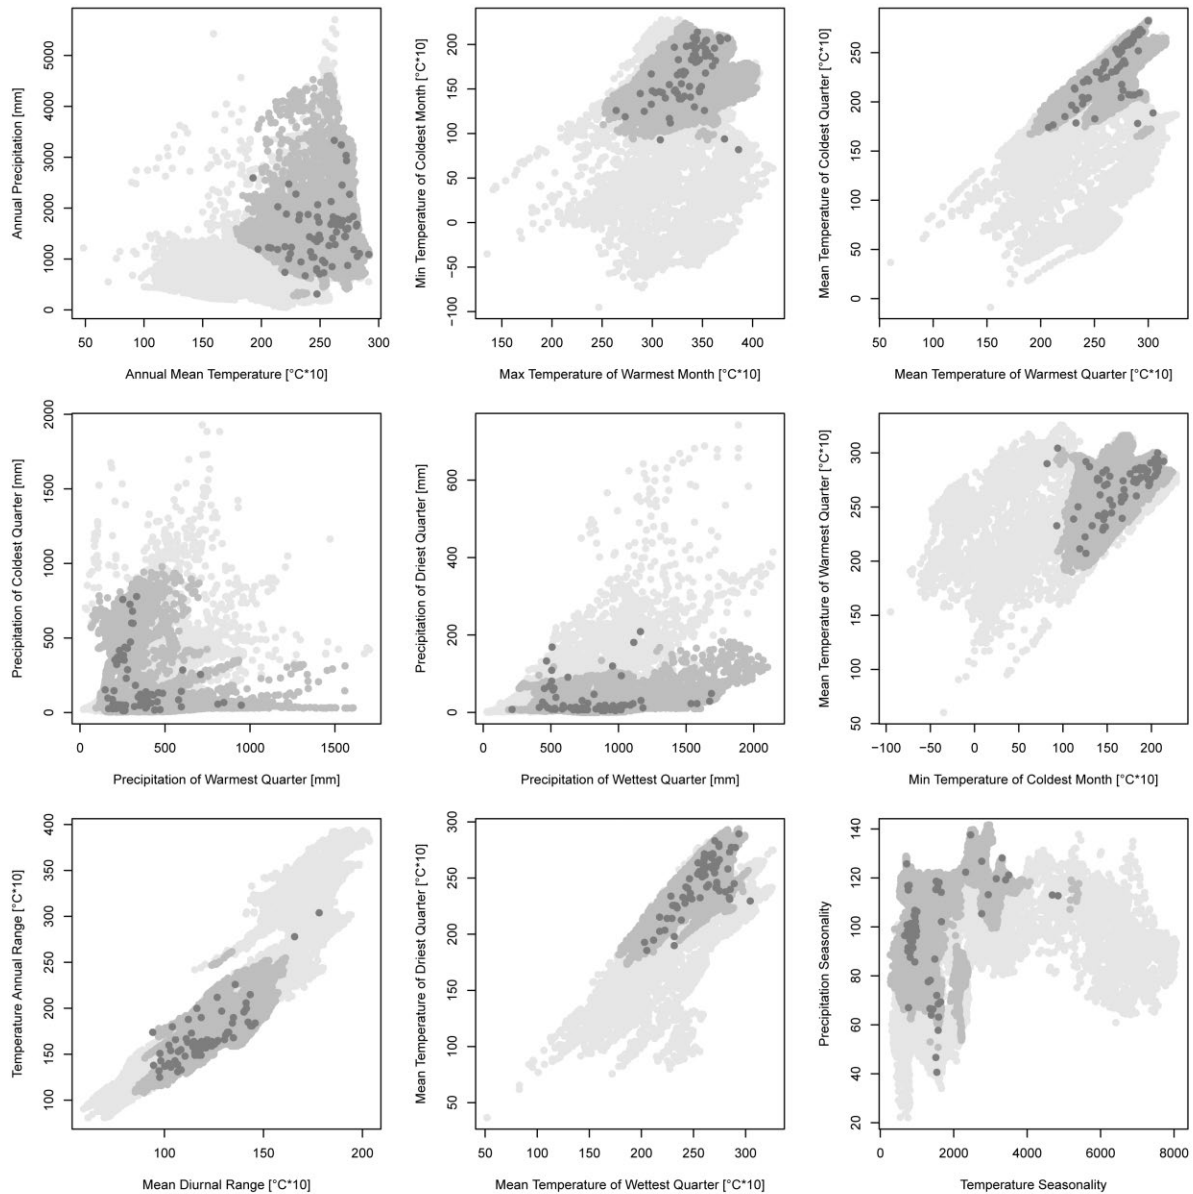

number of samples: 76  
number of fossils: 0

sp47 – *Sternotherus carinatus*

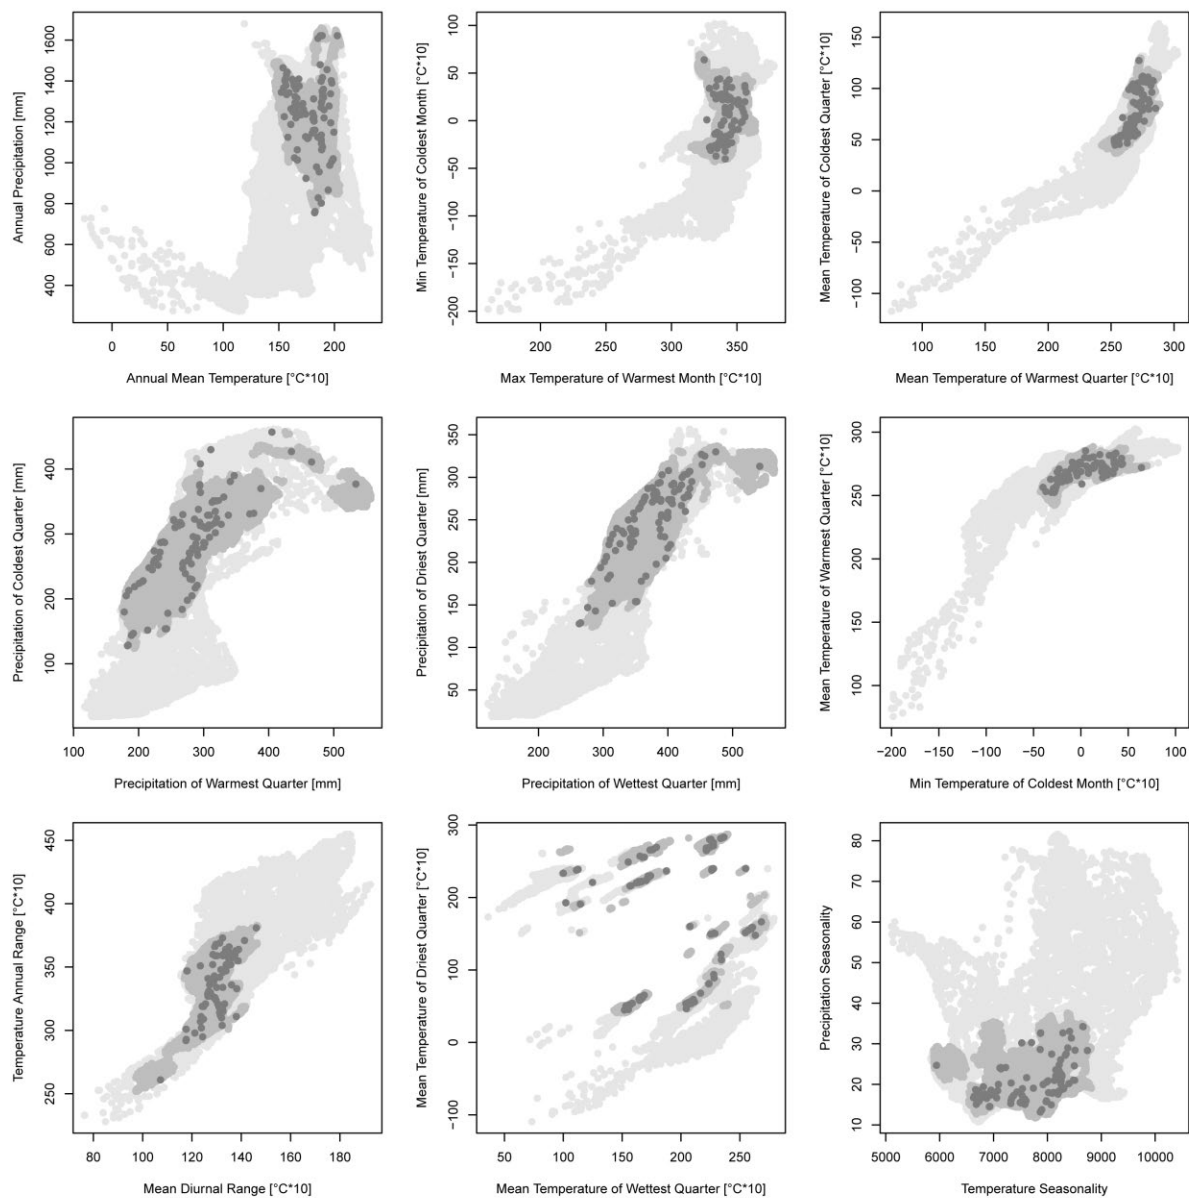

number of samples: 105

number of fossils: 0

sp48 – *Sternotherus depressus*

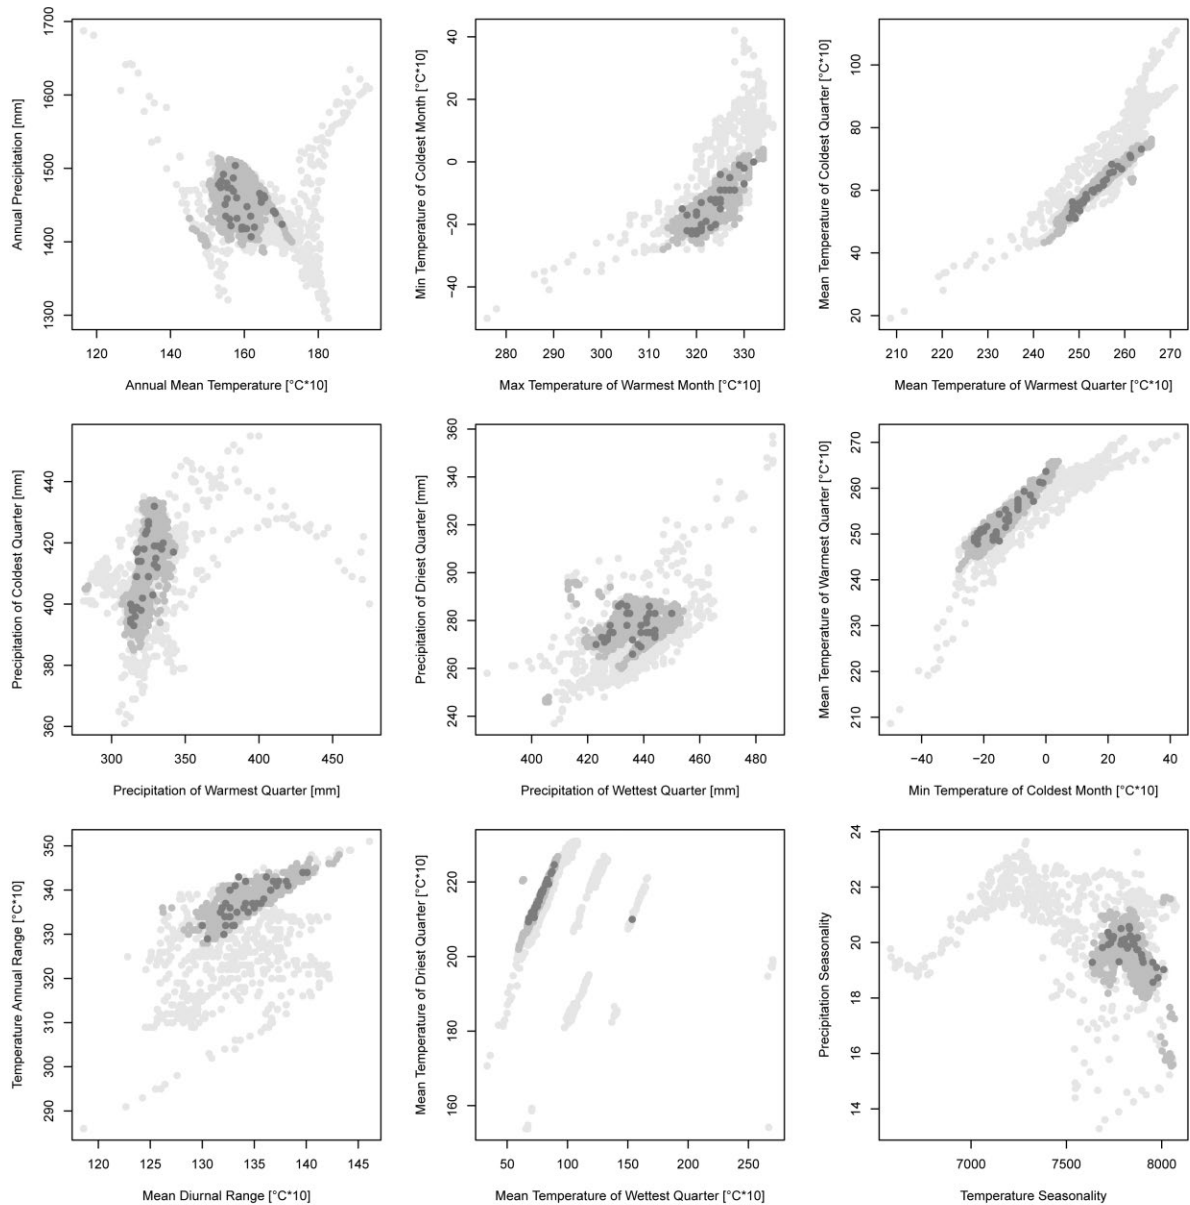

number of samples: 44  
number of fossils: 0

sp49 – *Sternotherus minor*

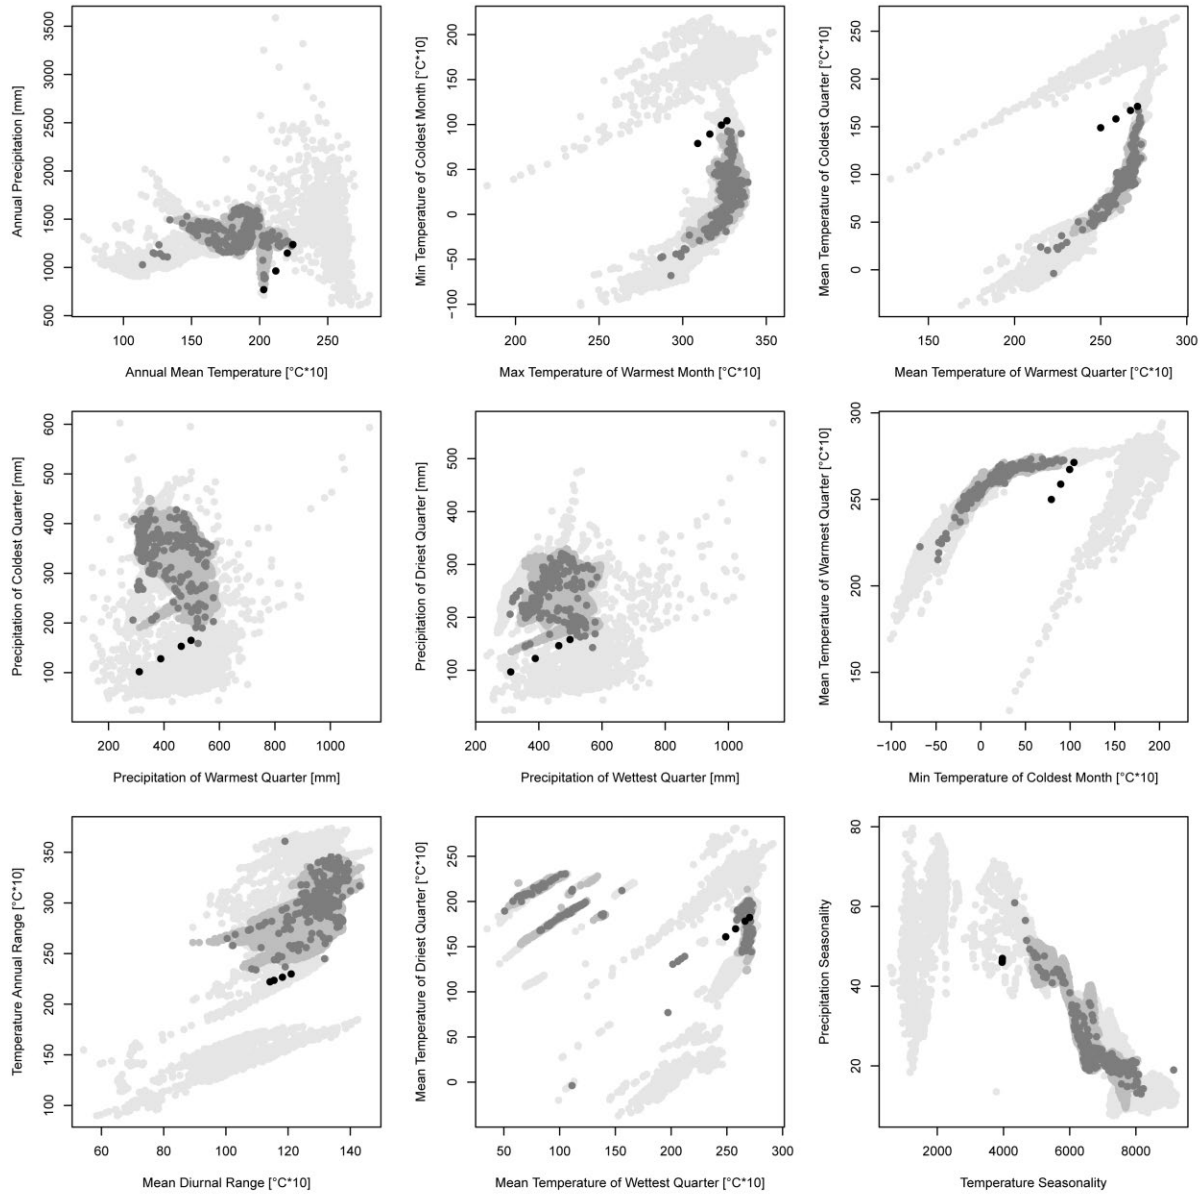

number of samples: 257

number of fossils: 1

sp50 – *Sternotherus odoratus*

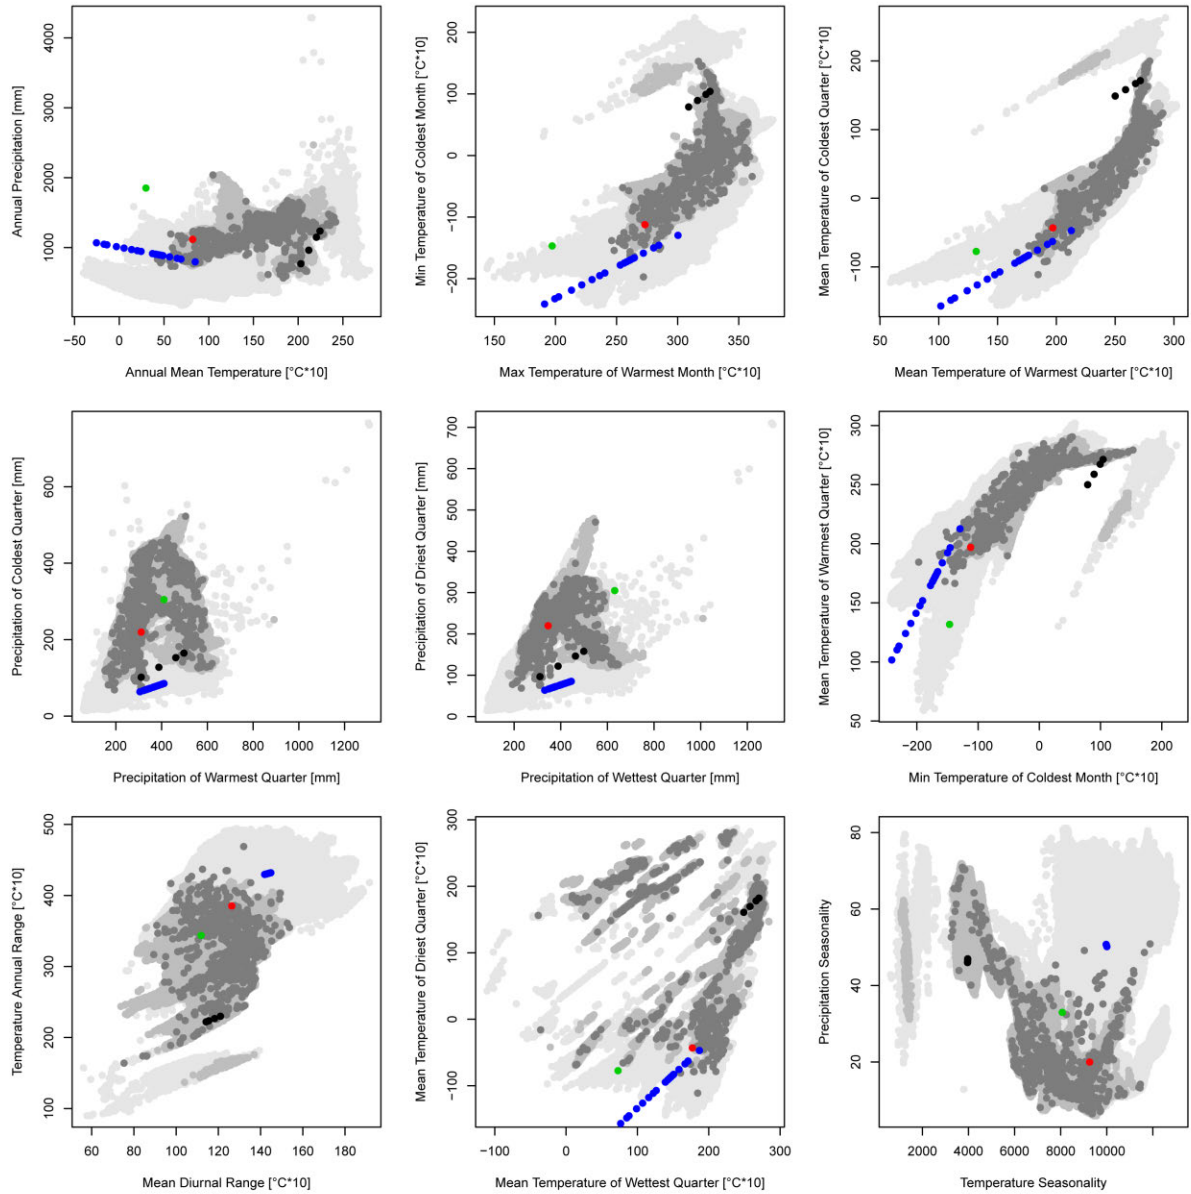

number of samples: 982

number of fossils: 4



sp51 – *Terrapene carolina*

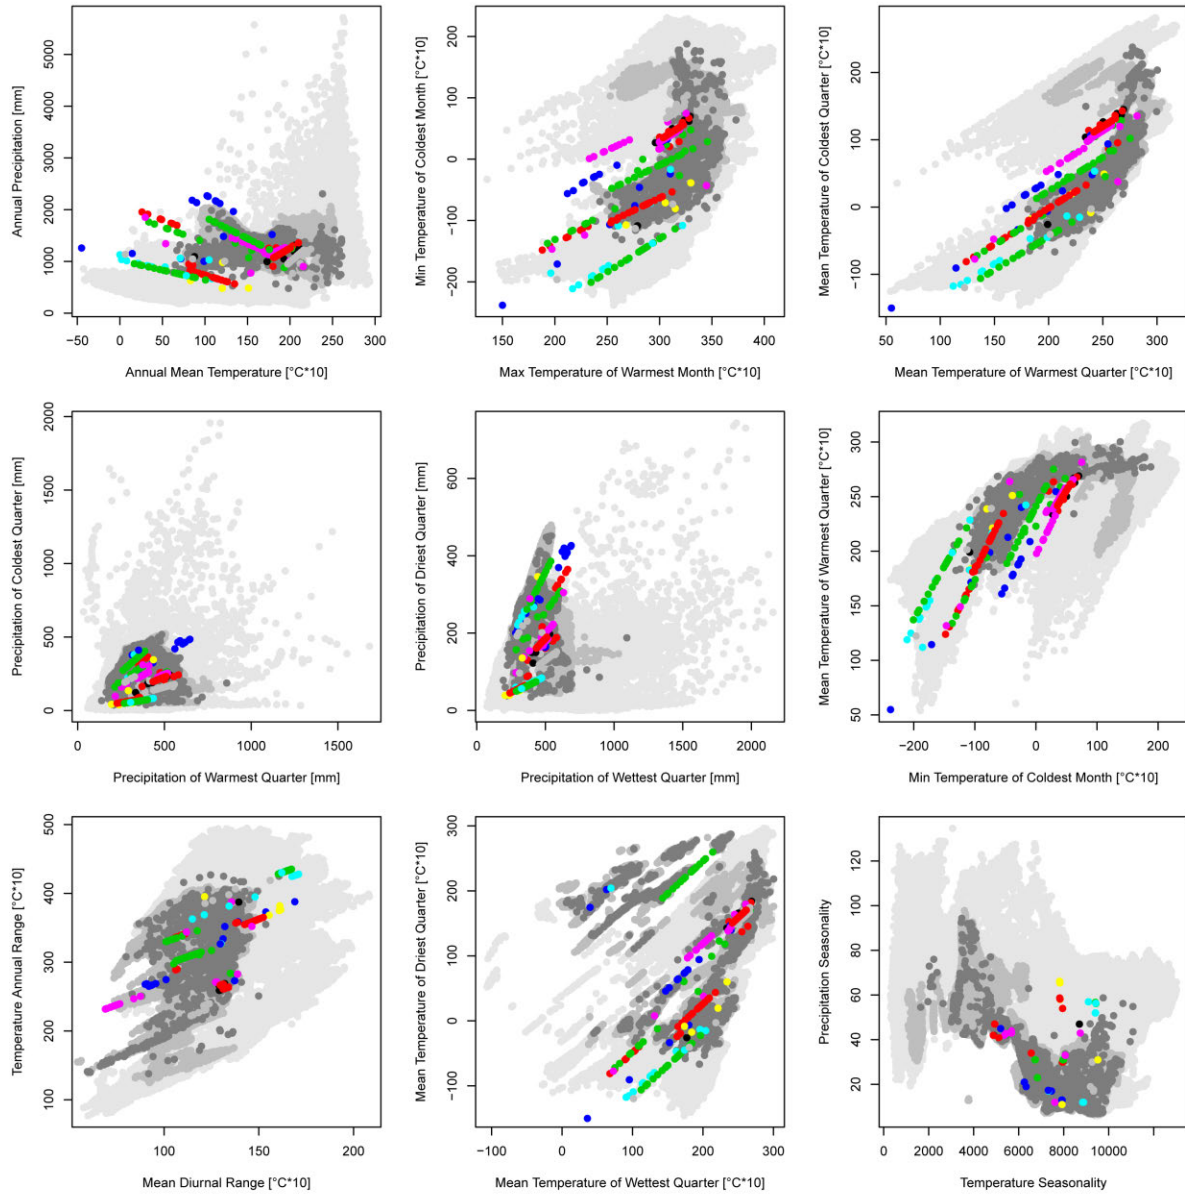

number of samples: 2405

number of fossils: 40

sp52 – Terrapene coahuila

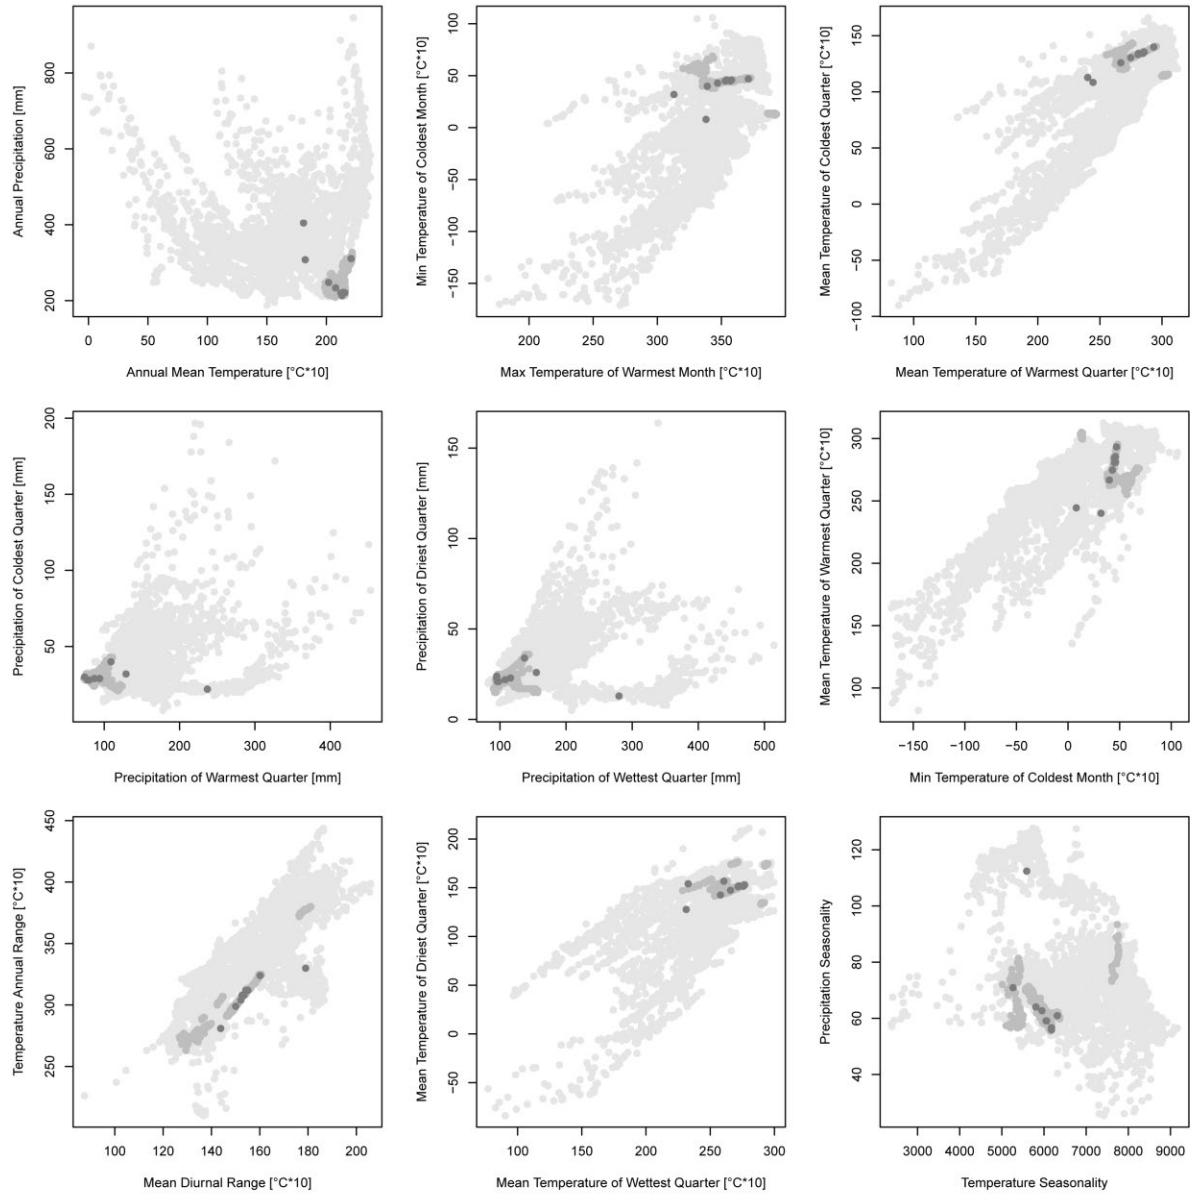

number of samples: 10

number of fossils: 0

sp53 – *Terrapene nelsoni*

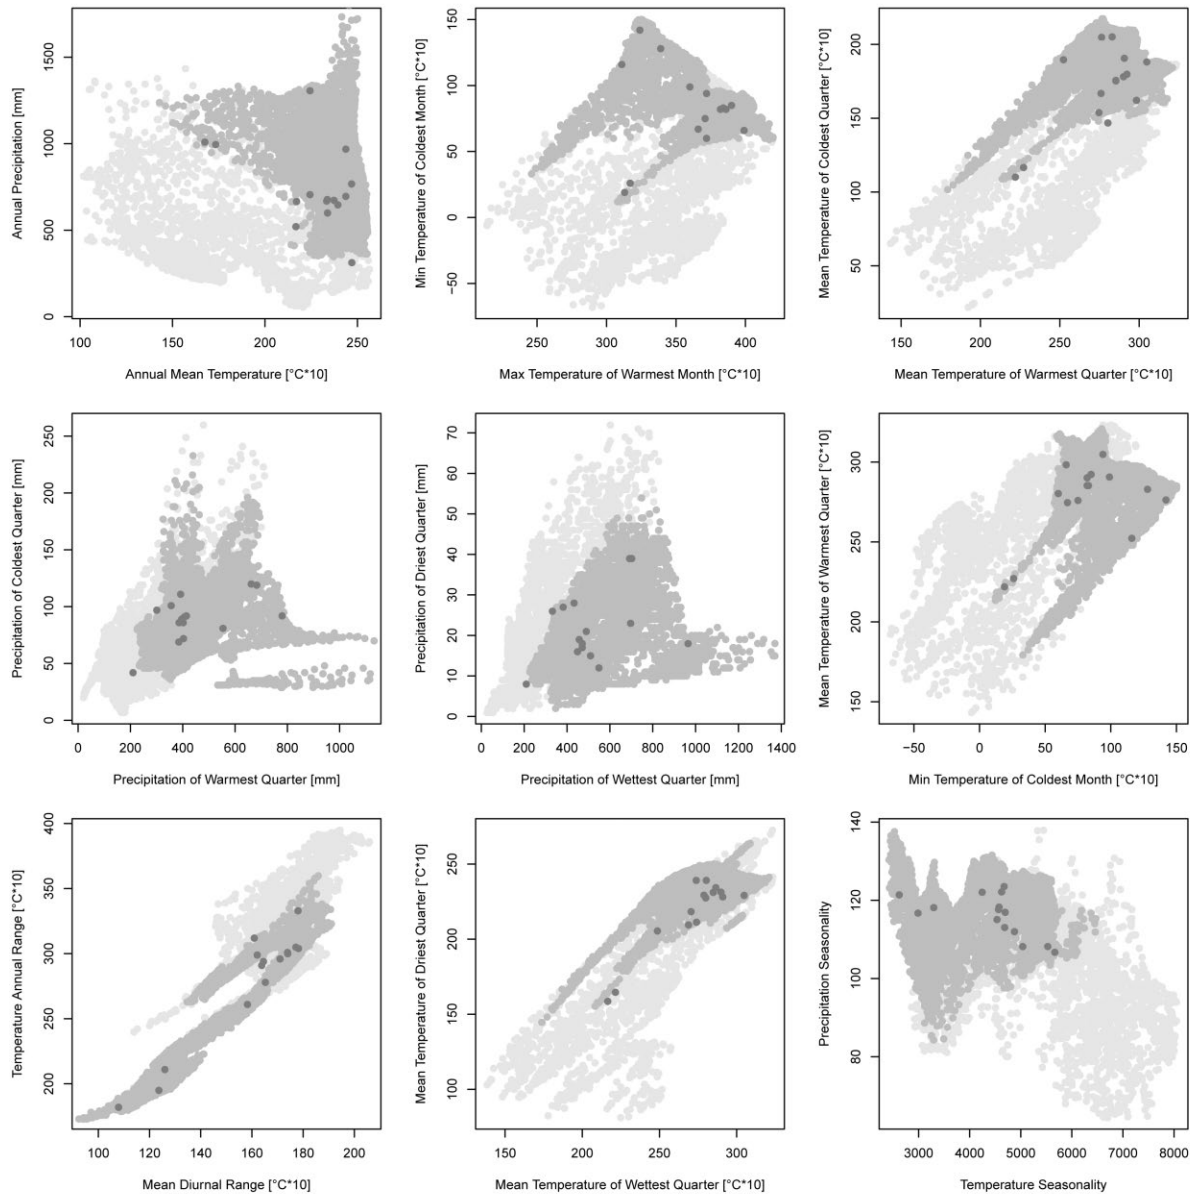

number of samples: 15  
number of fossils: 0

sp54 – *Terrapene ornata*

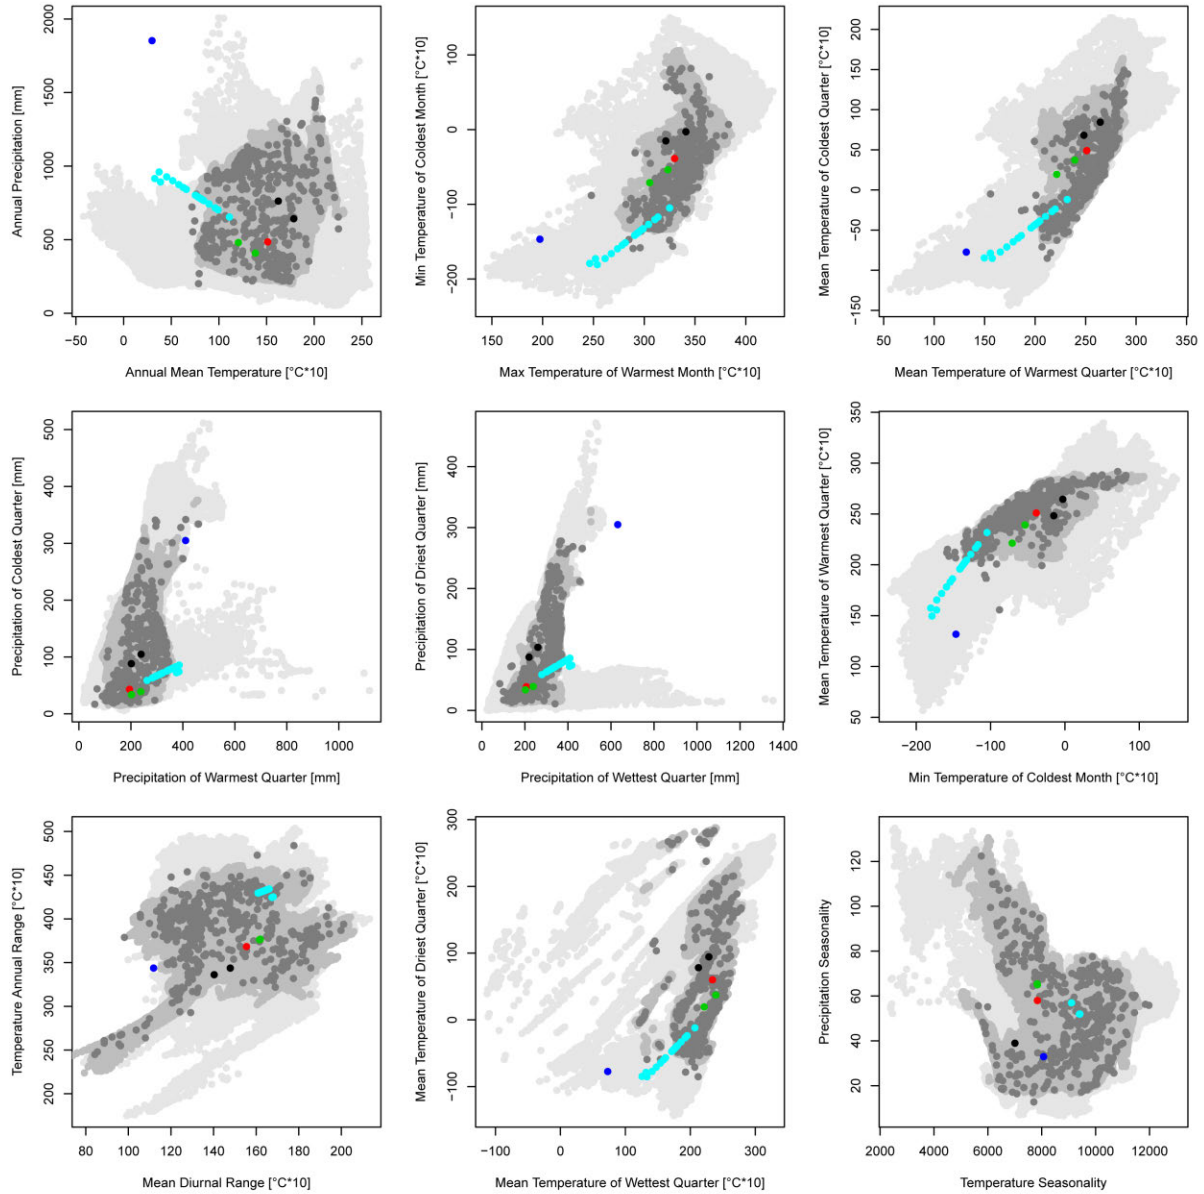

number of samples: 540

number of fossils: 5

sp55 – *Trachemys gaigeae*

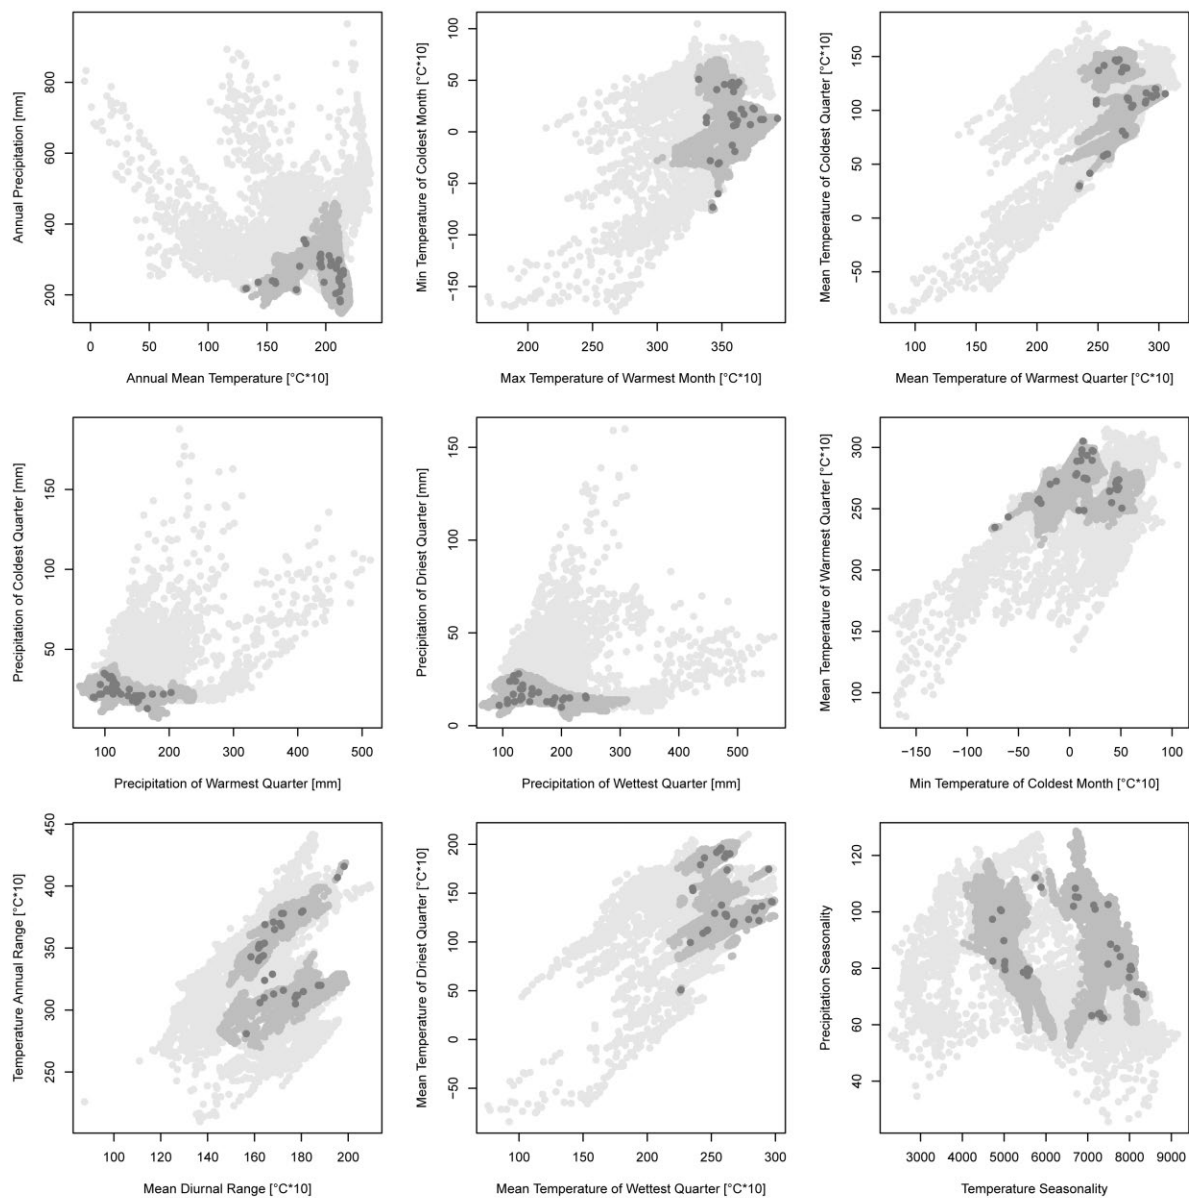

number of samples: 39

number of fossils: 0

sp56 – *Trachemys nebulosa*

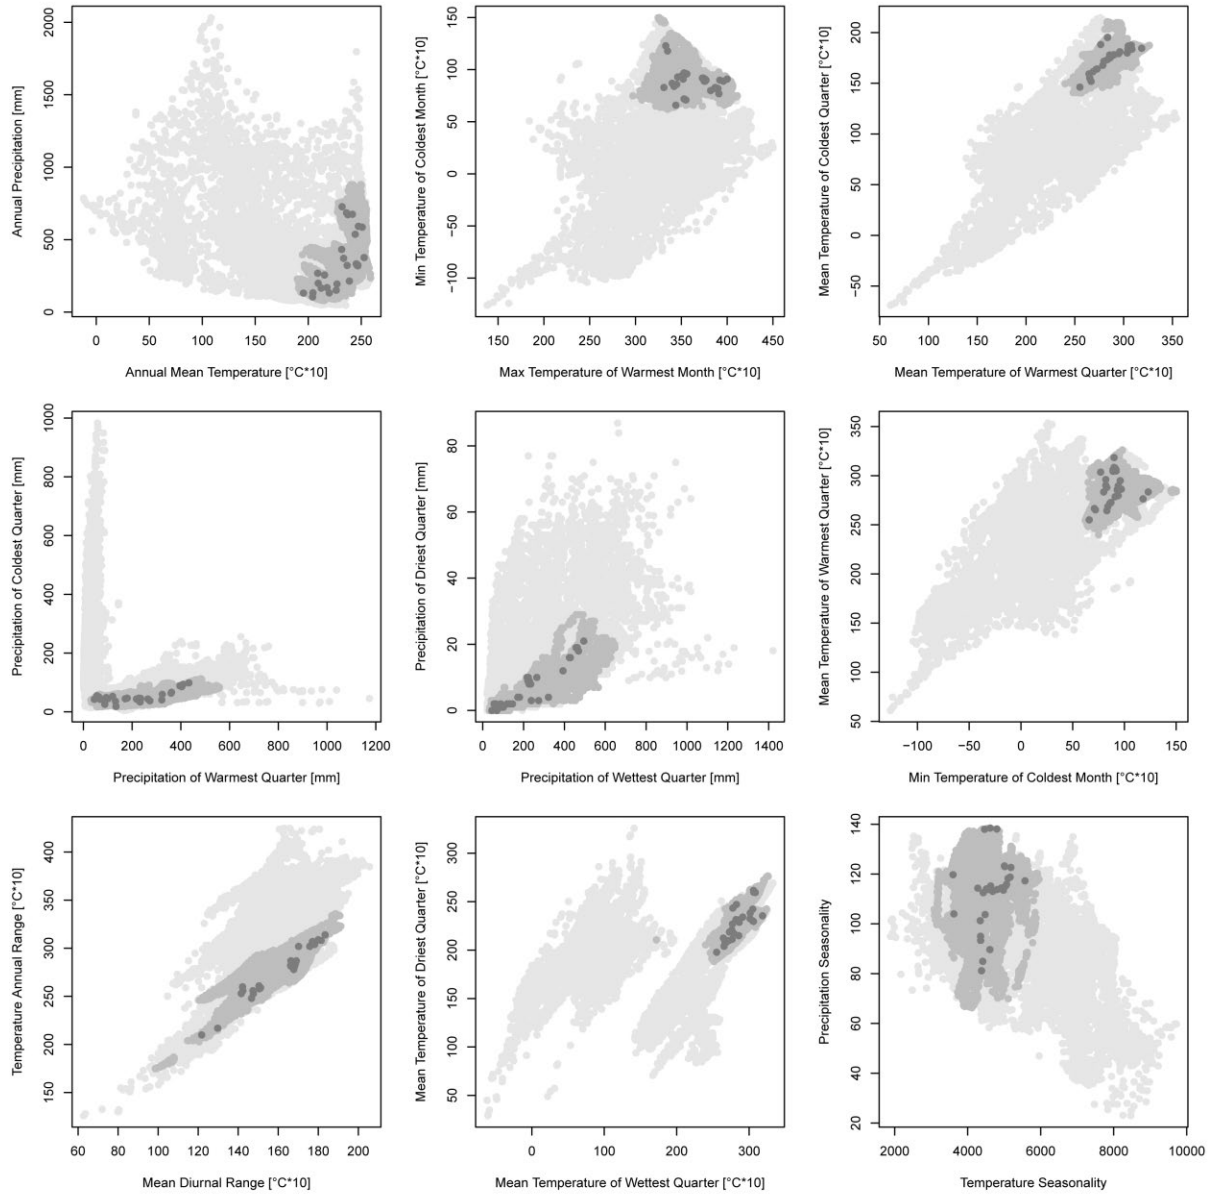

number of samples: 31

number of fossils: 0

sp57 – Trachemys ornata

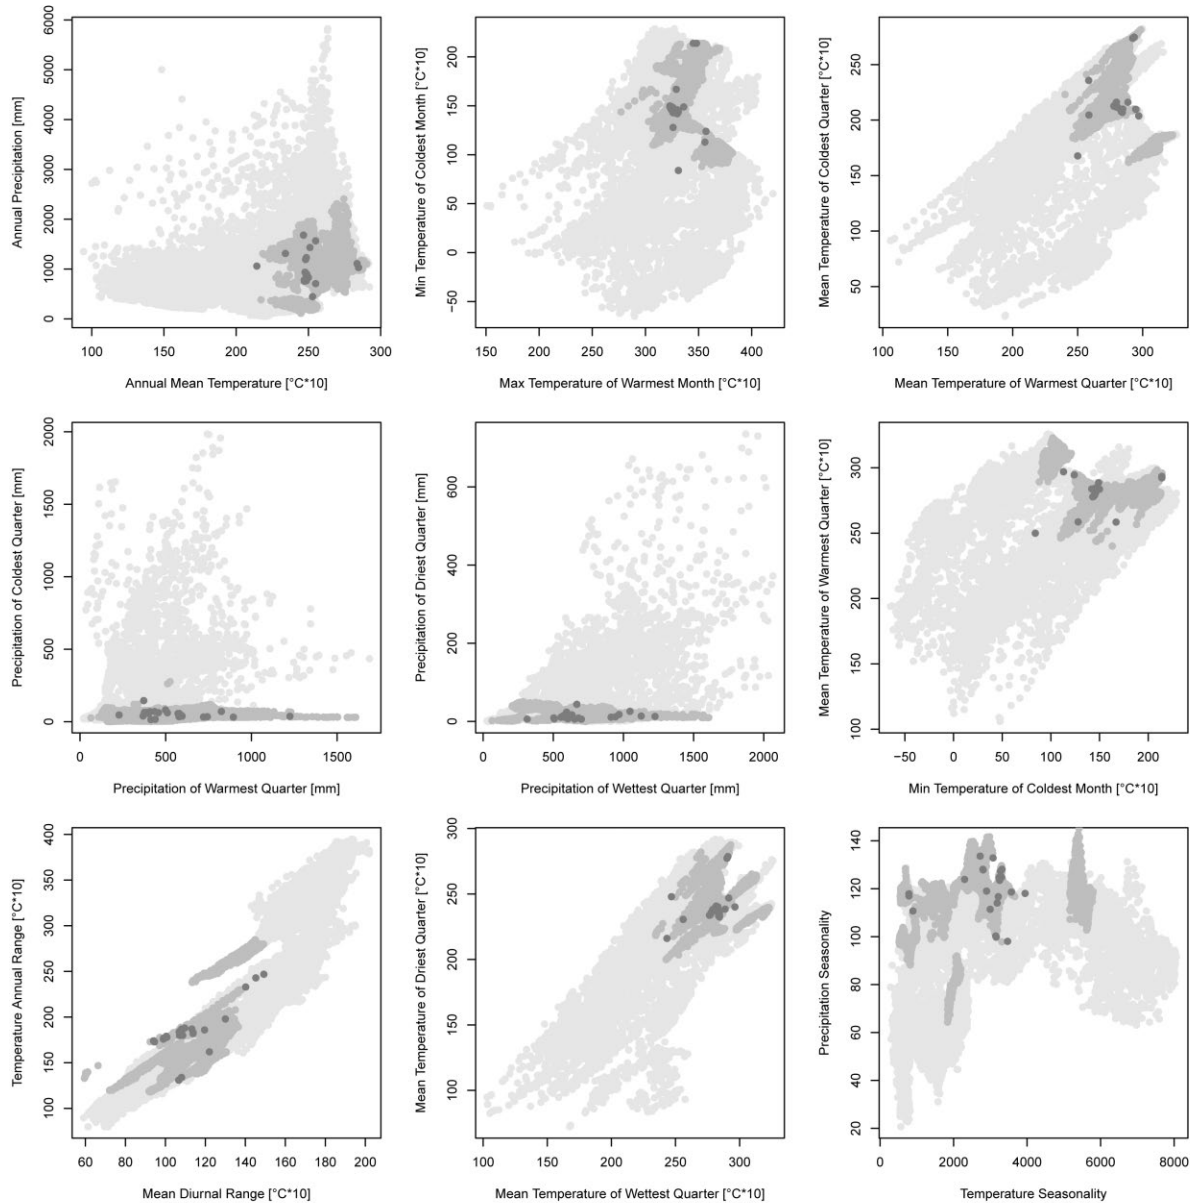

number of samples: 24  
number of fossils: 0

sp58 – *Trachemys scripta*

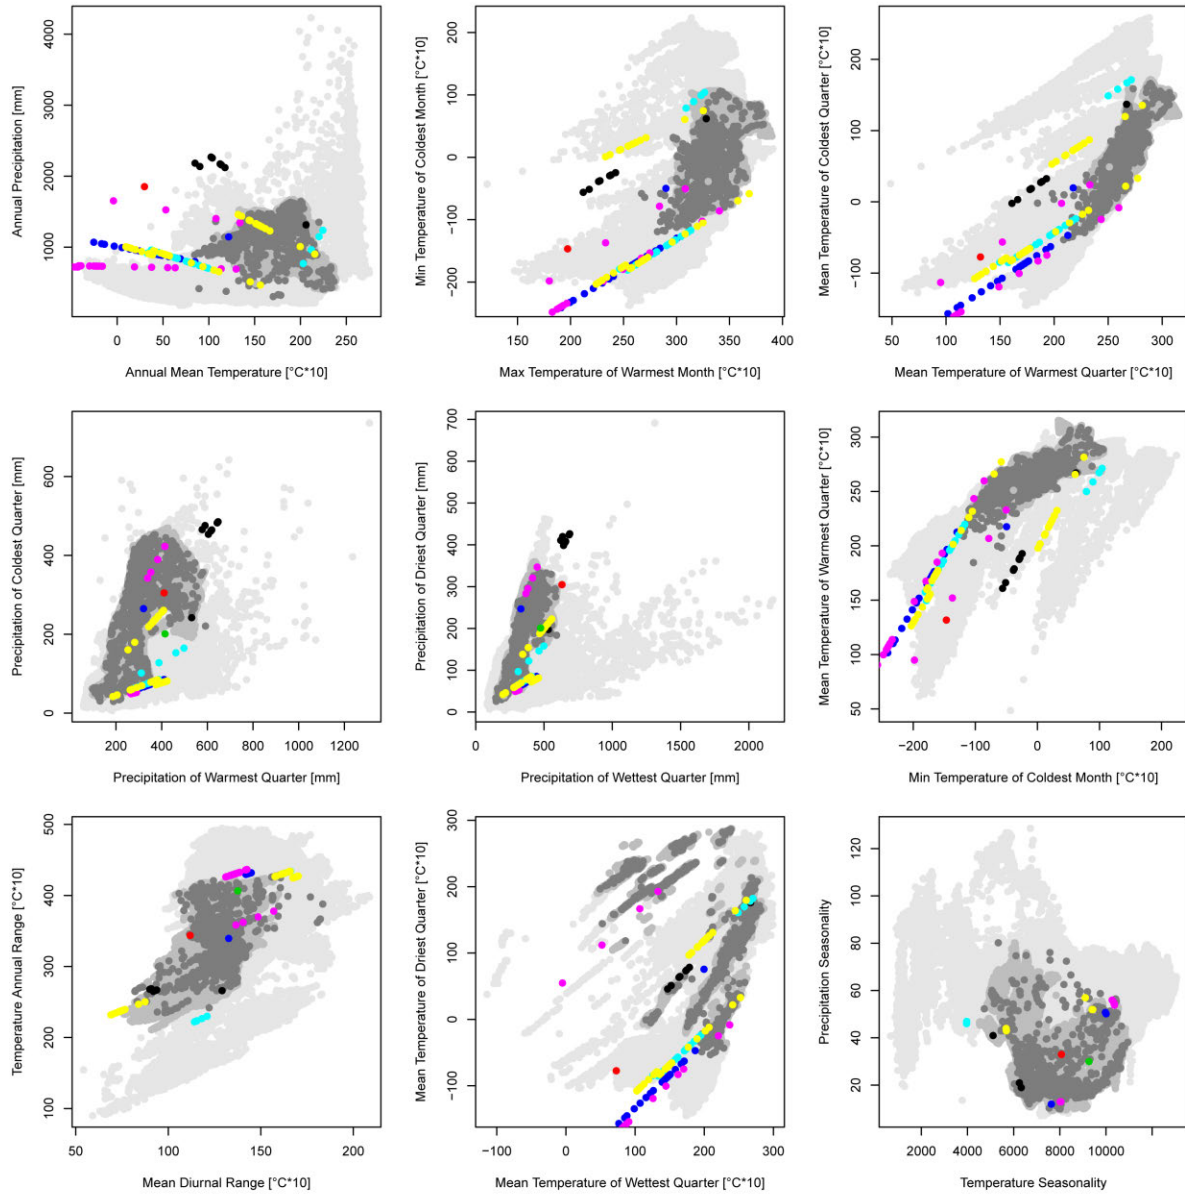

number of samples: 1218

number of fossils: 15



sp59 – *Trachemys taylori*

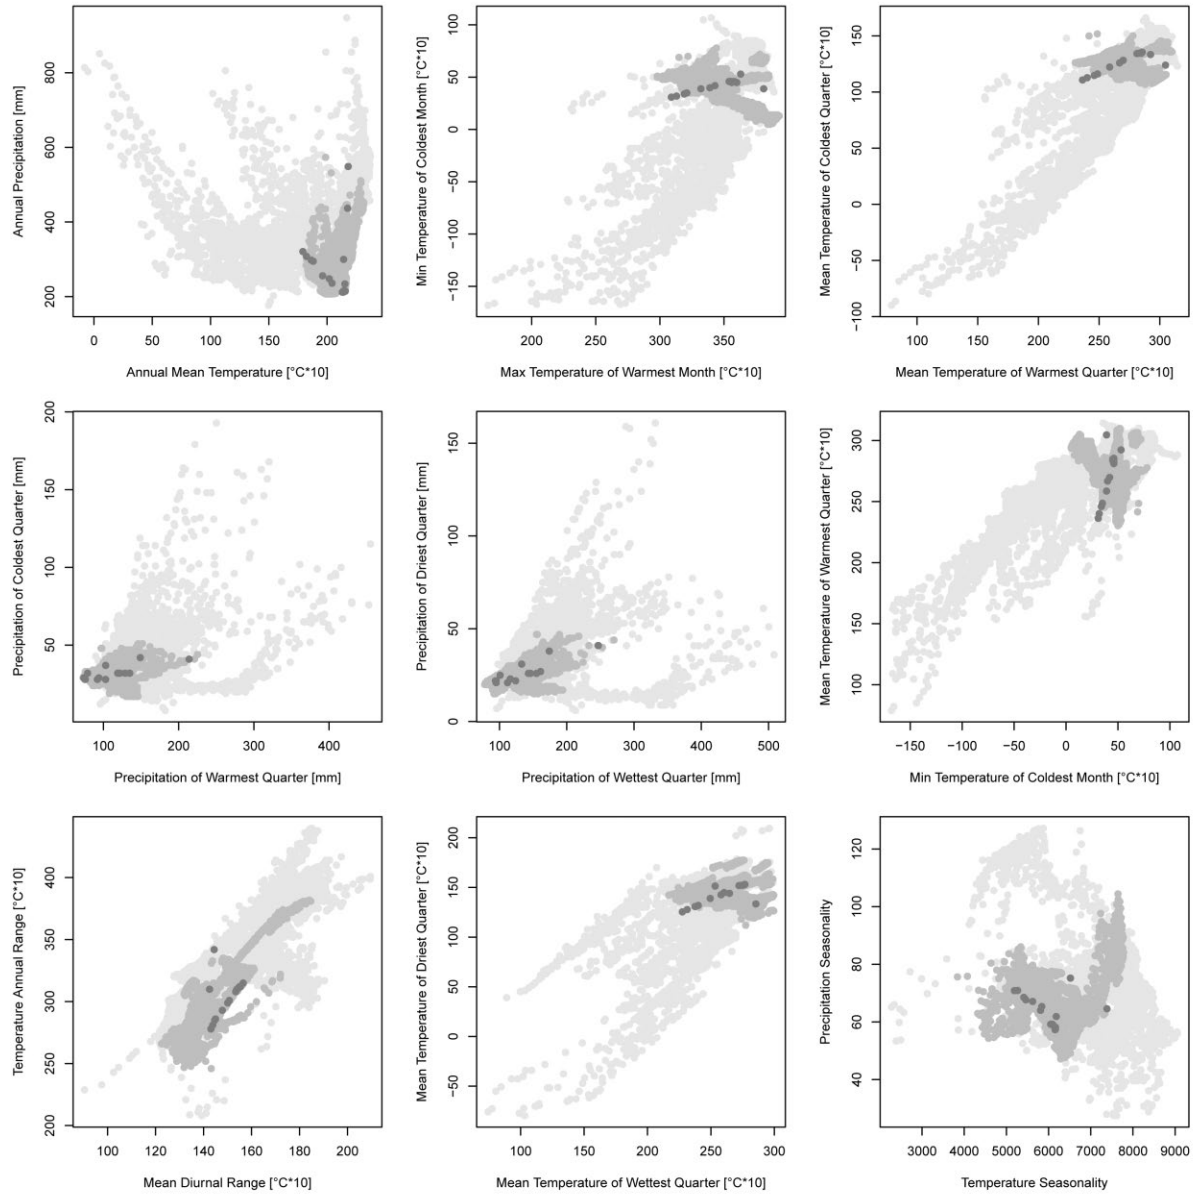

number of samples: 20

number of fossils: 0

sp60 – *Trachemys venusta*

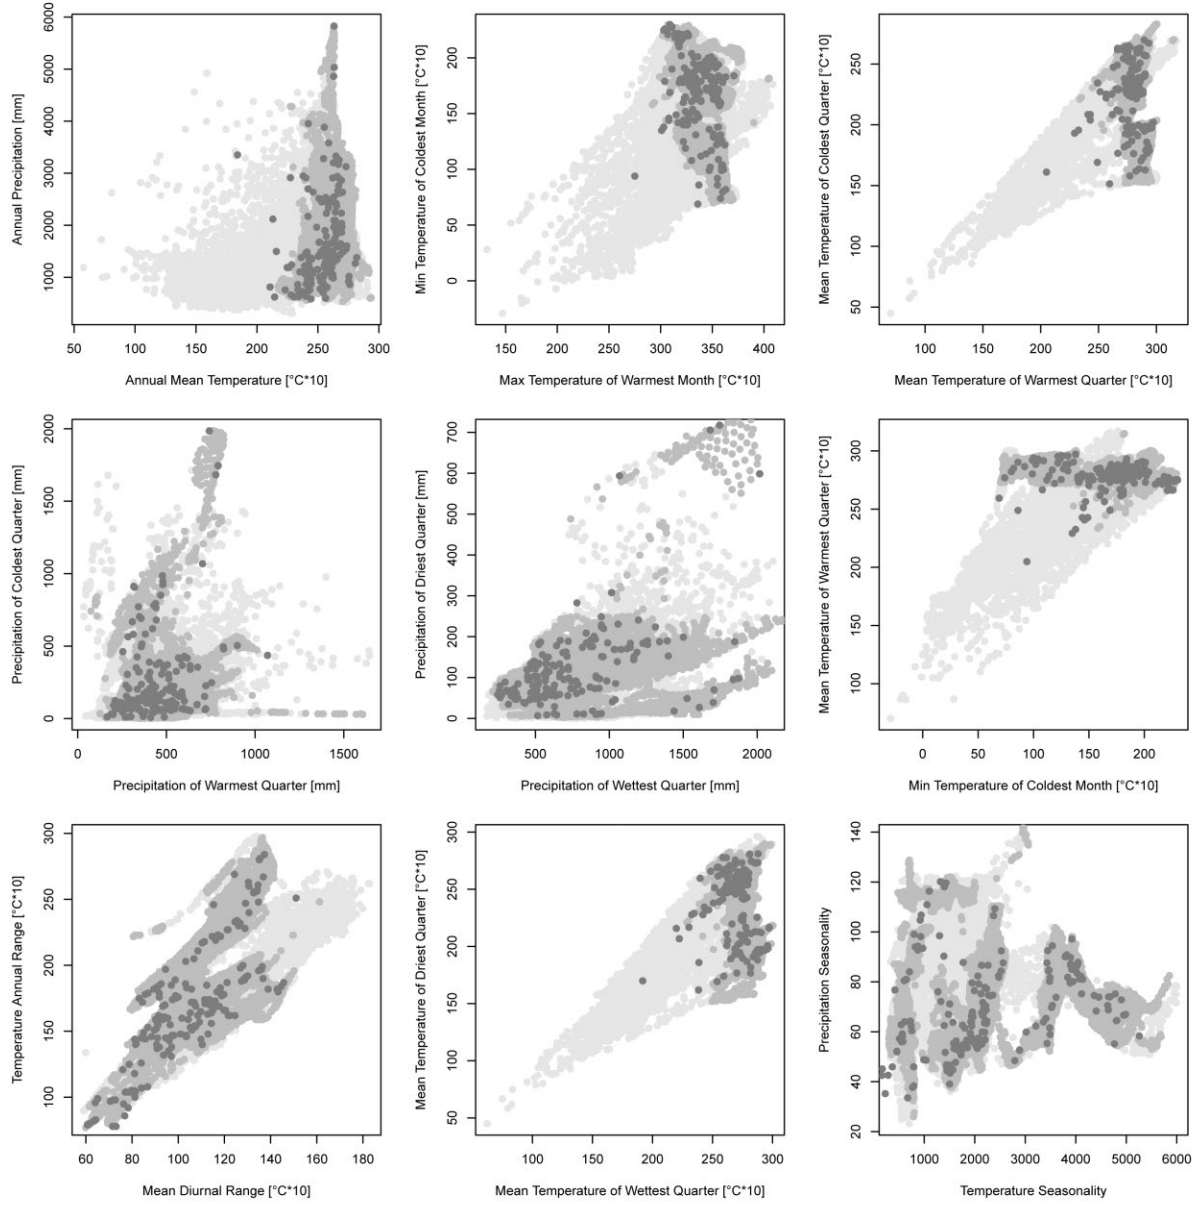

number of samples: 187

number of fossils: 0

sp61 – Trachemys yaquia

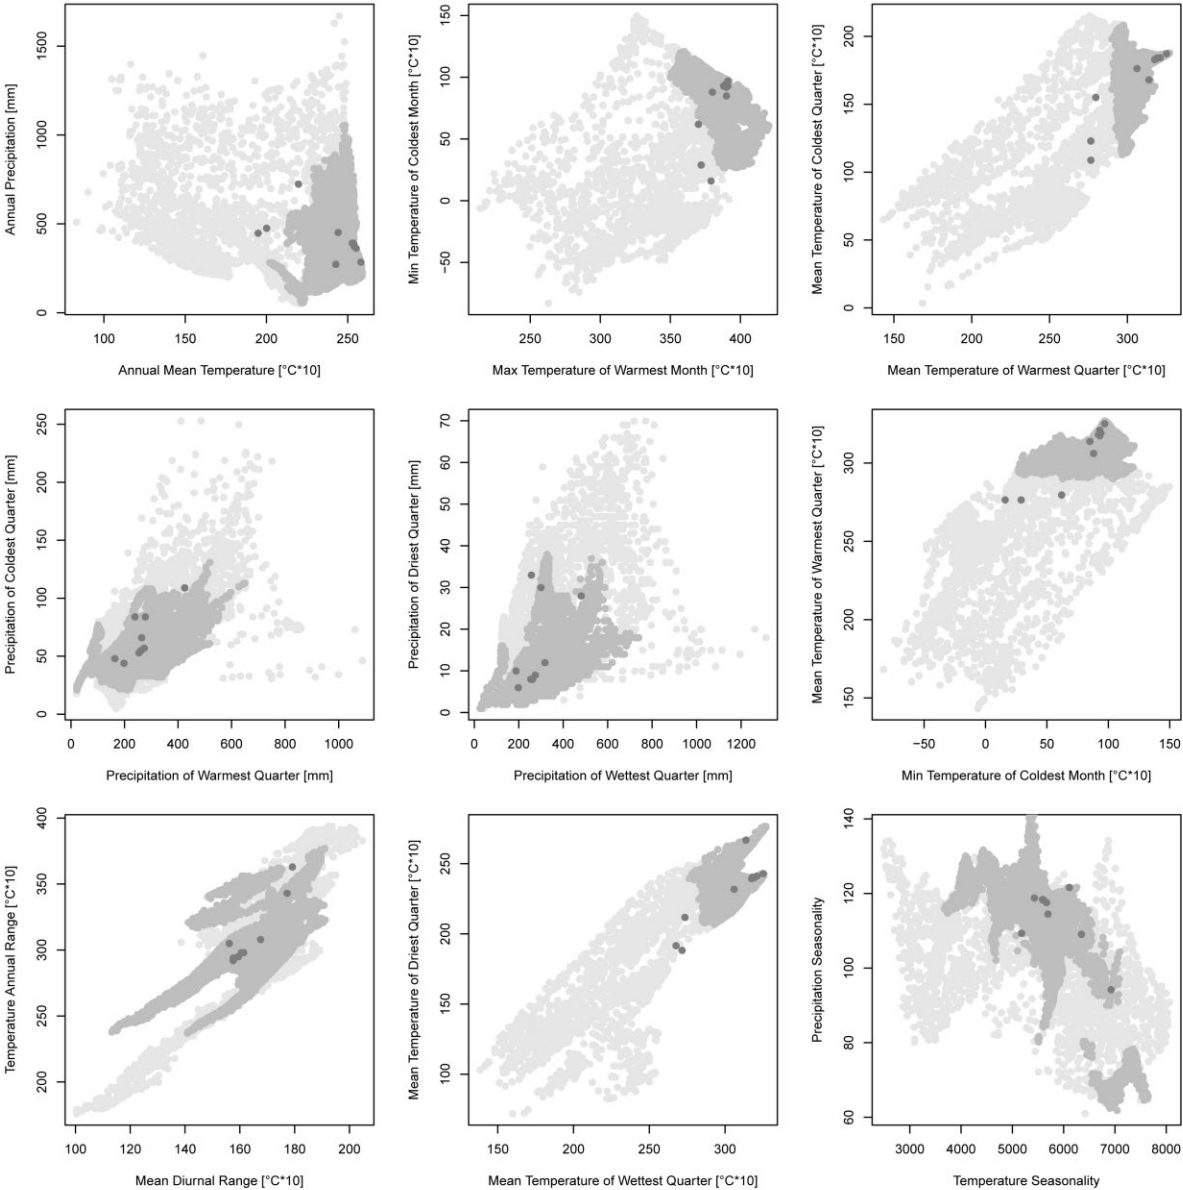

number of samples: 10

number of fossils: 0
