# Supplementary material for: Evaluating the Significance of Paleophylogeographic Species Distribution Models in Reconstructing Quaternary Range-Shifts of Nearctic Chelonians
Source: PLOS journal article supplement (doi:10.1371/journal.pone.0072855), 2013-10-09
Supplement: S1 (10.1371/journal.pone.0072855.s001) [file journal.pone.0072855.s001]

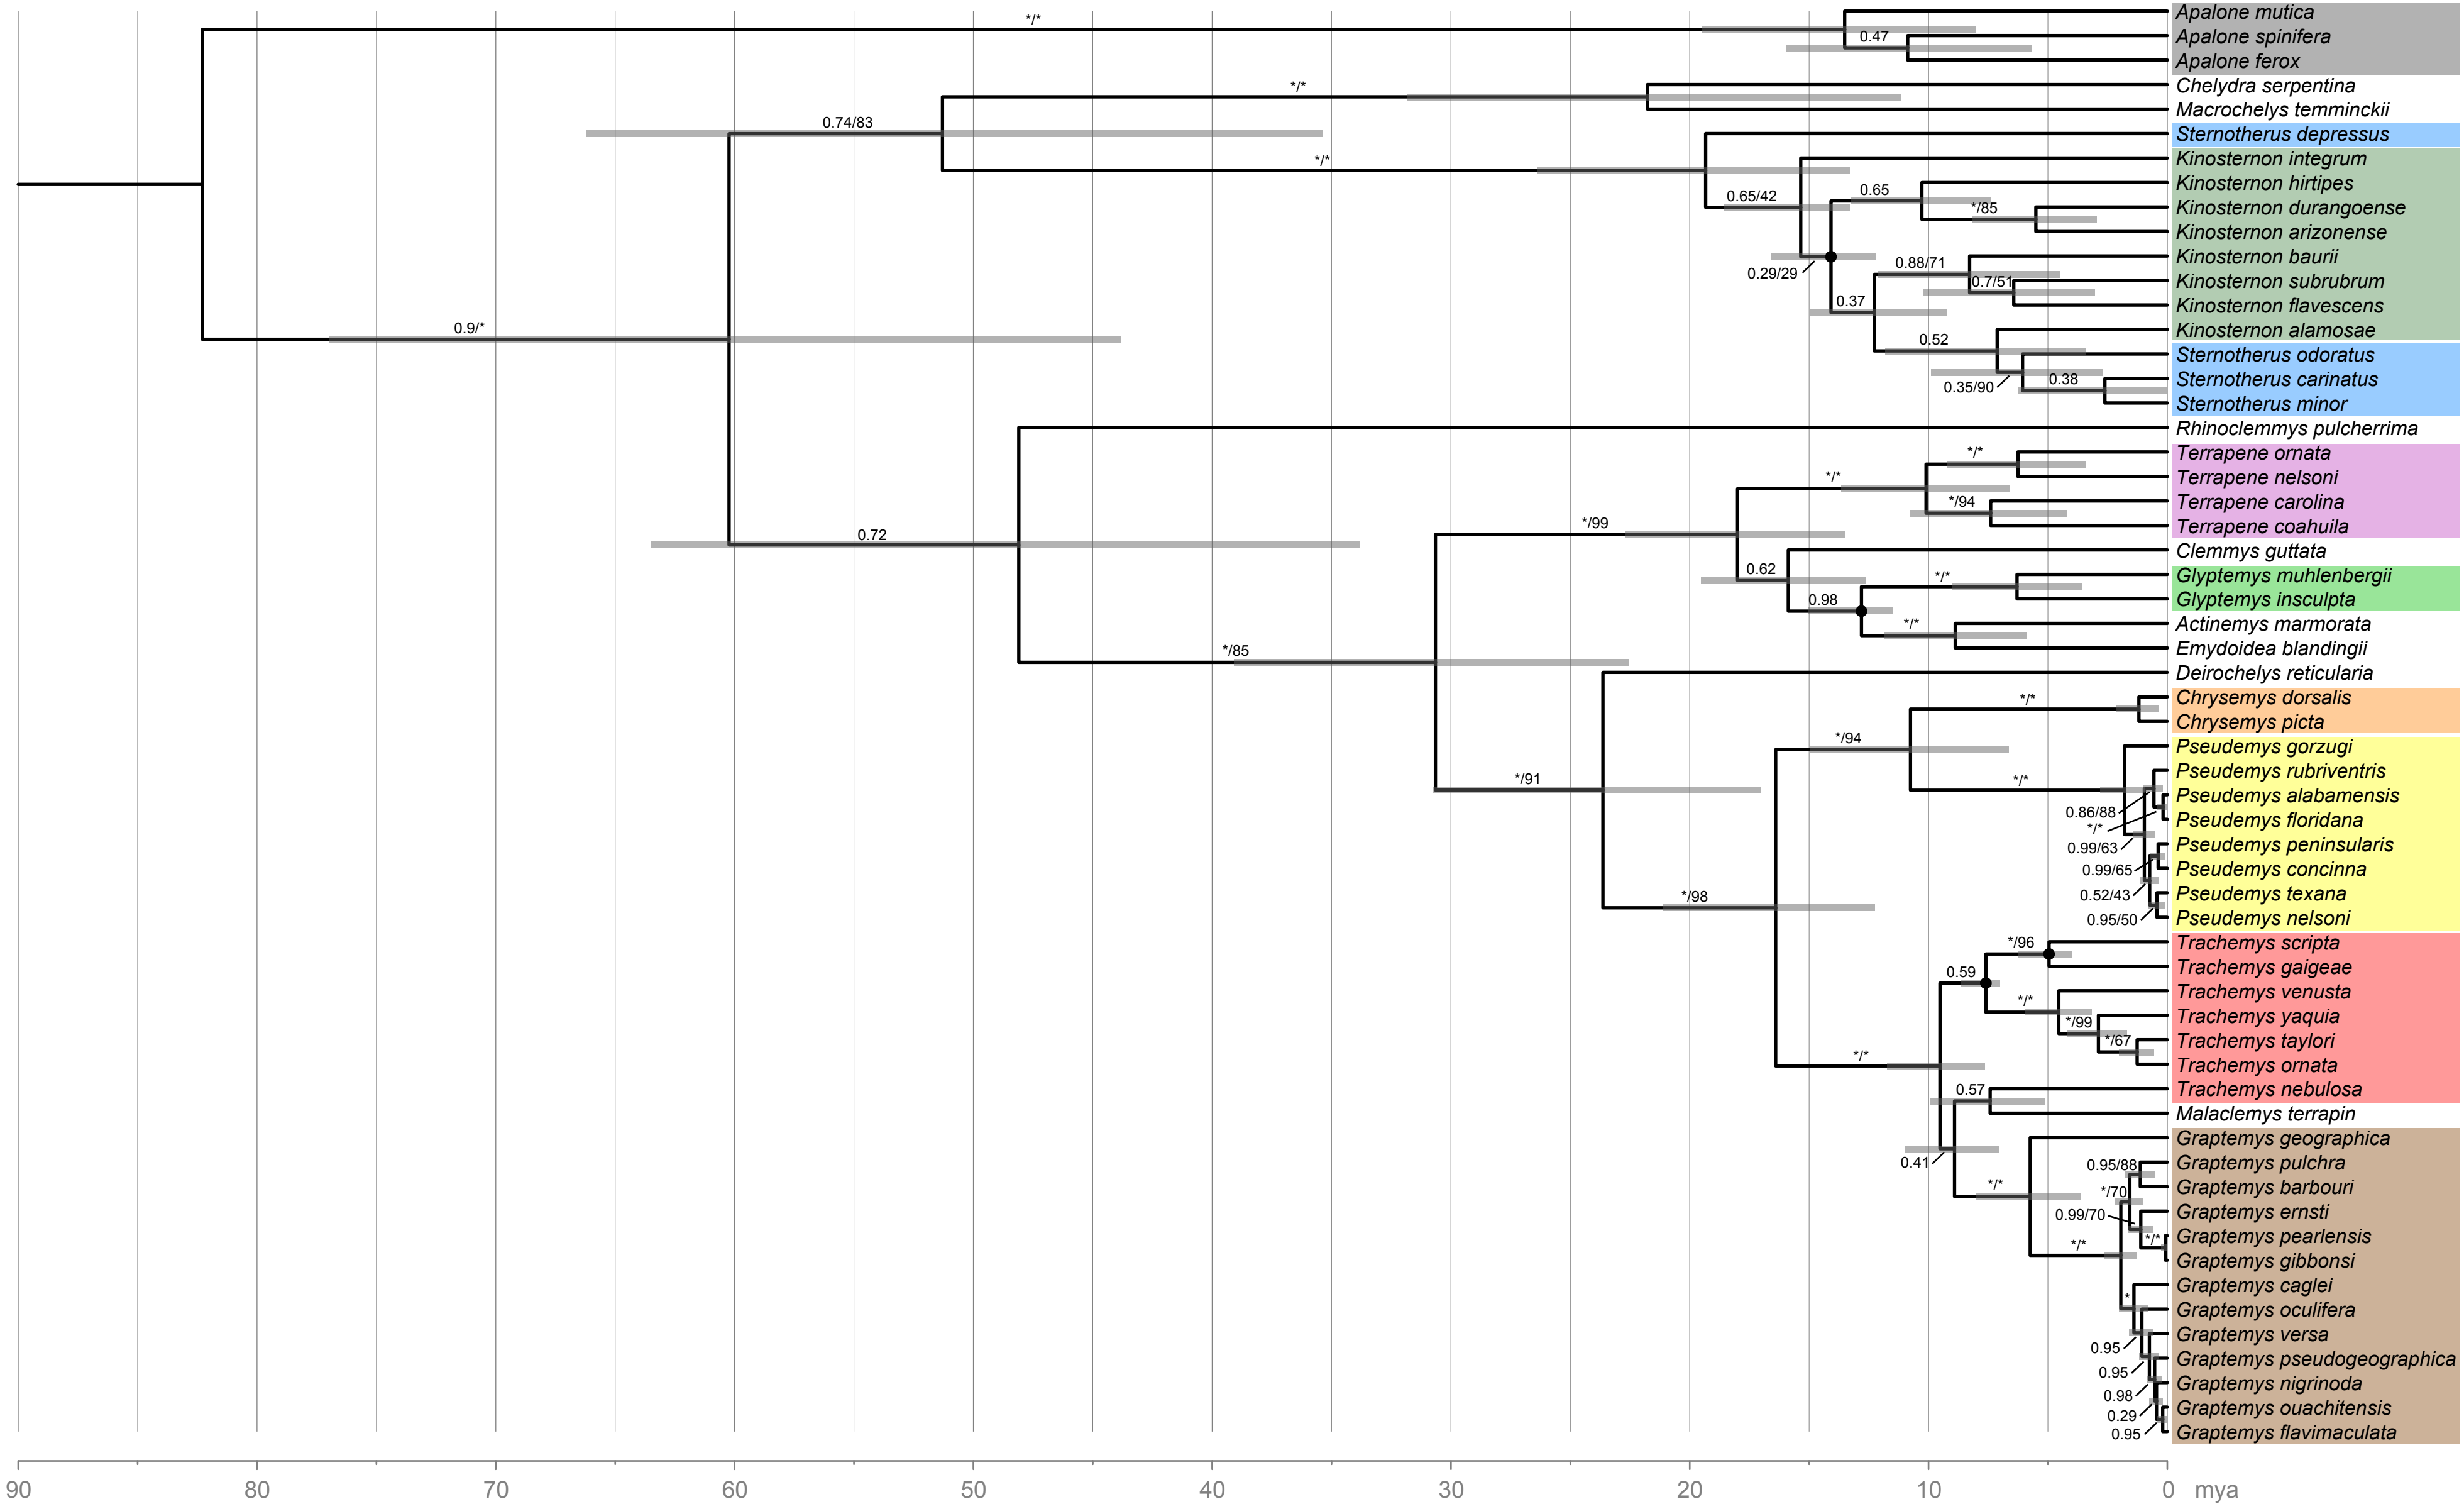

Rödder, D., A. M. Lawing, M. Flecks, F. Ahmadzadeh, J. Dambach, J. O. Engler, J. C. Habel, T. Hartmann, D. Hörnes, F. Ihlow, K. Schidelko, D. Stiels, P. D. Polly. 20XX. Evaluating the significance of palaeophylographic species distribution models in reconstructing Quaternary range-shifts of Nearctic Chelonians. PLoS ONE X: XX – XX

**Supplementary material S6:** Dated phylogeny of 59 species of Nearctic turtles. Posterior probabilities (first value above branches) and Maximum Likelihood bootstraps (second value above branches), asterisks code values of 1 and 100, respectively. Grey bars illustrate 95% highest posterior density intervals of node ages. Nodes marked by a black circle were used for calibration.
